# Supplementary material
Source: Frontiers journal article supplement (https://www.frontiersin.org/articles/42810)
Supplement: Data_Sheet_3.XLSX [file Data_Sheet_3.XLSX]

## Sheet: SuppTable 3 - COMPARA rice loci
Supplemental Table 3. COMPARA (v. 36) results of rice loci with sequence homology to Arabidopsis genes involved in root growth and development
O.s. MSU V.6 Locus ID	MSU V.6 -Start	MSU V.6 -End	A.t. TIGR Locus ID	AGI map-Start	AGI map-End	Homology Relationship	Interpro Union	Interpro Intersection	Shared Interpro ID	Shared Interpro Name
LOC_Os01g36720	20385150	20387472	AT1G08090	2524076	2526164	between_species_paralog	3	2	IPR011701	MFS_1
LOC_Os01g50820	29187805	29189920	AT1G08090	2524076	2526164	between_species_paralog	4	2	IPR011701	MFS_1
LOC_Os01g36720	20385150	20387472	AT1G08100	2527170	2529120	between_species_paralog	3	2	IPR011701	MFS_1
LOC_Os01g50820	29187805	29189920	AT1G08100	2527170	2529120	between_species_paralog	4	2	IPR011701	MFS_1
LOC_Os01g37750	21113692	21114746	AT1G10370	3397081	3398358	ortholog_many2many	5	4	IPR004046	GST_C
LOC_Os01g49710	28565580	28566618	AT1G10370	3397081	3398358	ortholog_many2many	6	3	IPR004045	Glutathione_S-Trfase_N
LOC_Os01g49720	28567676	28568747	AT1G10370	3397081	3398358	ortholog_many2many	5	3	IPR004045	Glutathione_S-Trfase_N
LOC_Os01g72120	41838906	41840397	AT1G10370	3397081	3398358	ortholog_many2many	5	4	IPR004046	GST_C
LOC_Os01g72130	41840717	41841506	AT1G10370	3397081	3398358	ortholog_many2many	5	4	IPR004046	GST_C
LOC_Os01g72140	41842966	41844648	AT1G10370	3397081	3398358	ortholog_many2many	6	3	IPR004045	Glutathione_S-Trfase_N
LOC_Os01g72150	41845370	41846327	AT1G10370	3397081	3398358	ortholog_many2many	4	4	IPR004046	GST_C
LOC_Os01g72160	41846662	41848037	AT1G10370	3397081	3398358	ortholog_many2many	5	4	IPR004046	GST_C
LOC_Os01g72170	41852807	41853840	AT1G10370	3397081	3398358	ortholog_many2many	5	4	IPR004046	GST_C
LOC_Os01g04750	2153326	2154994	AT1G13260	4542168	4543742	between_species_paralog	4	3	IPR016177	DNA-bd_integrase-typ
LOC_Os01g04800	2201264	2202860	AT1G13260	4542168	4543742	between_species_paralog	4	3	IPR016177	DNA-bd_integrase-typ
LOC_Os01g49830	28618439	28620073	AT1G13260	4542168	4543742	ortholog_many2many	4	3	IPR001471	TF_ERF_DNA-bd
LOC_Os01g13229	7368672	7373369	AT1G15570	5362009	5365549	between_species_paralog	6	4	IPR004367	Cyclin_C
LOC_Os01g13260	7388342	7392708	AT1G15570	5362009	5365549	between_species_paralog	8	5	IPR004367	Cyclin_C
LOC_Os01g26174	14824118	14827241	AT1G21210	7424106	7427041	ortholog_many2many	15	7	IPR002290	Ser_thr_pkinase
LOC_Os01g26270	14891850	14892917	AT1G21210	7424106	7427041	ortholog_many2many	11	2	IPR001881	EGF_Ca_bd
LOC_Os01g26280	14895659	14898152	AT1G21210	7424106	7427041	ortholog_many2many	14	7	IPR002290	Ser_thr_pkinase
LOC_Os01g65920	38274012	38277987	AT1G21410	7497141	7499579	ortholog_many2many	4	1	IPR006553	Leu-rich_rpt_Cys-con_subtyp
LOC_Os01g46750	26627845	26635905	AT1G49430	18291043	18295825	between_species_paralog	3	2	IPR000873	AMP-dep_Synth/Lig
LOC_Os01g63770	36997295	37003753	AT1G77690	29200941	29203340	between_species_paralog	2	1	IPR013057	AA_transpt_TM
LOC_Os01g50680	29103839	29108090	AT2G04160	1401268	1407745	between_species_paralog	4	2	IPR000209	Peptidase_S8/S53
LOC_Os01g52750	30343035	30347971	AT2G04160	1401268	1407745	between_species_paralog	4	3	IPR000209	Peptidase_S8/S53
LOC_Os01g58240	33658738	33671494	AT2G04160	1401268	1407745	between_species_paralog	4	3	IPR000209	Peptidase_S8/S53
LOC_Os01g58270	33673361	33678673	AT2G04160	1401268	1407745	between_species_paralog	4	3	IPR000209	Peptidase_S8/S53
LOC_Os01g58280	33683734	33687181	AT2G04160	1401268	1407745	between_species_paralog	4	3	IPR000209	Peptidase_S8/S53
LOC_Os01g58290	33690729	33695702	AT2G04160	1401268	1407745	between_species_paralog	4	3	IPR000209	Peptidase_S8/S53
LOC_Os01g63770	36997295	37003753	AT2G38120	15972993	15977180	ortholog_many2many	2	1	IPR013057	AA_transpt_TM
LOC_Os01g01470	240641	242468	AT3G15170	5109883	5111447	between_species_paralog	2	1	IPR003441	NAM
LOC_Os01g29840	16719478	16721591	AT3G15170	5109883	5111447	between_species_paralog	3	1	IPR003441	NAM
LOC_Os01g74470	43124919	43133458	AT3G28860	10870038	10877506	between_species_paralog	5	3	IPR003439	ABC_transporter-like
LOC_Os01g11200	5999333	6001858	AT3G50060	18557970	18559106	between_species_paralog	5	3	IPR001005	SANT_DNA-bd
LOC_Os01g74590	43192976	43193852	AT3G50060	18557970	18559106	between_species_paralog	5	3	IPR001005	SANT_DNA-bd
LOC_Os01g08320	4072676	4075438	AT4G14550	8347822	8350019	between_species_paralog	3	1	IPR003311	AUX_IAA
LOC_Os01g09450	4815845	4817962	AT4G14550	8347822	8350019	between_species_paralog	3	1	IPR003311	AUX_IAA
LOC_Os01g13030	7248761	7253629	AT4G14550	8347822	8350019	between_species_paralog	4	1	IPR003311	AUX_IAA
LOC_Os01g48444	27776462	27779934	AT4G14550	8347822	8350019	between_species_paralog	3	1	IPR003311	AUX_IAA
LOC_Os01g53880	30974721	30978726	AT4G14550	8347822	8350019	between_species_paralog	3	1	IPR003311	AUX_IAA
LOC_Os01g10820	5769018	5771375	AT4G18730	10302163	10303382	ortholog_many2many	3	1	IPR002132	Ribosomal_L5
LOC_Os01g18880	10674143	10678804	AT4G33495	16110712	16112597	between_species_paralog	2	1	IPR001578	Peptidase_C12
LOC_Os01g43040	24550911	24554535	AT4G33495	16110712	16112597	ortholog_one2one	3	0
LOC_Os01g67310	39065132	39067608	AT4G37070	17464785	17467109	between_species_paralog	3	2	IPR016035	Acyl_Trfase/lysoPlipase
LOC_Os01g08710	4339849	4355468	AT5G13080	4149740	4151150	between_species_paralog	4	1	IPR003657	WRKY_DNA_bd
LOC_Os01g43650	25008409	25011192	AT5G13080	4149740	4151150	between_species_paralog	2	1	IPR003657	WRKY_DNA_bd
LOC_Os01g47560	27195373	27199946	AT5G13080	4149740	4151150	between_species_paralog	2	1	IPR003657	WRKY_DNA_bd
LOC_Os01g53260	30603251	30607033	AT5G13080	4149740	4151150	between_species_paralog	2	1	IPR003657	WRKY_DNA_bd
LOC_Os01g62510	36187659	36190638	AT5G13080	4149740	4151150	between_species_paralog	2	1	IPR003657	WRKY_DNA_bd
LOC_Os01g62514	36192797	36193568	AT5G13080	4149740	4151150	between_species_paralog	2	1	IPR003657	WRKY_DNA_bd
LOC_Os01g74140	42945709	42947706	AT5G13080	4149740	4151150	between_species_paralog	2	1	IPR003657	WRKY_DNA_bd
LOC_Os01g08320	4072676	4075438	AT5G25890	9033415	9034834	between_species_paralog	3	1	IPR003311	AUX_IAA
LOC_Os01g09450	4815845	4817962	AT5G25890	9033415	9034834	between_species_paralog	3	1	IPR003311	AUX_IAA
LOC_Os01g13030	7248761	7253629	AT5G25890	9033415	9034834	between_species_paralog	4	1	IPR003311	AUX_IAA
LOC_Os01g48444	27776462	27779934	AT5G25890	9033415	9034834	between_species_paralog	3	1	IPR003311	AUX_IAA
LOC_Os01g53880	30974721	30978726	AT5G25890	9033415	9034834	ortholog_one2many	3	1	IPR003311	AUX_IAA
LOC_Os01g24070	13569581	13572296	AT5G26930	9479466	9480200	ortholog_many2many	2	1	IPR000679	Znf_GATA
LOC_Os01g47360	27054916	27055805	AT5G26930	9479466	9480200	between_species_paralog	3	1	IPR000679	Znf_GATA
LOC_Os01g74540	43171050	43172134	AT5G26930	9479466	9480200	ortholog_many2many	3	1	IPR000679	Znf_GATA
LOC_Os01g39020	21937820	21940794	AT5G45710	18540850	18542863	between_species_paralog	2	1	IPR000232	HSF_DNA_bd
LOC_Os01g43590	24966354	24968003	AT5G45710	18540850	18542863	between_species_paralog	2	1	IPR000232	HSF_DNA_bd
LOC_Os01g53220	30581441	30582699	AT5G45710	18540850	18542863	between_species_paralog	2	1	IPR000232	HSF_DNA_bd
LOC_Os01g54550	31369181	31371715	AT5G45710	18540850	18542863	ortholog_many2many	2	1	IPR000232	HSF_DNA_bd
LOC_Os01g74320	43062696	43064440	AT5G57740	23394585	23397650	between_species_paralog	5	2	IPR001841	Znf_RING
LOC_Os01g08160	3952039	3954491	AT1G13300	4556892	4558708	between_species_paralog	5	3	IPR006447	SHAQKYF_myb_bd
LOC_Os01g07500	3576466	3580859	AT1G23320	8273423	8275350	ortholog_many2many	3	2	IPR006948	Alliinase_C
LOC_Os01g07500	3576466	3580859	AT1G70560	26604855	26607503	ortholog_many2many	3	2	IPR006948	Alliinase_C
LOC_Os01g67770	39386187	39390058	AT2G25180	10724301	10726961	between_species_paralog	7	6	IPR017053	Response_reg_B-typ_pln
LOC_Os01g67770	39386187	39390058	AT3G16857	5755821	5759443	between_species_paralog	7	6	IPR017053	Response_reg_B-typ_pln
LOC_Os01g07500	3576466	3580859	AT4G24670	12727834	12731274	ortholog_many2many	3	2	IPR006948	Alliinase_C
LOC_Os01g67770	39386187	39390058	AT4G31920	15444117	15446959	between_species_paralog	7	6	IPR017053	Response_reg_B-typ_pln
LOC_Os01g64310	37333177	37335186	AT1G26870	9312856	9314983	between_species_paralog	3	1	IPR003441	NAM
LOC_Os01g66490	38610392	38613014	AT1G26870	9312856	9314983	between_species_paralog	2	1	IPR003441	NAM
LOC_Os01g63770	36997295	37003753	AT1G77690	29200941	29203340	between_species_paralog	2	1	IPR013057	AA_transpt_TM
LOC_Os01g63770	36997295	37003753	AT2G21050	9034090	9036636	between_species_paralog	2	1	IPR013057	AA_transpt_TM
LOC_Os01g63770	36997295	37003753	AT2G38120	15972993	15977180	ortholog_many2many	2	1	IPR013057	AA_transpt_TM
LOC_Os01g63770	36997295	37003753	AT5G01240	97894	101835	ortholog_many2many	2	1	IPR013057	AA_transpt_TM
LOC_Os01g08320	4072676	4075438	AT1G04550	1240375	1242121	between_species_paralog	3	1	IPR003311	AUX_IAA
LOC_Os01g09450	4815845	4817962	AT1G04550	1240375	1242121	between_species_paralog	3	1	IPR003311	AUX_IAA
LOC_Os01g13030	7248761	7253629	AT1G04550	1240375	1242121	between_species_paralog	4	1	IPR003311	AUX_IAA
LOC_Os01g48444	27776462	27779934	AT1G04550	1240375	1242121	between_species_paralog	3	1	IPR003311	AUX_IAA
LOC_Os01g53880	30974721	30978726	AT1G04550	1240375	1242121	between_species_paralog	3	1	IPR003311	AUX_IAA
LOC_Os01g11580	6246411	6252398	AT1G06230	1906963	1910848	ortholog_many2many	2	1	IPR001487	Bromodomain
LOC_Os01g46040	26172141	26176186	AT1G06230	1906963	1910848	between_species_paralog	2	1	IPR001487	Bromodomain
LOC_Os01g36720	20385150	20387472	AT1G08090	2524076	2526164	between_species_paralog	3	2	IPR011701	MFS_1
LOC_Os01g50820	29187805	29189920	AT1G08090	2524076	2526164	between_species_paralog	4	2	IPR011701	MFS_1
LOC_Os01g36720	20385150	20387472	AT1G08090	2524076	2526164	between_species_paralog	3	2	IPR011701	MFS_1
LOC_Os01g50820	29187805	29189920	AT1G08090	2524076	2526164	between_species_paralog	4	2	IPR011701	MFS_1
LOC_Os01g36720	20385150	20387472	AT1G08100	2527170	2529120	between_species_paralog	3	2	IPR011701	MFS_1
LOC_Os01g50820	29187805	29189920	AT1G08100	2527170	2529120	between_species_paralog	4	2	IPR011701	MFS_1
LOC_Os01g37750	21113692	21114746	AT1G10370	3397081	3398358	ortholog_many2many	5	4	IPR004046	GST_C
LOC_Os01g49710	28565580	28566618	AT1G10370	3397081	3398358	ortholog_many2many	6	3	IPR004045	Glutathione_S-Trfase_N
LOC_Os01g49720	28567676	28568747	AT1G10370	3397081	3398358	ortholog_many2many	5	3	IPR004045	Glutathione_S-Trfase_N
LOC_Os01g72120	41838906	41840397	AT1G10370	3397081	3398358	ortholog_many2many	5	4	IPR004046	GST_C
LOC_Os01g72130	41840717	41841506	AT1G10370	3397081	3398358	ortholog_many2many	5	4	IPR004046	GST_C
LOC_Os01g72140	41842966	41844648	AT1G10370	3397081	3398358	ortholog_many2many	6	3	IPR004045	Glutathione_S-Trfase_N
LOC_Os01g72150	41845370	41846327	AT1G10370	3397081	3398358	ortholog_many2many	4	4	IPR004046	GST_C
LOC_Os01g72160	41846662	41848037	AT1G10370	3397081	3398358	ortholog_many2many	5	4	IPR004046	GST_C
LOC_Os01g72170	41852807	41853840	AT1G10370	3397081	3398358	ortholog_many2many	5	4	IPR004046	GST_C
LOC_Os01g04750	2153326	2154994	AT1G13260	4542168	4543742	between_species_paralog	4	3	IPR016177	DNA-bd_integrase-typ
LOC_Os01g04800	2201264	2202860	AT1G13260	4542168	4543742	between_species_paralog	4	3	IPR016177	DNA-bd_integrase-typ
LOC_Os01g49830	28618439	28620073	AT1G13260	4542168	4543742	ortholog_many2many	4	3	IPR001471	TF_ERF_DNA-bd
LOC_Os01g63980	37145874	37148157	AT1G13290	4550153	4551620	between_species_paralog	3	2	IPR015880	Znf_C2H2-like
LOC_Os01g08160	3952039	3954491	AT1G13300	4556892	4558708	between_species_paralog	5	3	IPR006447	SHAQKYF_myb_bd
LOC_Os01g26174	14824118	14827241	AT1G21210	7424106	7427041	ortholog_many2many	15	7	IPR002290	Ser_thr_pkinase
LOC_Os01g26270	14891850	14892917	AT1G21210	7424106	7427041	ortholog_many2many	11	2	IPR001881	EGF_Ca_bd
LOC_Os01g26280	14895659	14898152	AT1G21210	7424106	7427041	ortholog_many2many	14	7	IPR002290	Ser_thr_pkinase
LOC_Os01g45550	25862658	25867317	AT1G23080	8180577	8183570	ortholog_many2many	3	2	IPR014024	Auxin_eff_sub
LOC_Os01g51780	29774744	29777428	AT1G23080	8180577	8183570	between_species_paralog	3	1	IPR004776	Auxin_eff
LOC_Os01g58860	34002620	34005416	AT1G23080	8180577	8183570	between_species_paralog	3	1	IPR004776	Auxin_eff
LOC_Os01g69070	40135182	40141721	AT1G23080	8180577	8183570	between_species_paralog	3	1	IPR004776	Auxin_eff
LOC_Os01g07500	3576466	3580859	AT1G23320	8273423	8275350	ortholog_many2many	3	2	IPR006948	Alliinase_C
LOC_Os01g13460	7494057	7497391	AT1G32640	11798810	11800988	between_species_paralog	3	2	IPR001092	HLH_basic
LOC_Os01g50940	29270113	29272225	AT1G32640	11798810	11800988	between_species_paralog	3	2	IPR001092	HLH_basic
LOC_Os01g49290	28329756	28332348	AT1G48630	17981773	17983327	ortholog_many2many	9	4	IPR001680	WD40_repeat
LOC_Os01g67410	39140087	39144436	AT1G51190	18977284	18980618	between_species_paralog	3	2	IPR001471	TF_ERF_DNA-bd
LOC_Os01g48410	27741182	27744192	AT1G52240	19455766	19459586	ortholog_many2many	3	1	IPR005512	Rop_nucl_exchang_PRONE
LOC_Os01g55520	31985455	31988193	AT1G52240	19455766	19459586	ortholog_many2many	3	1	IPR005512	Rop_nucl_exchang_PRONE
LOC_Os01g62990	36484542	36488674	AT1G52240	19455766	19459586	between_species_paralog	3	1	IPR005512	Rop_nucl_exchang_PRONE
LOC_Os01g48140	27564788	27569429	AT1G53330	19896027	19897442	between_species_paralog	2	1	IPR002885	Pentatricopeptide_repeat
LOC_Os01g07940	3834129	3837211	AT1G53700	20048586	20050115	between_species_paralog	8	4	IPR002290	Ser_thr_pkinase
LOC_Os01g22900	12869202	12873238	AT1G56560	21192499	21195112	ortholog_many2many	5	2	IPR006937	Invertase_neut
LOC_Os01g51320	29512239	29513873	AT1G62830	23264490	23267202	between_species_paralog	7	1	IPR002937	Amino_oxidase
LOC_Os01g07500	3576466	3580859	AT1G70560	26604855	26607503	ortholog_many2many	3	2	IPR006948	Alliinase_C
LOC_Os01g45550	25862658	25867317	AT1G70940	26743054	26746395	ortholog_many2many	3	2	IPR014024	Auxin_eff_sub
LOC_Os01g51780	29774744	29777428	AT1G70940	26743054	26746395	between_species_paralog	3	1	IPR004776	Auxin_eff
LOC_Os01g58860	34002620	34005416	AT1G70940	26743054	26746395	between_species_paralog	3	1	IPR004776	Auxin_eff
LOC_Os01g69070	40135182	40141721	AT1G70940	26743054	26746395	between_species_paralog	3	1	IPR004776	Auxin_eff
LOC_Os01g10504	5558548	5567844	AT1G71692	26952645	26955127	between_species_paralog	3	2	IPR002100	TF_MADSbox
LOC_Os01g45550	25862658	25867317	AT1G73590	27659673	27663178	between_species_paralog	3	2	IPR014024	Auxin_eff_sub
LOC_Os01g51780	29774744	29777428	AT1G73590	27659673	27663178	between_species_paralog	3	1	IPR004776	Auxin_eff
LOC_Os01g58860	34002620	34005416	AT1G73590	27659673	27663178	between_species_paralog	3	1	IPR004776	Auxin_eff
LOC_Os01g69070	40135182	40141721	AT1G73590	27659673	27663178	between_species_paralog	3	1	IPR004776	Auxin_eff
LOC_Os01g45550	25862658	25867317	AT2G01420	180105	183328	ortholog_many2many	3	2	IPR014024	Auxin_eff_sub
LOC_Os01g51780	29774744	29777428	AT2G01420	180105	183328	between_species_paralog	3	1	IPR004776	Auxin_eff
LOC_Os01g58860	34002620	34005416	AT2G01420	180105	183328	between_species_paralog	3	1	IPR004776	Auxin_eff
LOC_Os01g69070	40135182	40141721	AT2G01420	180105	183328	between_species_paralog	3	1	IPR004776	Auxin_eff
LOC_Os01g02040	553022	557015	AT2G18470	8005285	8008052	between_species_paralog	13	4	IPR002290	Ser_thr_pkinase
LOC_Os01g12720	7037103	7041925	AT2G18470	8005285	8008052	between_species_paralog	10	4	IPR002290	Ser_thr_pkinase
LOC_Os01g53640	30817898	30822203	AT2G18470	8005285	8008052	between_species_paralog	11	4	IPR002290	Ser_thr_pkinase
LOC_Os01g54700	31472853	31476555	AT2G18470	8005285	8008052	between_species_paralog	12	4	IPR002290	Ser_thr_pkinase
LOC_Os01g67770	39386187	39390058	AT2G25180	10724301	10726961	between_species_paralog	7	6	IPR017053	Response_reg_B-typ_pln
LOC_Os01g64560	37456410	37462708	AT2G27230	11650358	11654143	ortholog_one2many	3	2	IPR001092	HLH_basic
LOC_Os01g62900	36429935	36439800	AT2G39800	16598072	16603319	ortholog_many2many	9	6	IPR001057	Glu_5kinase
LOC_Os01g18360	10311317	10313802	AT2G46990	19307855	19308990	ortholog_many2many	4	1	IPR003311	AUX_IAA
LOC_Os01g26160	14808650	14821107	AT3G05040	1401271	1408197	ortholog_one2many	3	2	IPR013598	Exportin-1/Importin-b-like
LOC_Os01g20860	11624632	11636050	AT3G05630	1635200	1640348	ortholog_many2many	5	2	IPR016555	PLipase_D_euk
LOC_Os01g07940	3834129	3837211	AT3G14370	4797845	4799504	between_species_paralog	8	4	IPR002290	Ser_thr_pkinase
LOC_Os01g01470	240641	242468	AT3G15170	5109883	5111447	between_species_paralog	2	1	IPR003441	NAM
LOC_Os01g29840	16719478	16721591	AT3G15170	5109883	5111447	between_species_paralog	3	1	IPR003441	NAM
LOC_Os01g20860	11624632	11636050	AT3G16785	5711082	5719023	ortholog_many2many	5	2	IPR016555	PLipase_D_euk
LOC_Os01g67770	39386187	39390058	AT3G16857	5755821	5759443	between_species_paralog	7	6	IPR017053	Response_reg_B-typ_pln
LOC_Os01g18360	10311317	10313802	AT3G17600	6020025	6021142	ortholog_many2many	4	1	IPR003311	AUX_IAA
LOC_Os01g50030	28738942	28743717	AT3G18000	6154363	6157552	ortholog_many2many	7	4	IPR004033	UbiE/COQ5_MeTrFase
LOC_Os01g50032	28739191	28743429	AT3G18000	6154363	6157552	ortholog_many2many	7	4	IPR004033	UbiE/COQ5_MeTrFase
LOC_Os01g49290	28329756	28332348	AT3G18130	6210904	6212433	ortholog_many2many	9	4	IPR001680	WD40_repeat
LOC_Os01g67410	39140087	39144436	AT3G20840	7300675	7303693	between_species_paralog	3	2	IPR001471	TF_ERF_DNA-bd
LOC_Os01g06640	3127992	3129722	AT3G25710	9369519	9371394	between_species_paralog	3	2	IPR001092	HLH_basic
LOC_Os01g11910	6461706	6464037	AT3G25710	9369519	9371394	between_species_paralog	3	2	IPR001092	HLH_basic
LOC_Os01g74470	43124919	43133458	AT3G28860	10870038	10877506	between_species_paralog	5	3	IPR003439	ABC_transporter-like
LOC_Os01g11200	5999333	6001858	AT3G50060	18557970	18559106	between_species_paralog	5	3	IPR001005	SANT_DNA-bd
LOC_Os01g74590	43192976	43193852	AT3G50060	18557970	18559106	between_species_paralog	5	3	IPR001005	SANT_DNA-bd
LOC_Os01g24010	13516492	13527454	AT3G53480	19825307	19831797	possible_ortholog	6	4	IPR003439	ABC_transporter-like
LOC_Os01g42350	24046500	24054874	AT3G53480	19825307	19831797	possible_ortholog	6	4	IPR003439	ABC_transporter-like
LOC_Os01g42380	24074021	24081137	AT3G53480	19825307	19831797	possible_ortholog	7	4	IPR003439	ABC_transporter-like
LOC_Os01g42410	24106036	24114099	AT3G53480	19825307	19831797	possible_ortholog	6	4	IPR003439	ABC_transporter-like
LOC_Os01g53800	30921725	30926382	AT3G54720	20254725	20257848	between_species_paralog	4	2	IPR007484	Peptidase_M28
LOC_Os01g53810	30932190	30936331	AT3G54720	20254725	20257848	between_species_paralog	4	3	IPR007365	Transferrin_rcpt-like_dimerise
LOC_Os01g54010	31064077	31069104	AT3G54720	20254725	20257848	between_species_paralog	4	3	IPR007365	Transferrin_rcpt-like_dimerise
LOC_Os01g18360	10311317	10313802	AT3G62100	22995791	22996761	ortholog_many2many	4	1	IPR003311	AUX_IAA
LOC_Os01g10320	5425518	5429614	AT4G00730	299359	304508	between_species_paralog	6	1	IPR002913	START_lipid_bd
LOC_Os01g55549	32005330	32008740	AT4G00730	299359	304508	between_species_paralog	9	3	IPR001356	Homeobox
LOC_Os01g57890	33470856	33477491	AT4G00730	299359	304508	between_species_paralog	7	3	IPR001356	Homeobox
LOC_Os01g45570	25879160	25882674	AT4G16780	9449114	9450743	between_species_paralog	8	4	IPR000047	HTH_lambrepressr
LOC_Os01g04020	1745416	1747549	AT4G23750	12376194	12378024	ortholog_many2many	4	2	IPR016177	DNA-bd_integrase-typ
LOC_Os01g12440	6812714	6814546	AT4G23750	12376194	12378024	ortholog_many2many	3	2	IPR001471	TF_ERF_DNA-bd
LOC_Os01g46870	26732970	26734472	AT4G23750	12376194	12378024	ortholog_many2many	3	2	IPR001471	TF_ERF_DNA-bd
LOC_Os01g35184	19468217	19476561	AT4G24400	12617256	12620684	ortholog_one2one	11	5	IPR002290	Ser_thr_pkinase
LOC_Os01g07500	3576466	3580859	AT4G24670	12727834	12731274	ortholog_many2many	3	2	IPR006948	Alliinase_C
LOC_Os01g67770	39386187	39390058	AT4G31920	15444117	15446959	between_species_paralog	7	6	IPR017053	Response_reg_B-typ_pln
LOC_Os01g37690	21070325	21075685	AT5G01490	195541	198524	ortholog_many2many	4	3	IPR004713	CaH_exchang
LOC_Os01g14010	7846742	7849177	AT5G03150	745644	749007	ortholog_many2many	4	2	IPR015880	Znf_C2H2-like
LOC_Os01g39110	21991827	21996000	AT5G03150	745644	749007	between_species_paralog	4	2	IPR015880	Znf_C2H2-like
LOC_Os01g70870	41010263	41014020	AT5G03150	745644	749007	ortholog_many2many	4	2	IPR015880	Znf_C2H2-like
LOC_Os01g62130	35964906	35965903	AT5G04340	1216131	1217106	between_species_paralog	3	2	IPR015880	Znf_C2H2-like
LOC_Os01g62190	36000198	36001060	AT5G04340	1216131	1217106	between_species_paralog	3	2	IPR015880	Znf_C2H2-like
LOC_Os01g64280	37314248	37319474	AT5G06140	1856008	1858785	ortholog_one2one	3	2	IPR001683	PX
LOC_Os01g64630	37508842	37512326	AT5G09810	3052097	3054614	between_species_paralog	3	1	IPR004000	Actin-like
LOC_Os01g73310	42483029	42486407	AT5G09810	3052097	3054614	between_species_paralog	3	1	IPR004000	Actin-like
LOC_Os01g67410	39140087	39144436	AT5G10510	3315529	3320202	between_species_paralog	3	2	IPR001471	TF_ERF_DNA-bd
LOC_Os01g72490	42036124	42038579	AT5G12330	3987375	3989833	ortholog_many2many	5	3	IPR006511	LRP1_C
LOC_Os01g08710	4339849	4355468	AT5G13080	4149740	4151150	between_species_paralog	4	1	IPR003657	WRKY_DNA_bd
LOC_Os01g43650	25008409	25011192	AT5G13080	4149740	4151150	between_species_paralog	2	1	IPR003657	WRKY_DNA_bd
LOC_Os01g47560	27195373	27199946	AT5G13080	4149740	4151150	between_species_paralog	2	1	IPR003657	WRKY_DNA_bd
LOC_Os01g53260	30603251	30607033	AT5G13080	4149740	4151150	between_species_paralog	2	1	IPR003657	WRKY_DNA_bd
LOC_Os01g62510	36187659	36190638	AT5G13080	4149740	4151150	between_species_paralog	2	1	IPR003657	WRKY_DNA_bd
LOC_Os01g62514	36192797	36193568	AT5G13080	4149740	4151150	between_species_paralog	2	1	IPR003657	WRKY_DNA_bd
LOC_Os01g74140	42945709	42947706	AT5G13080	4149740	4151150	between_species_paralog	2	1	IPR003657	WRKY_DNA_bd
LOC_Os01g13530	7556172	7559626	AT5G24310	8273546	8276526	ortholog_many2many	1	0
LOC_Os01g37110	20713093	20715663	AT5G24310	8273546	8276526	ortholog_many2many	1	0
LOC_Os01g43420	24842686	24845871	AT5G24310	8273546	8276526	between_species_paralog	1	0
LOC_Os01g55560	32009433	32012376	AT5G24310	8273546	8276526	between_species_paralog	1	0
LOC_Os01g24070	13569581	13572296	AT5G26930	9479466	9480200	ortholog_many2many	2	1	IPR000679	Znf_GATA
LOC_Os01g47360	27054916	27055805	AT5G26930	9479466	9480200	between_species_paralog	3	1	IPR000679	Znf_GATA
LOC_Os01g74540	43171050	43172134	AT5G26930	9479466	9480200	ortholog_many2many	3	1	IPR000679	Znf_GATA
LOC_Os01g39020	21937820	21940794	AT5G45710	18540850	18542863	between_species_paralog	2	1	IPR000232	HSF_DNA_bd
LOC_Os01g43590	24966354	24968003	AT5G45710	18540850	18542863	between_species_paralog	2	1	IPR000232	HSF_DNA_bd
LOC_Os01g53220	30581441	30582699	AT5G45710	18540850	18542863	between_species_paralog	2	1	IPR000232	HSF_DNA_bd
LOC_Os01g54550	31369181	31371715	AT5G45710	18540850	18542863	ortholog_many2many	2	1	IPR000232	HSF_DNA_bd
LOC_Os01g10040	5235623	5243520	AT5G48000	19444138	19447850	between_species_paralog	8	4	IPR002397	Cyt_P450_B
LOC_Os01g06580	3096346	3097527	AT5G55730	22558148	22560461	between_species_paralog	3	1	IPR000782	FAS1_domain
LOC_Os01g47780	27339855	27340906	AT5G55730	22558148	22560461	between_species_paralog	3	1	IPR000782	FAS1_domain
LOC_Os01g62380	36098359	36103250	AT5G55730	22558148	22560461	between_species_paralog	2	1	IPR000782	FAS1_domain
LOC_Os01g67410	39140087	39144436	AT5G57390	23253459	23256450	between_species_paralog	3	2	IPR001471	TF_ERF_DNA-bd
LOC_Os01g56420	32522284	32523139	AT5G59030	23833728	23834511	ortholog_many2many	2	1	IPR007274	Cop_transporter
LOC_Os01g56430	32525246	32525898	AT5G59030	23833728	23834511	ortholog_many2many	2	1	IPR007274	Cop_transporter
LOC_Os01g09720	5013609	5014256	AT5G60200	24240975	24242523	between_species_paralog	2	1	IPR003851	Znf_Dof
LOC_Os01g64590	37471333	37472325	AT5G60200	24240975	24242523	between_species_paralog	2	1	IPR003851	Znf_Dof
LOC_Os01g57420	33184286	33191935	AT5G63770	25518641	25523621	between_species_paralog	5	2	IPR001206	Diacylglycerol_kinase_cat
LOC_Os01g40200	22682498	22686999	AT1G04160	1086495	1096146	between_species_paralog	7	2	IPR000048	IQ_CaM_bd_region
LOC_Os01g51632	29661387	29666935	AT1G04160	1086495	1096146	between_species_paralog	9	2	IPR000048	IQ_CaM_bd_region
LOC_Os01g14650	8195003	8196164	AT1G12560	4276519	4277899	between_species_paralog	8	5	IPR005132	RlpA
LOC_Os01g14660	8200896	8201798	AT1G12560	4276519	4277899	between_species_paralog	7	5	IPR005132	RlpA
LOC_Os01g16770	9525163	9525960	AT1G12560	4276519	4277899	between_species_paralog	7	5	IPR005132	RlpA
LOC_Os01g60770	35144473	35146295	AT1G12560	4276519	4277899	between_species_paralog	9	5	IPR005132	RlpA
LOC_Os01g04330	1929994	1930904	AT1G24620	8723712	8724459	between_species_paralog	7	3	IPR003299	Calflagin_bd
LOC_Os01g56030	32257870	32258982	AT1G24620	8723712	8724459	between_species_paralog	7	2	IPR002048	EF_hand_Ca_bd
LOC_Os01g72080	41817236	41818446	AT1G24620	8723712	8724459	between_species_paralog	7	2	IPR002048	EF_hand_Ca_bd
LOC_Os01g72100	41824839	41826113	AT1G24620	8723712	8724459	between_species_paralog	8	3	IPR002048	EF_hand_Ca_bd
LOC_Os01g72530	42072941	42073939	AT1G24620	8723712	8724459	between_species_paralog	7	3	IPR002048	EF_hand_Ca_bd
LOC_Os01g72540	42077639	42078094	AT1G24620	8723712	8724459	between_species_paralog	8	3	IPR002048	EF_hand_Ca_bd
LOC_Os01g72550	42079073	42079513	AT1G24620	8723712	8724459	between_species_paralog	7	3	IPR002048	EF_hand_Ca_bd
LOC_Os01g64630	37508842	37512326	AT1G49240	18215872	18218313	between_species_paralog	3	1	IPR004000	Actin-like
LOC_Os01g73310	42483029	42486407	AT1G49240	18215872	18218313	between_species_paralog	3	1	IPR004000	Actin-like
LOC_Os01g48410	27741182	27744192	AT1G52240	19455766	19459586	ortholog_many2many	3	1	IPR005512	Rop_nucl_exchang_PRONE
LOC_Os01g55520	31985455	31988193	AT1G52240	19455766	19459586	ortholog_many2many	3	1	IPR005512	Rop_nucl_exchang_PRONE
LOC_Os01g62990	36484542	36488674	AT1G52240	19455766	19459586	between_species_paralog	3	1	IPR005512	Rop_nucl_exchang_PRONE
LOC_Os01g02110	602643	604643	AT1G66470	24795214	24796988	ortholog_many2many	3	2	IPR001092	HLH_basic
LOC_Os01g45550	25862658	25867317	AT1G70940	26743054	26746395	ortholog_many2many	3	2	IPR014024	Auxin_eff_sub
LOC_Os01g51780	29774744	29777428	AT1G70940	26743054	26746395	between_species_paralog	3	1	IPR004776	Auxin_eff
LOC_Os01g58860	34002620	34005416	AT1G70940	26743054	26746395	between_species_paralog	3	1	IPR004776	Auxin_eff
LOC_Os01g69070	40135182	40141721	AT1G70940	26743054	26746395	between_species_paralog	3	1	IPR004776	Auxin_eff
LOC_Os01g65440	37981806	37984667	AT2G03720	1132170	1133379	between_species_paralog	2	1	IPR006016	UspA
LOC_Os01g11250	6016742	6021156	AT2G26650	11331850	11336607	between_species_paralog	8	4	IPR000595	cNMP_bd
LOC_Os01g45990	26118664	26125121	AT2G26650	11331850	11336607	ortholog_one2many	8	6	IPR000595	cNMP_bd
LOC_Os01g52070	29942865	29947609	AT2G26650	11331850	11336607	between_species_paralog	8	5	IPR000595	cNMP_bd
LOC_Os01g55200	31760179	31762843	AT2G26650	11331850	11336607	between_species_paralog	8	5	IPR000595	cNMP_bd
LOC_Os01g07940	3834129	3837211	AT2G34650	14589760	14591788	between_species_paralog	8	4	IPR002290	Ser_thr_pkinase
LOC_Os01g64630	37508842	37512326	AT2G37620	15779174	15781561	between_species_paralog	3	1	IPR004000	Actin-like
LOC_Os01g73310	42483029	42486407	AT2G37620	15779174	15781561	between_species_paralog	3	1	IPR004000	Actin-like
LOC_Os01g63770	36997295	37003753	AT2G38120	15972993	15977180	ortholog_many2many	2	1	IPR013057	AA_transpt_TM
LOC_Os01g48410	27741182	27744192	AT2G45890	18883473	18885566	between_species_paralog	2	1	IPR005512	Rop_nucl_exchang_PRONE
LOC_Os01g55520	31985455	31988193	AT2G45890	18883473	18885566	between_species_paralog	2	1	IPR005512	Rop_nucl_exchang_PRONE
LOC_Os01g62990	36484542	36488674	AT2G45890	18883473	18885566	between_species_paralog	2	1	IPR005512	Rop_nucl_exchang_PRONE
LOC_Os01g18670	10514699	10520258	AT2G47000	19309868	19315241	ortholog_one2many	6	3	IPR003439	ABC_transporter-like
LOC_Os01g74630	43219178	43220210	AT2G47000	19309868	19315241	ortholog_one2many	7	0
LOC_Os01g07920	3826039	3829347	AT3G06300	1907582	1909804	between_species_paralog	4	2	IPR006620	Pro_4_hyd_alph
LOC_Os01g64630	37508842	37512326	AT3G18780	6474842	6477204	between_species_paralog	3	1	IPR004000	Actin-like
LOC_Os01g73310	42483029	42486407	AT3G18780	6474842	6477204	between_species_paralog	3	1	IPR004000	Actin-like
LOC_Os01g08200	3985612	3994398	AT3G20630	7202773	7208402	ortholog_one2one	7	5	IPR000449	UBA/transl_elong_EF1B_N
LOC_Os01g06640	3127992	3129722	AT3G25710	9369519	9371394	between_species_paralog	3	2	IPR001092	HLH_basic
LOC_Os01g11910	6461706	6464037	AT3G25710	9369519	9371394	between_species_paralog	3	2	IPR001092	HLH_basic
LOC_Os01g67980	39500287	39501935	AT3G43960	15774055	15775657	between_species_paralog	4	2	IPR013201	Prot_inhib_I29
LOC_Os01g73980	42854613	42856422	AT3G43960	15774055	15775657	between_species_paralog	5	2	IPR013201	Prot_inhib_I29
LOC_Os01g59920	34645994	34649728	AT3G61440	22735663	22738126	between_species_paralog	6	4	IPR005856	Cys_synthKM
LOC_Os01g74650	43230891	43237462	AT3G61440	22735663	22738126	between_species_paralog	6	4	IPR005856	Cys_synthKM
LOC_Os01g10320	5425518	5429614	AT4G00730	299359	304508	between_species_paralog	6	1	IPR002913	START_lipid_bd
LOC_Os01g55549	32005330	32008740	AT4G00730	299359	304508	between_species_paralog	9	3	IPR001356	Homeobox
LOC_Os01g57890	33470856	33477491	AT4G00730	299359	304508	between_species_paralog	7	3	IPR001356	Homeobox
LOC_Os01g43180	24642180	24643174	AT4G01060	460472	461085	ortholog_one2many	5	3	IPR001005	SANT_DNA-bd
LOC_Os01g10830	5772300	5773192	AT4G14430	8304600	8305705	ortholog_many2many	2	1	IPR001753	Crotonase_core
LOC_Os01g54620	31421902	31427644	AT4G15290	8721487	8726669	between_species_paralog	3	1	IPR005150	Cellulose_synth
LOC_Os01g08450	4159946	4164165	AT4G17530	9773548	9775607	between_species_paralog	11	9	IPR002041	Ran_GTPase
LOC_Os01g37800	21142348	21145394	AT4G17530	9773548	9775607	between_species_paralog	11	9	IPR002041	Ran_GTPase
LOC_Os01g10900	5813778	5818207	AT4G18640	10259678	10263764	ortholog_one2many	10	5	IPR002290	Ser_thr_pkinase
LOC_Os01g48390	27732365	27738800	AT4G18640	10259678	10263764	between_species_paralog	10	5	IPR002290	Ser_thr_pkinase
LOC_Os01g50616	29065612	29071151	AT4G34580	16515327	16519534	between_species_paralog	5	4	IPR001071	CRAL_bd_toc_tran
LOC_Os01g64630	37508842	37512326	AT5G09810	3052097	3054614	between_species_paralog	3	1	IPR004000	Actin-like
LOC_Os01g73310	42483029	42486407	AT5G09810	3052097	3054614	between_species_paralog	3	1	IPR004000	Actin-like
LOC_Os01g51630	29651535	29654580	AT5G20490	6926623	6937506	ortholog_one2many	9	1	IPR018444	Dil_domain
LOC_Os01g51634	29668935	29674313	AT5G20490	6926623	6937506	ortholog_one2many	10	3	IPR004009	Myosin_N
LOC_Os01g51630	29651535	29654580	AT5G43900	17656894	17667451	between_species_paralog	7	1	IPR018444	Dil_domain
LOC_Os01g51634	29668935	29674313	AT5G43900	17656894	17667451	between_species_paralog	8	3	IPR004009	Myosin_N
LOC_Os01g08780	4401620	4406292	AT5G65090	26004017	26006851	between_species_paralog	3	2	IPR005135	Endo/exonuclease/phosphatase
LOC_Os01g51890	29829077	29835193	AT5G65090	26004017	26006851	between_species_paralog	3	2	IPR005135	Endo/exonuclease/phosphatase
LOC_Os01g59880	34628316	34634162	AT5G65090	26004017	26006851	between_species_paralog	3	1	IPR005135	Endo/exonuclease/phosphatase
LOC_Os02g02170	655324	657245	AT1G08090	2524076	2526164	ortholog_many2many	3	2	IPR011701	MFS_1
LOC_Os02g02190	667194	669053	AT1G08090	2524076	2526164	ortholog_many2many	3	2	IPR011701	MFS_1
LOC_Os02g02170	655324	657245	AT1G08100	2527170	2529120	ortholog_many2many	3	2	IPR011701	MFS_1
LOC_Os02g02190	667194	669053	AT1G08100	2527170	2529120	ortholog_many2many	3	2	IPR011701	MFS_1
LOC_Os02g52230	31980085	31983554	AT1G12820	4368760	4371293	between_species_paralog	4	2	IPR001810	F-box
LOC_Os02g25820	15124488	15125594	AT1G13260	4542168	4543742	between_species_paralog	4	1	IPR003340	TF_B3
LOC_Os02g25830	15128131	15128949	AT1G13260	4542168	4543742	between_species_paralog	4	0
LOC_Os02g45850	27926962	27928820	AT1G13260	4542168	4543742	between_species_paralog	5	1	IPR003340	TF_B3
LOC_Os02g22090	13144842	13149935	AT1G13980	4788463	4794654	ortholog_many2many	3	1	IPR000904	Sec7
LOC_Os02g39230	23694091	23695761	AT1G15570	5362009	5365549	between_species_paralog	6	3	IPR004367	Cyclin_C
LOC_Os02g39240	23699789	23700991	AT1G15570	5362009	5365549	between_species_paralog	6	5	IPR004367	Cyclin_C
LOC_Os02g39260	23705021	23706577	AT1G15570	5362009	5365549	between_species_paralog	7	5	IPR004367	Cyclin_C
LOC_Os02g39420	23778892	23780064	AT1G15570	5362009	5365549	between_species_paralog	6	5	IPR004367	Cyclin_C
LOC_Os02g39430	23783066	23784268	AT1G15570	5362009	5365549	between_species_paralog	6	5	IPR004367	Cyclin_C
LOC_Os02g36710	22145563	22150173	AT1G18800	6481113	6483596	ortholog_many2many	2	1	IPR002164	NAP_family
LOC_Os02g04810	2207419	2214632	AT1G19220	6628068	6633087	between_species_paralog	4	2	IPR003340	TF_B3
LOC_Os02g02120	627342	630655	AT1G21210	7424106	7427041	ortholog_many2many	15	7	IPR002290	Ser_thr_pkinase
LOC_Os02g41480	24856334	24858930	AT1G21210	7424106	7427041	ortholog_many2many	13	4	IPR002290	Ser_thr_pkinase
LOC_Os02g41500	24865877	24868342	AT1G21210	7424106	7427041	ortholog_many2many	15	6	IPR002290	Ser_thr_pkinase
LOC_Os02g56380	34510753	34513605	AT1G21210	7424106	7427041	ortholog_many2many	13	4	IPR002290	Ser_thr_pkinase
LOC_Os02g56400	34525687	34528410	AT1G21210	7424106	7427041	ortholog_many2many	15	7	IPR002290	Ser_thr_pkinase
LOC_Os02g56630	34714997	34717490	AT1G21210	7424106	7427041	ortholog_many2many	13	6	IPR002290	Ser_thr_pkinase
LOC_Os02g47230	28820839	28827763	AT1G31880	11445490	11450189	ortholog_many2many	2	1	IPR013591	DiseaseR/Znf/csome_condsation
LOC_Os02g19790	11577055	11577989	AT1G55020	20525708	20530273	ortholog_many2many	6	1	IPR013819	LipOase_C
LOC_Os02g06950	3522907	3529541	AT1G56010	20946571	20949281	ortholog_many2many	2	1	IPR003441	NAM
LOC_Os02g41450	24810863	24813949	AT1G56010	20946571	20949281	between_species_paralog	2	1	IPR003441	NAM
LOC_Os02g56600	34667123	34670552	AT1G56010	20946571	20949281	between_species_paralog	2	1	IPR003441	NAM
LOC_Os02g36710	22145563	22150173	AT1G74560	28017584	28020049	ortholog_many2many	2	1	IPR002164	NAP_family
LOC_Os02g57660	35301523	35307766	AT1G77740	29220538	29224220	between_species_paralog	5	4	IPR016034	PInositol-4P-5-kinase_core_sub
LOC_Os02g10520	5529942	5536941	AT2G04160	1401268	1407745	ortholog_many2many	4	3	IPR000209	Peptidase_S8/S53
LOC_Os02g16940	9650579	9656893	AT2G04160	1401268	1407745	between_species_paralog	4	2	IPR000209	Peptidase_S8/S53
LOC_Os02g17000	9712536	9715957	AT2G04160	1401268	1407745	between_species_paralog	4	2	IPR000209	Peptidase_S8/S53
LOC_Os02g17060	9757893	9762117	AT2G04160	1401268	1407745	between_species_paralog	4	2	IPR000209	Peptidase_S8/S53
LOC_Os02g17080	9764689	9770195	AT2G04160	1401268	1407745	between_species_paralog	4	3	IPR000209	Peptidase_S8/S53
LOC_Os02g17090	9778408	9782063	AT2G04160	1401268	1407745	between_species_paralog	4	3	IPR000209	Peptidase_S8/S53
LOC_Os02g17150	9826265	9829110	AT2G04160	1401268	1407745	between_species_paralog	4	2	IPR000209	Peptidase_S8/S53
LOC_Os02g36924	22288788	22295939	AT2G14210	6018558	6023863	ortholog_one2many	3	2	IPR002100	TF_MADSbox
LOC_Os02g49840	30450797	30456890	AT2G14210	6018558	6023863	ortholog_one2many	3	2	IPR002100	TF_MADSbox
LOC_Os02g52340	32033033	32039261	AT2G14210	6018558	6023863	between_species_paralog	4	2	IPR002100	TF_MADSbox
LOC_Os02g57490	35221427	35222740	AT2G42430	17663444	17665295	ortholog_one2many	2	1	IPR004883	LOB
LOC_Os02g36880	22252964	22254812	AT3G15170	5109883	5111447	between_species_paralog	2	1	IPR003441	NAM
LOC_Os02g19790	11577055	11577989	AT3G22400	7926879	7931351	ortholog_many2many	6	1	IPR013819	LipOase_C
LOC_Os02g04520	2007232	2009965	AT3G22942	8134190	8136204	between_species_paralog	1	0
LOC_Os02g40710	24677764	24679336	AT3G24300	8805631	8807388	ortholog_many2many	3	1	IPR001905	Ammonium_transpt
LOC_Os02g40730	24685015	24687015	AT3G24300	8805631	8807388	ortholog_many2many	3	1	IPR001905	Ammonium_transpt
LOC_Os02g09480	4867671	4869377	AT3G50060	18557970	18559106	ortholog_many2many	6	3	IPR001005	SANT_DNA-bd
LOC_Os02g49250	30097917	30098762	AT3G50060	18557970	18559106	between_species_paralog	5	3	IPR001005	SANT_DNA-bd
LOC_Os02g57490	35221427	35222740	AT3G58190	21548484	21549558	between_species_paralog	2	1	IPR004883	LOB
LOC_Os02g52230	31980085	31983554	AT3G62980	23273116	23276375	between_species_paralog	3	2	IPR001810	F-box
LOC_Os02g04520	2007232	2009965	AT3G63420	23417272	23418698	between_species_paralog	1	0
LOC_Os02g44310	26799119	26799956	AT4G12550	7439115	7439805	ortholog_many2many	3	2	IPR016140	Bifunc_inhib/LTP/seed_store
LOC_Os02g44320	26808687	26809674	AT4G12550	7439115	7439805	between_species_paralog	3	2	IPR016140	Bifunc_inhib/LTP/seed_store
LOC_Os02g40710	24677764	24679336	AT4G13510	7858183	7859918	ortholog_many2many	3	1	IPR001905	Ammonium_transpt
LOC_Os02g40730	24685015	24687015	AT4G13510	7858183	7859918	ortholog_many2many	3	1	IPR001905	Ammonium_transpt
LOC_Os02g13520	7245015	7248672	AT4G14550	8347822	8350019	between_species_paralog	3	1	IPR003311	AUX_IAA
LOC_Os02g57250	35067502	35069932	AT4G14550	8347822	8350019	between_species_paralog	4	1	IPR003311	AUX_IAA
LOC_Os02g14059	7676811	7687506	AT4G18730	10302163	10303382	ortholog_many2many	3	1	IPR002132	Ribosomal_L5
LOC_Os02g26550	15578247	15584666	AT4G33495	16110712	16112597	between_species_paralog	2	1	IPR001578	Peptidase_C12
LOC_Os02g32540	19254290	19256333	AT4G33495	16110712	16112597	between_species_paralog	2	1	IPR001578	Peptidase_C12
LOC_Os02g43560	26274384	26278045	AT5G13080	4149740	4151150	between_species_paralog	4	1	IPR003657	WRKY_DNA_bd
LOC_Os02g32040	18917753	18918472	AT5G18560	6164587	6165991	between_species_paralog	4	2	IPR001471	TF_ERF_DNA-bd
LOC_Os02g38090	23018928	23019965	AT5G18560	6164587	6165991	between_species_paralog	3	2	IPR001471	TF_ERF_DNA-bd
LOC_Os02g04810	2207419	2214632	AT5G20730	7016445	7022113	between_species_paralog	5	2	IPR003340	TF_B3
LOC_Os02g13520	7245015	7248672	AT5G25890	9033415	9034834	between_species_paralog	3	1	IPR003311	AUX_IAA
LOC_Os02g57250	35067502	35069932	AT5G25890	9033415	9034834	between_species_paralog	4	1	IPR003311	AUX_IAA
LOC_Os02g12790	6705604	6707734	AT5G26930	9479466	9480200	between_species_paralog	4	1	IPR000679	Znf_GATA
LOC_Os02g37000	22341194	22342316	AT5G40770	16314850	16316719	ortholog_many2many	3	2	IPR000163	Prohibitin
LOC_Os02g13800	7463932	7465506	AT5G45710	18540850	18542863	between_species_paralog	2	1	IPR000232	HSF_DNA_bd
LOC_Os02g29340	17422157	17425503	AT5G45710	18540850	18542863	between_species_paralog	2	1	IPR000232	HSF_DNA_bd
LOC_Os02g32590	19303726	19307189	AT5G45710	18540850	18542863	between_species_paralog	2	1	IPR000232	HSF_DNA_bd
LOC_Os02g52230	31980085	31983554	AT1G12820	4368760	4371293	between_species_paralog	4	2	IPR001810	F-box
LOC_Os02g22020	13096082	13098232	AT1G13300	4556892	4558708	ortholog_one2many	5	3	IPR006447	SHAQKYF_myb_bd
LOC_Os02g07490	3868110	3872942	AT1G16300	5574310	5577622	ortholog_many2many	7	1	IPR006424	Glyceraldehyde-3-P_DH_1
LOC_Os02g07490	3868110	3872942	AT1G79530	29915902	29919234	ortholog_many2many	7	1	IPR006424	Glyceraldehyde-3-P_DH_1
LOC_Os02g17880	10359558	10361067	AT2G18800	8144912	8146265	between_species_paralog	7	5	IPR016455	XET
LOC_Os02g17900	10363977	10365534	AT2G18800	8144912	8146265	between_species_paralog	7	5	IPR016455	XET
LOC_Os02g08500	4573803	4578360	AT2G25180	10724301	10726961	ortholog_many2many	7	6	IPR017053	Response_reg_B-typ_pln
LOC_Os02g55320	33853956	33858973	AT2G25180	10724301	10726961	ortholog_many2many	7	6	IPR017053	Response_reg_B-typ_pln
LOC_Os02g08500	4573803	4578360	AT3G16857	5755821	5759443	between_species_paralog	7	6	IPR017053	Response_reg_B-typ_pln
LOC_Os02g55320	33853956	33858973	AT3G16857	5755821	5759443	between_species_paralog	7	6	IPR017053	Response_reg_B-typ_pln
LOC_Os02g08500	4573803	4578360	AT4G31920	15444117	15446959	ortholog_many2many	7	6	IPR017053	Response_reg_B-typ_pln
LOC_Os02g55320	33853956	33858973	AT4G31920	15444117	15446959	ortholog_many2many	7	6	IPR017053	Response_reg_B-typ_pln
LOC_Os02g15340	8582542	8584540	AT1G33280	12072741	12073839	between_species_paralog	2	1	IPR003441	NAM
LOC_Os02g42970	25853635	25855114	AT1G33280	12072741	12073839	between_species_paralog	2	1	IPR003441	NAM
LOC_Os02g15340	8582542	8584540	AT1G79580	29940850	29943602	ortholog_one2many	2	1	IPR003441	NAM
LOC_Os02g42970	25853635	25855114	AT1G79580	29940850	29943602	between_species_paralog	2	1	IPR003441	NAM
LOC_Os02g41800	25127573	25130242	AT2G28350	12114331	12116848	between_species_paralog	4	2	IPR003340	TF_B3
LOC_Os02g15340	8582542	8584540	AT4G10350	6415256	6416829	between_species_paralog	2	1	IPR003441	NAM
LOC_Os02g42970	25853635	25855114	AT4G10350	6415256	6416829	between_species_paralog	2	1	IPR003441	NAM
LOC_Os02g41800	25127573	25130242	AT4G30080	14703201	14706336	between_species_paralog	4	2	IPR003340	TF_B3
LOC_Os02g13520	7245015	7248672	AT1G04550	1240375	1242121	between_species_paralog	3	1	IPR003311	AUX_IAA
LOC_Os02g57250	35067502	35069932	AT1G04550	1240375	1242121	ortholog_one2many	4	1	IPR003311	AUX_IAA
LOC_Os02g27620	16354213	16358559	AT1G05630	1682318	1687363	ortholog_many2many	5	2	IPR005135	Endo/exonuclease/phosphatase
LOC_Os02g15220	8490391	8498389	AT1G06230	1906963	1910848	ortholog_many2many	2	1	IPR001487	Bromodomain
LOC_Os02g38980	23543305	23548513	AT1G06230	1906963	1910848	between_species_paralog	2	1	IPR001487	Bromodomain
LOC_Os02g02170	655324	657245	AT1G08090	2524076	2526164	ortholog_many2many	3	2	IPR011701	MFS_1
LOC_Os02g02190	667194	669053	AT1G08090	2524076	2526164	ortholog_many2many	3	2	IPR011701	MFS_1
LOC_Os02g02170	655324	657245	AT1G08090	2524076	2526164	ortholog_many2many	3	2	IPR011701	MFS_1
LOC_Os02g02190	667194	669053	AT1G08090	2524076	2526164	ortholog_many2many	3	2	IPR011701	MFS_1
LOC_Os02g02170	655324	657245	AT1G08100	2527170	2529120	ortholog_many2many	3	2	IPR011701	MFS_1
LOC_Os02g02190	667194	669053	AT1G08100	2527170	2529120	ortholog_many2many	3	2	IPR011701	MFS_1
LOC_Os02g52230	31980085	31983554	AT1G12820	4368760	4371293	between_species_paralog	4	2	IPR001810	F-box
LOC_Os02g52230	31980085	31983554	AT1G12820	4368760	4371293	between_species_paralog	4	2	IPR001810	F-box
LOC_Os02g25820	15124488	15125594	AT1G13260	4542168	4543742	between_species_paralog	4	1	IPR003340	TF_B3
LOC_Os02g25830	15128131	15128949	AT1G13260	4542168	4543742	between_species_paralog	4	0
LOC_Os02g45850	27926962	27928820	AT1G13260	4542168	4543742	between_species_paralog	5	1	IPR003340	TF_B3
LOC_Os02g22020	13096082	13098232	AT1G13300	4556892	4558708	ortholog_one2many	5	3	IPR006447	SHAQKYF_myb_bd
LOC_Os02g07490	3868110	3872942	AT1G16300	5574310	5577622	ortholog_many2many	7	1	IPR006424	Glyceraldehyde-3-P_DH_1
LOC_Os02g14730	8135360	8143468	AT1G17110	5845660	5850934	ortholog_one2one	7	2	IPR002893	Znf_MYND
LOC_Os02g04810	2207419	2214632	AT1G19220	6628068	6633087	between_species_paralog	4	2	IPR003340	TF_B3
LOC_Os02g04810	2207419	2214632	AT1G19850	6886879	6891374	between_species_paralog	5	2	IPR003340	TF_B3
LOC_Os02g02120	627342	630655	AT1G21210	7424106	7427041	ortholog_many2many	15	7	IPR002290	Ser_thr_pkinase
LOC_Os02g41480	24856334	24858930	AT1G21210	7424106	7427041	ortholog_many2many	13	4	IPR002290	Ser_thr_pkinase
LOC_Os02g41500	24865877	24868342	AT1G21210	7424106	7427041	ortholog_many2many	15	6	IPR002290	Ser_thr_pkinase
LOC_Os02g56380	34510753	34513605	AT1G21210	7424106	7427041	ortholog_many2many	13	4	IPR002290	Ser_thr_pkinase
LOC_Os02g56400	34525687	34528410	AT1G21210	7424106	7427041	ortholog_many2many	15	7	IPR002290	Ser_thr_pkinase
LOC_Os02g56630	34714997	34717490	AT1G21210	7424106	7427041	ortholog_many2many	13	6	IPR002290	Ser_thr_pkinase
LOC_Os02g50960	31153034	31156193	AT1G23080	8180577	8183570	between_species_paralog	3	2	IPR014024	Auxin_eff_sub
LOC_Os02g47230	28820839	28827763	AT1G31880	11445490	11450189	ortholog_many2many	2	1	IPR013591	DiseaseR/Znf/csome_condsation
LOC_Os02g47230	28820839	28827763	AT1G31880	11445490	11450189	ortholog_many2many	2	1	IPR013591	DiseaseR/Znf/csome_condsation
LOC_Os02g03320	1341178	1344290	AT1G35580	13122204	13125264	between_species_paralog	3	2	IPR006937	Invertase_neut
LOC_Os02g34560	20712019	20716052	AT1G35580	13122204	13125264	ortholog_many2many	3	2	IPR006937	Invertase_neut
LOC_Os02g07310	3748360	3755489	AT1G48410	17885633	17892596	possible_ortholog	5	4	IPR014811	DUF1785
LOC_Os02g45070	27324275	27335967	AT1G48410	17885633	17892596	ortholog_one2many	5	4	IPR014811	DUF1785
LOC_Os02g58490	35755264	35762538	AT1G48410	17885633	17892596	ortholog_one2many	5	4	IPR014811	DUF1785
LOC_Os02g40070	24255802	24260428	AT1G51190	18977284	18980618	between_species_paralog	3	2	IPR001471	TF_ERF_DNA-bd
LOC_Os02g51300	31404043	31408315	AT1G51190	18977284	18980618	between_species_paralog	3	2	IPR001471	TF_ERF_DNA-bd
LOC_Os02g17240	9885607	9888392	AT1G52240	19455766	19459586	ortholog_many2many	3	1	IPR005512	Rop_nucl_exchang_PRONE
LOC_Os02g47420	28947028	28953256	AT1G52240	19455766	19459586	between_species_paralog	3	1	IPR005512	Rop_nucl_exchang_PRONE
LOC_Os02g26890	15782604	15784124	AT1G53330	19896027	19897442	between_species_paralog	2	1	IPR002885	Pentatricopeptide_repeat
LOC_Os02g19790	11577055	11577989	AT1G55020	20525708	20530273	ortholog_many2many	6	1	IPR013819	LipOase_C
LOC_Os02g06950	3522907	3529541	AT1G56010	20946571	20949281	ortholog_many2many	2	1	IPR003441	NAM
LOC_Os02g41450	24810863	24813949	AT1G56010	20946571	20949281	between_species_paralog	2	1	IPR003441	NAM
LOC_Os02g56600	34667123	34670552	AT1G56010	20946571	20949281	between_species_paralog	2	1	IPR003441	NAM
LOC_Os02g32730	19431875	19436235	AT1G56560	21192499	21195112	between_species_paralog	4	2	IPR006937	Invertase_neut
LOC_Os02g43220	26040156	26040812	AT1G62830	23264490	23267202	between_species_paralog	7	1	IPR001613	Amineoxid_fl
LOC_Os02g51880	31767472	31770552	AT1G62830	23264490	23267202	ortholog_one2one	6	5	IPR000960	Flavin_mOase
LOC_Os02g50960	31153034	31156193	AT1G70940	26743054	26746395	between_species_paralog	3	2	IPR014024	Auxin_eff_sub
LOC_Os02g01355	199224	204616	AT1G71692	26952645	26955127	between_species_paralog	3	2	IPR002100	TF_MADSbox
LOC_Os02g01365	199224	207221	AT1G71692	26952645	26955127	between_species_paralog	3	2	IPR002100	TF_MADSbox
LOC_Os02g45770	27870110	27878210	AT1G71692	26952645	26955127	between_species_paralog	3	2	IPR002100	TF_MADSbox
LOC_Os02g50960	31153034	31156193	AT1G73590	27659673	27663178	ortholog_one2many	3	2	IPR014024	Auxin_eff_sub
LOC_Os02g51320	31418074	31419370	AT1G74500	27998175	27998821	between_species_paralog	3	2	IPR001092	HLH_basic
LOC_Os02g41800	25127573	25130242	AT1G77850	29272313	29275419	between_species_paralog	3	2	IPR003340	TF_B3
LOC_Os02g51860	31757146	31762913	AT1G78240	29432829	29436571	ortholog_one2one	2	1	IPR004159	DUF248_MeTrfase
LOC_Os02g07490	3868110	3872942	AT1G79530	29915902	29919234	ortholog_many2many	7	1	IPR006424	Glyceraldehyde-3-P_DH_1
LOC_Os02g50960	31153034	31156193	AT2G01420	180105	183328	between_species_paralog	3	2	IPR014024	Auxin_eff_sub
LOC_Os02g36924	22288788	22295939	AT2G14210	6018558	6023863	ortholog_one2many	3	2	IPR002100	TF_MADSbox
LOC_Os02g49840	30450797	30456890	AT2G14210	6018558	6023863	ortholog_one2many	3	2	IPR002100	TF_MADSbox
LOC_Os02g52340	32033033	32039261	AT2G14210	6018558	6023863	between_species_paralog	4	2	IPR002100	TF_MADSbox
LOC_Os02g12130	6311211	6313776	AT2G17780	7724885	7727404	ortholog_many2many	6	0
LOC_Os02g17880	10359558	10361067	AT2G18800	8144912	8146265	between_species_paralog	7	5	IPR016455	XET
LOC_Os02g17900	10363977	10365534	AT2G18800	8144912	8146265	between_species_paralog	7	5	IPR016455	XET
LOC_Os02g19924	11716851	11736542	AT2G20610	8877960	8880388	possible_ortholog	7	4	IPR001176	ACC_synthase
LOC_Os02g19970	11749116	11753782	AT2G20610	8877960	8880388	possible_ortholog	7	4	IPR001176	ACC_synthase
LOC_Os02g20360	11997090	12002629	AT2G20610	8877960	8880388	possible_ortholog	7	4	IPR001176	ACC_synthase
LOC_Os02g08500	4573803	4578360	AT2G25180	10724301	10726961	ortholog_many2many	7	6	IPR017053	Response_reg_B-typ_pln
LOC_Os02g55320	33853956	33858973	AT2G25180	10724301	10726961	ortholog_many2many	7	6	IPR017053	Response_reg_B-typ_pln
LOC_Os02g45170	27410657	27416092	AT2G27230	11650358	11654143	between_species_paralog	3	2	IPR001092	HLH_basic
LOC_Os02g49160	30058612	30060288	AT2G46990	19307855	19308990	ortholog_many2many	3	1	IPR003311	AUX_IAA
LOC_Os02g56120	34342713	34343987	AT2G46990	19307855	19308990	between_species_paralog	3	1	IPR003311	AUX_IAA
LOC_Os02g36880	22252964	22254812	AT3G15170	5109883	5111447	between_species_paralog	2	1	IPR003441	NAM
LOC_Os02g08500	4573803	4578360	AT3G16857	5755821	5759443	between_species_paralog	7	6	IPR017053	Response_reg_B-typ_pln
LOC_Os02g55320	33853956	33858973	AT3G16857	5755821	5759443	between_species_paralog	7	6	IPR017053	Response_reg_B-typ_pln
LOC_Os02g49160	30058612	30060288	AT3G17600	6020025	6021142	ortholog_many2many	3	1	IPR003311	AUX_IAA
LOC_Os02g56120	34342713	34343987	AT3G17600	6020025	6021142	between_species_paralog	3	1	IPR003311	AUX_IAA
LOC_Os02g40070	24255802	24260428	AT3G20840	7300675	7303693	between_species_paralog	3	2	IPR001471	TF_ERF_DNA-bd
LOC_Os02g51300	31404043	31408315	AT3G20840	7300675	7303693	between_species_paralog	3	2	IPR001471	TF_ERF_DNA-bd
LOC_Os02g19790	11577055	11577989	AT3G22400	7926879	7931351	ortholog_many2many	6	1	IPR013819	LipOase_C
LOC_Os02g04520	2007232	2009965	AT3G22942	8134190	8136204	between_species_paralog	1	0
LOC_Os02g09480	4867671	4869377	AT3G50060	18557970	18559106	ortholog_many2many	6	3	IPR001005	SANT_DNA-bd
LOC_Os02g49250	30097917	30098762	AT3G50060	18557970	18559106	between_species_paralog	5	3	IPR001005	SANT_DNA-bd
LOC_Os02g11760	6069031	6075807	AT3G53480	19825307	19831797	possible_ortholog	5	4	IPR003439	ABC_transporter-like
LOC_Os02g49160	30058612	30060288	AT3G62100	22995791	22996761	ortholog_many2many	3	1	IPR003311	AUX_IAA
LOC_Os02g56120	34342713	34343987	AT3G62100	22995791	22996761	between_species_paralog	3	1	IPR003311	AUX_IAA
LOC_Os02g04520	2007232	2009965	AT3G63420	23417272	23418698	between_species_paralog	1	0
LOC_Os02g45250	27481996	27489045	AT4G00730	299359	304508	ortholog_many2many	8	3	IPR001356	Homeobox
LOC_Os02g03320	1341178	1344290	AT4G09510	6021164	6023873	between_species_paralog	3	2	IPR006937	Invertase_neut
LOC_Os02g34560	20712019	20716052	AT4G09510	6021164	6023873	ortholog_many2many	3	2	IPR006937	Invertase_neut
LOC_Os02g05640	2757691	2758712	AT4G16780	9449114	9450743	between_species_paralog	8	4	IPR000047	HTH_lambrepressr
LOC_Os02g35770	21481726	21484025	AT4G16780	9449114	9450743	between_species_paralog	9	4	IPR000047	HTH_lambrepressr
LOC_Os02g14730	8135360	8143468	AT4G24560	12679210	12684939	between_species_paralog	7	2	IPR002893	Znf_MYND
LOC_Os02g54650	33470359	33478149	AT4G30340	14838291	14841067	ortholog_many2many	4	3	IPR001206	Diacylglycerol_kinase_cat
LOC_Os02g08500	4573803	4578360	AT4G31920	15444117	15446959	ortholog_many2many	7	6	IPR017053	Response_reg_B-typ_pln
LOC_Os02g55320	33853956	33858973	AT4G31920	15444117	15446959	ortholog_many2many	7	6	IPR017053	Response_reg_B-typ_pln
LOC_Os02g21009	12432283	12451808	AT5G01490	195541	198524	ortholog_many2many	6	3	IPR004713	CaH_exchang
LOC_Os02g31890	18833325	18836550	AT5G03150	745644	749007	between_species_paralog	3	2	IPR015880	Znf_C2H2-like
LOC_Os02g45054	27310151	27319794	AT5G03150	745644	749007	between_species_paralog	4	2	IPR015880	Znf_C2H2-like
LOC_Os02g12810	6726340	6733499	AT5G03730	974498	979849	between_species_paralog	10	4	IPR002290	Ser_thr_pkinase
LOC_Os02g32610	19318351	19326266	AT5G03730	974498	979849	ortholog_one2many	10	4	IPR002290	Ser_thr_pkinase
LOC_Os02g50970	31166067	31174313	AT5G03730	974498	979849	between_species_paralog	12	4	IPR002290	Ser_thr_pkinase
LOC_Os02g19180	11182943	11184386	AT5G04340	1216131	1217106	between_species_paralog	4	2	IPR015880	Znf_C2H2-like
LOC_Os02g57790	35383735	35384718	AT5G04340	1216131	1217106	between_species_paralog	5	2	IPR015880	Znf_C2H2-like
LOC_Os02g40070	24255802	24260428	AT5G10510	3315529	3320202	between_species_paralog	3	2	IPR001471	TF_ERF_DNA-bd
LOC_Os02g51300	31404043	31408315	AT5G10510	3315529	3320202	ortholog_many2many	3	2	IPR001471	TF_ERF_DNA-bd
LOC_Os02g43560	26274384	26278045	AT5G13080	4149740	4151150	between_species_paralog	4	1	IPR003657	WRKY_DNA_bd
LOC_Os02g30730	18305661	18311428	AT5G16780	5517490	5522258	ortholog_one2one	2	1	IPR005011	SART_1
LOC_Os02g04810	2207419	2214632	AT5G20730	7016445	7022113	between_species_paralog	5	2	IPR003340	TF_B3
LOC_Os02g05365	2577376	2578658	AT5G24630	8432384	8436170	ortholog_one2many	2	0
LOC_Os02g05370	2582087	2586195	AT5G24630	8432384	8436170	ortholog_one2many	2	0
LOC_Os02g05440	2614245	2619025	AT5G24630	8432384	8436170	ortholog_one2many	2	0
LOC_Os02g12790	6705604	6707734	AT5G26930	9479466	9480200	between_species_paralog	4	1	IPR000679	Znf_GATA
LOC_Os02g37000	22341194	22342316	AT5G40770	16314850	16316719	ortholog_many2many	3	2	IPR000163	Prohibitin
LOC_Os02g13800	7463932	7465506	AT5G45710	18540850	18542863	between_species_paralog	2	1	IPR000232	HSF_DNA_bd
LOC_Os02g29340	17422157	17425503	AT5G45710	18540850	18542863	between_species_paralog	2	1	IPR000232	HSF_DNA_bd
LOC_Os02g32590	19303726	19307189	AT5G45710	18540850	18542863	between_species_paralog	2	1	IPR000232	HSF_DNA_bd
LOC_Os02g29960	17799619	17803155	AT5G47990	19434827	19436689	between_species_paralog	7	3	IPR001128	Cyt_P450
LOC_Os02g45280	27501360	27505222	AT5G48000	19444138	19447850	ortholog_many2many	7	4	IPR002397	Cyt_P450_B
LOC_Os02g04690	2110921	2120419	AT5G48010	19456960	19461689	between_species_paralog	4	3	IPR018333	Squalene_cyclase
LOC_Os02g04710	2128229	2137102	AT5G48010	19456960	19461689	between_species_paralog	5	3	IPR018333	Squalene_cyclase
LOC_Os02g04730	2148473	2153358	AT5G48010	19456960	19461689	between_species_paralog	5	3	IPR018333	Squalene_cyclase
LOC_Os02g04750	2161769	2166648	AT5G48010	19456960	19461689	between_species_paralog	5	2	IPR008930	Terpenoid_cyclase/PrenylTrfase
LOC_Os02g04760	2174423	2178634	AT5G48010	19456960	19461689	between_species_paralog	4	1	IPR008930	Terpenoid_cyclase/PrenylTrfase
LOC_Os02g20540	12113830	12114971	AT5G55730	22558148	22560461	between_species_paralog	4	1	IPR000782	FAS1_domain
LOC_Os02g20560	12127908	12129258	AT5G55730	22558148	22560461	between_species_paralog	3	1	IPR000782	FAS1_domain
LOC_Os02g26320	15453153	15454310	AT5G55730	22558148	22560461	between_species_paralog	2	1	IPR000782	FAS1_domain
LOC_Os02g28130	16655024	16655625	AT5G55730	22558148	22560461	between_species_paralog	2	1	IPR000782	FAS1_domain
LOC_Os02g49420	30192724	30193979	AT5G55730	22558148	22560461	between_species_paralog	2	1	IPR000782	FAS1_domain
LOC_Os02g40070	24255802	24260428	AT5G57390	23253459	23256450	between_species_paralog	3	2	IPR001471	TF_ERF_DNA-bd
LOC_Os02g51300	31404043	31408315	AT5G57390	23253459	23256450	between_species_paralog	3	2	IPR001471	TF_ERF_DNA-bd
LOC_Os02g15350	8590286	8593924	AT5G60200	24240975	24242523	between_species_paralog	4	1	IPR003851	Znf_Dof
LOC_Os02g45200	27429434	27432818	AT5G60200	24240975	24242523	between_species_paralog	2	1	IPR003851	Znf_Dof
LOC_Os02g47810	29232195	29235893	AT5G60200	24240975	24242523	between_species_paralog	2	1	IPR003851	Znf_Dof
LOC_Os02g49440	30201095	30202437	AT5G60200	24240975	24242523	between_species_paralog	2	1	IPR003851	Znf_Dof
LOC_Os02g43330	26137440	26138862	AT5G66700	26634320	26635885	between_species_paralog	8	4	IPR000047	HTH_lambrepressr
LOC_Os02g49700	30375434	30377792	AT5G66700	26634320	26635885	between_species_paralog	8	4	IPR000047	HTH_lambrepressr
LOC_Os02g53740	32898712	32907903	AT1G04160	1086495	1096146	between_species_paralog	8	2	IPR000048	IQ_CaM_bd_region
LOC_Os02g57190	35022700	35034601	AT1G04160	1086495	1096146	ortholog_many2many	8	3	IPR000048	IQ_CaM_bd_region
LOC_Os02g51040	31214699	31216360	AT1G12560	4276519	4277899	between_species_paralog	8	5	IPR005132	RlpA
LOC_Os02g22090	13144842	13149935	AT1G13980	4788463	4794654	ortholog_many2many	3	1	IPR000904	Sec7
LOC_Os02g50060	30573939	30575000	AT1G24620	8723712	8724459	between_species_paralog	7	2	IPR002048	EF_hand_Ca_bd
LOC_Os02g50080	30579680	30580315	AT1G24620	8723712	8724459	between_species_paralog	7	3	IPR002048	EF_hand_Ca_bd
LOC_Os02g17240	9885607	9888392	AT1G52240	19455766	19459586	ortholog_many2many	3	1	IPR005512	Rop_nucl_exchang_PRONE
LOC_Os02g47420	28947028	28953256	AT1G52240	19455766	19459586	between_species_paralog	3	1	IPR005512	Rop_nucl_exchang_PRONE
LOC_Os02g48060	29415532	29417120	AT1G66470	24795214	24796988	ortholog_many2many	3	2	IPR001092	HLH_basic
LOC_Os02g50960	31153034	31156193	AT1G70940	26743054	26746395	between_species_paralog	3	2	IPR014024	Auxin_eff_sub
LOC_Os02g58070	35539636	35542483	AT2G17720	7697336	7699568	possible_ortholog	3	2	IPR006620	Pro_4_hyd_alph
LOC_Os02g42430	25517597	25518511	AT2G22475	9541401	9545010	between_species_paralog	2	1	IPR004182	GRAM
LOC_Os02g42440	25521732	25523187	AT2G22475	9541401	9545010	between_species_paralog	2	1	IPR004182	GRAM
LOC_Os02g35660	21430431	21434796	AT2G24260	10319334	10322222	between_species_paralog	3	2	IPR001092	HLH_basic
LOC_Os02g55250	33828040	33832179	AT2G24260	10319334	10322222	ortholog_many2many	3	2	IPR001092	HLH_basic
LOC_Os02g57660	35301523	35307766	AT2G26420	11239434	11242239	between_species_paralog	5	4	IPR016034	PInositol-4P-5-kinase_core_sub
LOC_Os02g14840	8244346	8248443	AT2G26650	11331850	11336607	between_species_paralog	9	5	IPR000595	cNMP_bd
LOC_Os02g44360	26835716	26838462	AT2G45160	18617862	18620150	ortholog_many2many	2	1	IPR005202	GRAS
LOC_Os02g44370	26846210	26849195	AT2G45160	18617862	18620150	ortholog_many2many	3	1	IPR005202	GRAS
LOC_Os02g17240	9885607	9888392	AT2G45890	18883473	18885566	between_species_paralog	2	1	IPR005512	Rop_nucl_exchang_PRONE
LOC_Os02g47420	28947028	28953256	AT2G45890	18883473	18885566	between_species_paralog	2	1	IPR005512	Rop_nucl_exchang_PRONE
LOC_Os02g46680	28481680	28492811	AT2G47000	19309868	19315241	between_species_paralog	6	3	IPR003439	ABC_transporter-like
LOC_Os02g48450	29661874	29663793	AT3G43960	15774055	15775657	between_species_paralog	4	2	IPR013201	Prot_inhib_I29
LOC_Os02g34884	20915568	20926938	AT3G51460	19092518	19097353	ortholog_many2many	2	1	IPR002013	Syja_N
LOC_Os02g44360	26835716	26838462	AT3G60630	22410365	22412608	ortholog_many2many	2	1	IPR005202	GRAS
LOC_Os02g44370	26846210	26849195	AT3G60630	22410365	22412608	ortholog_many2many	3	1	IPR005202	GRAS
LOC_Os02g12900	6810648	6814112	AT3G61440	22735663	22738126	between_species_paralog	7	3	IPR005856	Cys_synthKM
LOC_Os02g44360	26835716	26838462	AT4G00150	57199	59286	ortholog_many2many	2	1	IPR005202	GRAS
LOC_Os02g44370	26846210	26849195	AT4G00150	57199	59286	ortholog_many2many	3	1	IPR005202	GRAS
LOC_Os02g45250	27481996	27489045	AT4G00730	299359	304508	ortholog_many2many	8	3	IPR001356	Homeobox
LOC_Os02g43690	26359955	26364731	AT4G17530	9773548	9775607	between_species_paralog	11	9	IPR002041	Ran_GTPase
LOC_Os02g09450	4847697	4852501	AT4G26690	13456434	13460060	between_species_paralog	3	2	IPR017946	PLC-like_Pdiesterase_TIM-brl
LOC_Os02g37590	22681409	22686411	AT4G26690	13456434	13460060	ortholog_many2many	3	2	IPR017946	PLC-like_Pdiesterase_TIM-brl
LOC_Os02g35660	21430431	21434796	AT4G30980	15079243	15081657	between_species_paralog	3	2	IPR001092	HLH_basic
LOC_Os02g55250	33828040	33832179	AT4G30980	15079243	15081657	ortholog_many2many	3	2	IPR001092	HLH_basic
LOC_Os02g04020	1743145	1748216	AT4G34580	16515327	16519534	between_species_paralog	5	4	IPR001071	CRAL_bd_toc_tran
LOC_Os02g04030	1748459	1753303	AT4G34580	16515327	16519534	ortholog_many2many	5	4	IPR001071	CRAL_bd_toc_tran
LOC_Os02g24430	14155449	14165912	AT4G34580	16515327	16519534	ortholog_many2many	5	4	IPR001071	CRAL_bd_toc_tran
LOC_Os02g48990	29944792	29950956	AT4G34580	16515327	16519534	between_species_paralog	5	4	IPR001071	CRAL_bd_toc_tran
LOC_Os02g34080	20363499	20385770	AT5G20490	6926623	6937506	between_species_paralog	9	5	IPR004009	Myosin_N
LOC_Os02g34080	20363499	20385770	AT5G43900	17656894	17667451	possible_ortholog	7	5	IPR004009	Myosin_N
LOC_Os02g35660	21430431	21434796	AT5G58010	23483545	23484889	between_species_paralog	3	2	IPR001092	HLH_basic
LOC_Os02g55250	33828040	33832179	AT5G58010	23483545	23484889	ortholog_many2many	3	2	IPR001092	HLH_basic
LOC_Os02g41860	25156674	25160748	AT5G60660	24375457	24376989	ortholog_many2many	3	2	IPR012269	Aquaporin
LOC_Os02g51600	31595497	31598528	AT5G65090	26004017	26006851	ortholog_one2many	3	2	IPR005135	Endo/exonuclease/phosphatase
LOC_Os03g39850	22158753	22160001	AT1G10370	3397081	3398358	ortholog_many2many	4	3	IPR004045	Glutathione_S-Trfase_N
LOC_Os03g08850	4583344	4585850	AT1G12820	4368760	4371293	between_species_paralog	5	2	IPR001810	F-box
LOC_Os03g02900	1151916	1153874	AT1G13260	4542168	4543742	between_species_paralog	4	1	IPR003340	TF_B3
LOC_Os03g46325	26198957	26199947	AT1G13980	4788463	4794654	ortholog_many2many	3	0
LOC_Os03g46330	26200286	26206408	AT1G13980	4788463	4794654	ortholog_many2many	3	2	IPR000904	Sec7
LOC_Os03g49790	28338486	28339772	AT1G13980	4788463	4794654	between_species_paralog	3	0
LOC_Os03g11030	5672158	5675258	AT1G15570	5362009	5365549	between_species_paralog	7	5	IPR004367	Cyclin_C
LOC_Os03g11040	5676634	5679112	AT1G15570	5362009	5365549	between_species_paralog	6	5	IPR004367	Cyclin_C
LOC_Os03g41100	22843972	22845834	AT1G15570	5362009	5365549	between_species_paralog	6	5	IPR004367	Cyclin_C
LOC_Os03g44050	24757338	24761574	AT1G21210	7424106	7427041	ortholog_many2many	13	5	IPR002290	Ser_thr_pkinase
LOC_Os03g44140	24795883	24805379	AT1G21210	7424106	7427041	ortholog_many2many	15	6	IPR002290	Ser_thr_pkinase
LOC_Os03g50880	29060799	29064604	AT1G25220	8836835	8839549	ortholog_many2many	6	5	IPR011702	GATASE
LOC_Os03g63650	35946067	35948035	AT1G31880	11445490	11450189	ortholog_many2many	2	1	IPR013591	DiseaseR/Znf/csome_condsation
LOC_Os03g12820	6894176	6897426	AT1G32230	11612118	11616218	between_species_paralog	4	1	IPR012317	PARP_catalytic
LOC_Os03g63770	35994788	36000409	AT1G32230	11612118	11616218	ortholog_many2many	4	0
LOC_Os03g11060	5685615	5686605	AT1G47200	17298031	17298817	ortholog_one2many	3	0
LOC_Os03g49260	28042495	28046779	AT1G55020	20525708	20530273	ortholog_many2many	5	4	IPR013819	LipOase_C
LOC_Os03g49350	28084665	28087667	AT1G55020	20525708	20530273	ortholog_many2many	5	2	IPR013819	LipOase_C
LOC_Os03g49380	28099957	28106354	AT1G55020	20525708	20530273	ortholog_many2many	5	4	IPR013819	LipOase_C
LOC_Os03g52860	30308494	30312011	AT1G55020	20525708	20530273	ortholog_many2many	5	4	IPR013819	LipOase_C
LOC_Os03g01870	523006	524276	AT1G56010	20946571	20949281	between_species_paralog	2	1	IPR003441	NAM
LOC_Os03g14080	7645584	7649497	AT1G77690	29200941	29203340	between_species_paralog	2	1	IPR013057	AA_transpt_TM
LOC_Os03g15550	8557683	8561739	AT1G77740	29220538	29224220	ortholog_many2many	6	2	IPR016034	PInositol-4P-5-kinase_core_sub
LOC_Os03g24160	13710991	13715475	AT1G77740	29220538	29224220	between_species_paralog	6	4	IPR016034	PInositol-4P-5-kinase_core_sub
LOC_Os03g24170	13718533	13722028	AT1G77740	29220538	29224220	between_species_paralog	5	2	IPR016034	PInositol-4P-5-kinase_core_sub
LOC_Os03g49800	28351148	28355664	AT1G77740	29220538	29224220	ortholog_many2many	5	4	IPR016034	PInositol-4P-5-kinase_core_sub
LOC_Os03g06290	3150509	3164234	AT2G04160	1401268	1407745	between_species_paralog	4	3	IPR000209	Peptidase_S8/S53
LOC_Os03g08754	4518407	4524780	AT2G14210	6018558	6023863	between_species_paralog	3	2	IPR002100	TF_MADSbox
LOC_Os03g12820	6894176	6897426	AT2G35510	14916723	14920377	between_species_paralog	3	1	IPR012317	PARP_catalytic
LOC_Os03g63770	35994788	36000409	AT2G35510	14916723	14920377	ortholog_many2many	3	0
LOC_Os03g14080	7645584	7649497	AT2G38120	15972993	15977180	between_species_paralog	2	1	IPR013057	AA_transpt_TM
LOC_Os03g07830	3983896	3984852	AT2G40220	16796599	16797585	between_species_paralog	3	2	IPR001471	TF_ERF_DNA-bd
LOC_Os03g05500	2722031	2722932	AT2G42430	17663444	17665295	ortholog_one2many	2	1	IPR004883	LOB
LOC_Os03g05510	2725692	2726555	AT2G42430	17663444	17665295	between_species_paralog	2	1	IPR004883	LOB
LOC_Os03g14270	7766000	7767639	AT2G42430	17663444	17665295	between_species_paralog	5	1	IPR004883	LOB
LOC_Os03g09850	4900971	4902751	AT3G07390	2365301	2366496	between_species_paralog	5	2	IPR007613	DUF568_DOMON_lke
LOC_Os03g09880	4912124	4913147	AT3G07390	2365301	2366496	between_species_paralog	3	2	IPR007613	DUF568_DOMON_lke
LOC_Os03g09900	4922848	4925169	AT3G07390	2365301	2366496	between_species_paralog	5	2	IPR007613	DUF568_DOMON_lke
LOC_Os03g21030	11936154	11938191	AT3G15170	5109883	5111447	between_species_paralog	2	1	IPR003441	NAM
LOC_Os03g42630	23732754	23734738	AT3G15170	5109883	5111447	between_species_paralog	2	1	IPR003441	NAM
LOC_Os03g49260	28042495	28046779	AT3G22400	7926879	7931351	ortholog_many2many	5	4	IPR013819	LipOase_C
LOC_Os03g49350	28084665	28087667	AT3G22400	7926879	7931351	ortholog_many2many	5	2	IPR013819	LipOase_C
LOC_Os03g49380	28099957	28106354	AT3G22400	7926879	7931351	ortholog_many2many	5	4	IPR013819	LipOase_C
LOC_Os03g52860	30308494	30312011	AT3G22400	7926879	7931351	ortholog_many2many	5	4	IPR013819	LipOase_C
LOC_Os03g17180	9556395	9565462	AT3G28860	10870038	10877506	between_species_paralog	5	3	IPR003439	ABC_transporter-like
LOC_Os03g13310	7183391	7184119	AT3G50060	18557970	18559106	between_species_paralog	5	3	IPR001005	SANT_DNA-bd
LOC_Os03g19630	11038512	11039081	AT3G50060	18557970	18559106	between_species_paralog	5	3	IPR001005	SANT_DNA-bd
LOC_Os03g25304	14445825	14446358	AT3G50060	18557970	18559106	between_species_paralog	5	3	IPR001005	SANT_DNA-bd
LOC_Os03g25140	14358019	14369428	AT3G54010	20000861	20005183	ortholog_one2one	6	3	IPR001440	TPR-1
LOC_Os03g05500	2722031	2722932	AT3G58190	21548484	21549558	between_species_paralog	2	1	IPR004883	LOB
LOC_Os03g05510	2725692	2726555	AT3G58190	21548484	21549558	between_species_paralog	2	1	IPR004883	LOB
LOC_Os03g14270	7766000	7767639	AT3G58190	21548484	21549558	between_species_paralog	5	1	IPR004883	LOB
LOC_Os03g43670	24413962	24418152	AT3G59420	21959647	21963041	ortholog_one2one	11	6	IPR001368	TNFR_Cys_rich_reg
LOC_Os03g08850	4583344	4585850	AT3G62980	23273116	23276375	between_species_paralog	4	2	IPR001810	F-box
LOC_Os03g52470	30102948	30107881	AT4G07410	4201249	4205224	ortholog_one2many	8	4	IPR001680	WD40_repeat
LOC_Os03g01300	207330	210839	AT4G12550	7439115	7439805	ortholog_many2many	4	2	IPR016140	Bifunc_inhib/LTP/seed_store
LOC_Os03g01320	218977	220070	AT4G12550	7439115	7439805	ortholog_many2many	4	2	IPR016140	Bifunc_inhib/LTP/seed_store
LOC_Os03g50960	29103374	29104174	AT4G12550	7439115	7439805	ortholog_many2many	3	2	IPR016140	Bifunc_inhib/LTP/seed_store
LOC_Os03g43400	24196728	24200100	AT4G14550	8347822	8350019	ortholog_many2many	3	1	IPR003311	AUX_IAA
LOC_Os03g43410	24210633	24211939	AT4G14550	8347822	8350019	between_species_paralog	3	1	IPR003311	AUX_IAA
LOC_Os03g53150	30473549	30476220	AT4G14550	8347822	8350019	ortholog_many2many	4	1	IPR003311	AUX_IAA
LOC_Os03g58350	33238881	33240188	AT4G14550	8347822	8350019	between_species_paralog	3	1	IPR003311	AUX_IAA
LOC_Os03g18690	10461368	10465165	AT4G29040	14312303	14314600	ortholog_many2many	6	3	IPR003959	ATPase_AAA_core
LOC_Os03g08350	4259935	4261849	AT4G33495	16110712	16112597	between_species_paralog	2	1	IPR001578	Peptidase_C12
LOC_Os03g44430	24999671	25001565	AT4G33495	16110712	16112597	between_species_paralog	2	1	IPR001578	Peptidase_C12
LOC_Os03g57270	32655126	32656682	AT4G33495	16110712	16112597	between_species_paralog	2	1	IPR001578	Peptidase_C12
LOC_Os03g46650	26391617	26399638	AT4G34460	16477106	16479528	ortholog_one2one	10	6	IPR016346	Guanine_nucleotide-bd_bsu
LOC_Os03g27610	15835260	15837082	AT4G37070	17464785	17467109	between_species_paralog	3	2	IPR016035	Acyl_Trfase/lysoPlipase
LOC_Os03g15780	8701726	8706732	AT5G05730	1719557	1722910	ortholog_many2many	7	5	IPR019999	Anthranilate_synth_I_C
LOC_Os03g61120	34708266	34713945	AT5G05730	1719557	1722910	ortholog_many2many	6	5	IPR019999	Anthranilate_synth_I_C
LOC_Os03g45450	25649057	25650143	AT5G13080	4149740	4151150	between_species_paralog	2	1	IPR003657	WRKY_DNA_bd
LOC_Os03g55080	31316075	31319811	AT5G13080	4149740	4151150	between_species_paralog	3	1	IPR003657	WRKY_DNA_bd
LOC_Os03g43400	24196728	24200100	AT5G25890	9033415	9034834	between_species_paralog	3	1	IPR003311	AUX_IAA
LOC_Os03g43410	24210633	24211939	AT5G25890	9033415	9034834	between_species_paralog	3	1	IPR003311	AUX_IAA
LOC_Os03g53150	30473549	30476220	AT5G25890	9033415	9034834	between_species_paralog	4	1	IPR003311	AUX_IAA
LOC_Os03g58350	33238881	33240188	AT5G25890	9033415	9034834	between_species_paralog	3	1	IPR003311	AUX_IAA
LOC_Os03g11060	5685615	5686605	AT5G43070	17289100	17289776	ortholog_one2many	3	0
LOC_Os03g06630	3341250	3343544	AT5G45710	18540850	18542863	between_species_paralog	2	1	IPR000232	HSF_DNA_bd
LOC_Os03g12370	6536569	6540400	AT5G45710	18540850	18542863	between_species_paralog	2	1	IPR000232	HSF_DNA_bd
LOC_Os03g58160	33098698	33101961	AT5G45710	18540850	18542863	between_species_paralog	2	1	IPR000232	HSF_DNA_bd
LOC_Os03g63750	35981880	35985504	AT5G45710	18540850	18542863	between_species_paralog	3	1	IPR000232	HSF_DNA_bd
LOC_Os03g16780	9295734	9298938	AT5G57740	23394585	23397650	between_species_paralog	5	2	IPR001841	Znf_RING
LOC_Os03g08850	4583344	4585850	AT1G12820	4368760	4371293	between_species_paralog	5	2	IPR001810	F-box
LOC_Os03g55590	31636214	31639038	AT1G13300	4556892	4558708	between_species_paralog	6	3	IPR006447	SHAQKYF_myb_bd
LOC_Os03g12350	6511744	6517792	AT2G25180	10724301	10726961	between_species_paralog	7	6	IPR017053	Response_reg_B-typ_pln
LOC_Os03g17980	10005323	10010960	AT3G01090	31181	34597	ortholog_many2many	12	7	IPR000449	UBA/transl_elong_EF1B_N
LOC_Os03g11890	6226228	6231509	AT3G07780	2484469	2487024	between_species_paralog	3	2	IPR001965	Znf_PHD
LOC_Os03g13590	7346519	7350722	AT3G07780	2484469	2487024	between_species_paralog	4	2	IPR001965	Znf_PHD
LOC_Os03g12350	6511744	6517792	AT3G16857	5755821	5759443	between_species_paralog	7	6	IPR017053	Response_reg_B-typ_pln
LOC_Os03g12350	6511744	6517792	AT4G31920	15444117	15446959	between_species_paralog	7	6	IPR017053	Response_reg_B-typ_pln
LOC_Os03g11890	6226228	6231509	AT5G48160	19527833	19530316	between_species_paralog	3	2	IPR001965	Znf_PHD
LOC_Os03g13590	7346519	7350722	AT5G48160	19527833	19530316	between_species_paralog	4	2	IPR001965	Znf_PHD
LOC_Os03g04070	1861348	1863241	AT1G26870	9312856	9314983	between_species_paralog	2	1	IPR003441	NAM
LOC_Os03g56580	32227186	32229477	AT1G26870	9312856	9314983	between_species_paralog	2	1	IPR003441	NAM
LOC_Os03g03540	1527965	1530620	AT1G33280	12072741	12073839	between_species_paralog	2	1	IPR003441	NAM
LOC_Os03g14080	7645584	7649497	AT1G77690	29200941	29203340	between_species_paralog	2	1	IPR013057	AA_transpt_TM
LOC_Os03g03540	1527965	1530620	AT1G79580	29940850	29943602	between_species_paralog	2	1	IPR003441	NAM
LOC_Os03g14080	7645584	7649497	AT2G21050	9034090	9036636	ortholog_one2many	2	1	IPR013057	AA_transpt_TM
LOC_Os03g14080	7645584	7649497	AT2G38120	15972993	15977180	between_species_paralog	2	1	IPR013057	AA_transpt_TM
LOC_Os03g43670	24413962	24418152	AT3G59420	21959647	21963041	ortholog_one2one	11	6	IPR001368	TNFR_Cys_rich_reg
LOC_Os03g03540	1527965	1530620	AT4G10350	6415256	6416829	between_species_paralog	2	1	IPR003441	NAM
LOC_Os03g18690	10461368	10465165	AT4G29040	14312303	14314600	ortholog_many2many	6	3	IPR003959	ATPase_AAA_core
LOC_Os03g14080	7645584	7649497	AT5G01240	97894	101835	between_species_paralog	2	1	IPR013057	AA_transpt_TM
LOC_Os03g43400	24196728	24200100	AT1G04550	1240375	1242121	between_species_paralog	3	1	IPR003311	AUX_IAA
LOC_Os03g43410	24210633	24211939	AT1G04550	1240375	1242121	between_species_paralog	3	1	IPR003311	AUX_IAA
LOC_Os03g53150	30473549	30476220	AT1G04550	1240375	1242121	between_species_paralog	4	1	IPR003311	AUX_IAA
LOC_Os03g58350	33238881	33240188	AT1G04550	1240375	1242121	between_species_paralog	3	1	IPR003311	AUX_IAA
LOC_Os03g52090	29882993	29903956	AT1G10130	3310930	3322213	ortholog_one2one	9	5	IPR008250	ATPase_P-typ_ATPase-assoc-reg
LOC_Os03g39850	22158753	22160001	AT1G10370	3397081	3398358	ortholog_many2many	4	3	IPR004045	Glutathione_S-Trfase_N
LOC_Os03g08850	4583344	4585850	AT1G12820	4368760	4371293	between_species_paralog	5	2	IPR001810	F-box
LOC_Os03g08850	4583344	4585850	AT1G12820	4368760	4371293	between_species_paralog	5	2	IPR001810	F-box
LOC_Os03g02900	1151916	1153874	AT1G13260	4542168	4543742	between_species_paralog	4	1	IPR003340	TF_B3
LOC_Os03g55590	31636214	31639038	AT1G13300	4556892	4558708	between_species_paralog	6	3	IPR006447	SHAQKYF_myb_bd
LOC_Os03g44050	24757338	24761574	AT1G21210	7424106	7427041	ortholog_many2many	13	5	IPR002290	Ser_thr_pkinase
LOC_Os03g44140	24795883	24805379	AT1G21210	7424106	7427041	ortholog_many2many	15	6	IPR002290	Ser_thr_pkinase
LOC_Os03g63650	35946067	35948035	AT1G31880	11445490	11450189	ortholog_many2many	2	1	IPR013591	DiseaseR/Znf/csome_condsation
LOC_Os03g63650	35946067	35948035	AT1G31880	11445490	11450189	ortholog_many2many	2	1	IPR013591	DiseaseR/Znf/csome_condsation
LOC_Os03g11060	5685615	5686605	AT1G47200	17298031	17298817	ortholog_one2many	3	0
LOC_Os03g14790	8038454	8045693	AT1G48410	17885633	17892596	between_species_paralog	5	1	IPR003165	Piwi
LOC_Os03g33650	19242680	19247284	AT1G48410	17885633	17892596	between_species_paralog	5	4	IPR014811	DUF1785
LOC_Os03g57560	32806850	32815850	AT1G48410	17885633	17892596	between_species_paralog	5	4	IPR014811	DUF1785
LOC_Os03g58600	33364211	33373173	AT1G48410	17885633	17892596	between_species_paralog	5	4	IPR014811	DUF1785
LOC_Os03g07940	4055775	4060463	AT1G51190	18977284	18980618	between_species_paralog	3	2	IPR001471	TF_ERF_DNA-bd
LOC_Os03g12950	6991876	6996181	AT1G51190	18977284	18980618	between_species_paralog	4	2	IPR001471	TF_ERF_DNA-bd
LOC_Os03g19900	11182934	11188103	AT1G51190	18977284	18980618	between_species_paralog	3	2	IPR001471	TF_ERF_DNA-bd
LOC_Os03g37710	20907839	20909545	AT1G51190	18977284	18980618	between_species_paralog	3	1	IPR001471	TF_ERF_DNA-bd
LOC_Os03g56050	31914810	31918390	AT1G51190	18977284	18980618	between_species_paralog	3	2	IPR001471	TF_ERF_DNA-bd
LOC_Os03g14840	8086099	8087890	AT1G53700	20048586	20050115	ortholog_one2many	8	4	IPR002290	Ser_thr_pkinase
LOC_Os03g44020	24742151	24743813	AT1G53700	20048586	20050115	between_species_paralog	8	4	IPR002290	Ser_thr_pkinase
LOC_Os03g49260	28042495	28046779	AT1G55020	20525708	20530273	ortholog_many2many	5	4	IPR013819	LipOase_C
LOC_Os03g49350	28084665	28087667	AT1G55020	20525708	20530273	ortholog_many2many	5	2	IPR013819	LipOase_C
LOC_Os03g49380	28099957	28106354	AT1G55020	20525708	20530273	ortholog_many2many	5	4	IPR013819	LipOase_C
LOC_Os03g52860	30308494	30312011	AT1G55020	20525708	20530273	ortholog_many2many	5	4	IPR013819	LipOase_C
LOC_Os03g01870	523006	524276	AT1G56010	20946571	20949281	between_species_paralog	2	1	IPR003441	NAM
LOC_Os03g20020	11282058	11286614	AT1G56560	21192499	21195112	ortholog_many2many	3	2	IPR006937	Invertase_neut
LOC_Os03g03070	1268854	1270781	AT1G71692	26952645	26955127	between_species_paralog	4	1	IPR002487	TF_Kbox
LOC_Os03g11614	6051750	6060369	AT1G71692	26952645	26955127	between_species_paralog	3	2	IPR002100	TF_MADSbox
LOC_Os03g54160	31024033	31034456	AT1G71692	26952645	26955127	between_species_paralog	3	2	IPR002100	TF_MADSbox
LOC_Os03g54170	31041238	31047906	AT1G71692	26952645	26955127	between_species_paralog	3	2	IPR002100	TF_MADSbox
LOC_Os03g07510	3813367	3822212	AT1G74500	27998175	27998821	ortholog_many2many	3	1	IPR011598	HLH_DNA_bd
LOC_Os03g07540	3844709	3845273	AT1G74500	27998175	27998821	between_species_paralog	3	2	IPR001092	HLH_basic
LOC_Os03g08754	4518407	4524780	AT2G14210	6018558	6023863	between_species_paralog	3	2	IPR002100	TF_MADSbox
LOC_Os03g06120	3067965	3073187	AT2G17780	7724885	7727404	ortholog_many2many	2	1	IPR006461	DUF_Cys-rich
LOC_Os03g16260	8962903	8965744	AT2G18470	8005285	8008052	between_species_paralog	9	4	IPR002290	Ser_thr_pkinase
LOC_Os03g37120	20567824	20571137	AT2G18470	8005285	8008052	between_species_paralog	14	4	IPR002290	Ser_thr_pkinase
LOC_Os03g38710	21482358	21485520	AT2G18470	8005285	8008052	between_species_paralog	9	4	IPR002290	Ser_thr_pkinase
LOC_Os03g56470	32175511	32178172	AT2G18470	8005285	8008052	ortholog_many2many	10	4	IPR002290	Ser_thr_pkinase
LOC_Os03g12350	6511744	6517792	AT2G25180	10724301	10726961	between_species_paralog	7	6	IPR017053	Response_reg_B-typ_pln
LOC_Os03g03820	1715433	1718778	AT2G37250	15641906	15643786	ortholog_one2one	4	2	IPR006259	Adenyl_kin_sub
LOC_Os03g16090	8869122	8874339	AT2G39830	16619762	16623791	ortholog_one2one	3	1	IPR001781	Znf_LIM
LOC_Os03g07830	3983896	3984852	AT2G40220	16796599	16797585	between_species_paralog	3	2	IPR001471	TF_ERF_DNA-bd
LOC_Os03g17700	9846636	9849409	AT2G43790	18138307	18140988	between_species_paralog	13	7	IPR008351	JNK_MAPK
LOC_Os03g17980	10005323	10010960	AT3G01090	31181	34597	ortholog_many2many	12	7	IPR000449	UBA/transl_elong_EF1B_N
LOC_Os03g11890	6226228	6231509	AT3G07780	2484469	2487024	between_species_paralog	3	2	IPR001965	Znf_PHD
LOC_Os03g13590	7346519	7350722	AT3G07780	2484469	2487024	between_species_paralog	4	2	IPR001965	Znf_PHD
LOC_Os03g14840	8086099	8087890	AT3G14370	4797845	4799504	ortholog_one2many	8	4	IPR002290	Ser_thr_pkinase
LOC_Os03g44020	24742151	24743813	AT3G14370	4797845	4799504	between_species_paralog	8	4	IPR002290	Ser_thr_pkinase
LOC_Os03g21030	11936154	11938191	AT3G15170	5109883	5111447	between_species_paralog	2	1	IPR003441	NAM
LOC_Os03g42630	23732754	23734738	AT3G15170	5109883	5111447	between_species_paralog	2	1	IPR003441	NAM
LOC_Os03g12350	6511744	6517792	AT3G16857	5755821	5759443	between_species_paralog	7	6	IPR017053	Response_reg_B-typ_pln
LOC_Os03g15650	8628699	8634103	AT3G19770	6866806	6869479	ortholog_one2many	3	2	IPR013995	VPS9_sub
LOC_Os03g62580	35417338	35421022	AT3G19770	6866806	6869479	between_species_paralog	3	2	IPR013995	VPS9_sub
LOC_Os03g07940	4055775	4060463	AT3G20840	7300675	7303693	between_species_paralog	3	2	IPR001471	TF_ERF_DNA-bd
LOC_Os03g12950	6991876	6996181	AT3G20840	7300675	7303693	between_species_paralog	4	2	IPR001471	TF_ERF_DNA-bd
LOC_Os03g19900	11182934	11188103	AT3G20840	7300675	7303693	between_species_paralog	3	2	IPR001471	TF_ERF_DNA-bd
LOC_Os03g37710	20907839	20909545	AT3G20840	7300675	7303693	between_species_paralog	3	1	IPR001471	TF_ERF_DNA-bd
LOC_Os03g56050	31914810	31918390	AT3G20840	7300675	7303693	between_species_paralog	3	2	IPR001471	TF_ERF_DNA-bd
LOC_Os03g49260	28042495	28046779	AT3G22400	7926879	7931351	ortholog_many2many	5	4	IPR013819	LipOase_C
LOC_Os03g49350	28084665	28087667	AT3G22400	7926879	7931351	ortholog_many2many	5	2	IPR013819	LipOase_C
LOC_Os03g49380	28099957	28106354	AT3G22400	7926879	7931351	ortholog_many2many	5	4	IPR013819	LipOase_C
LOC_Os03g52860	30308494	30312011	AT3G22400	7926879	7931351	ortholog_many2many	5	4	IPR013819	LipOase_C
LOC_Os03g15440	8457069	8460020	AT3G25710	9369519	9371394	ortholog_many2many	3	2	IPR001092	HLH_basic
LOC_Os03g59670	33966535	33968447	AT3G25710	9369519	9371394	between_species_paralog	3	2	IPR001092	HLH_basic
LOC_Os03g17180	9556395	9565462	AT3G28860	10870038	10877506	between_species_paralog	5	3	IPR003439	ABC_transporter-like
LOC_Os03g13310	7183391	7184119	AT3G50060	18557970	18559106	between_species_paralog	5	3	IPR001005	SANT_DNA-bd
LOC_Os03g19630	11038512	11039081	AT3G50060	18557970	18559106	between_species_paralog	5	3	IPR001005	SANT_DNA-bd
LOC_Os03g25304	14445825	14446358	AT3G50060	18557970	18559106	between_species_paralog	5	3	IPR001005	SANT_DNA-bd
LOC_Os03g18360	10285728	10289920	AT3G51770	19199781	19204464	ortholog_one2one	5	4	IPR001440	TPR-1
LOC_Os03g25140	14358019	14369428	AT3G54010	20000861	20005183	ortholog_one2one	6	3	IPR001440	TPR-1
LOC_Os03g57660	32851930	32859478	AT3G54720	20254725	20257848	ortholog_one2one	4	3	IPR007365	Transferrin_rcpt-like_dimerise
LOC_Os03g01890	548821	556907	AT4G00730	299359	304508	between_species_paralog	7	3	IPR001356	Homeobox
LOC_Os03g43930	24649879	24655729	AT4G00730	299359	304508	between_species_paralog	7	3	IPR001356	Homeobox
LOC_Os03g58910	33523299	33537444	AT4G13750	7975191	7987620	ortholog_one2one	2	1	IPR003594	ATP_bd_ATPase
LOC_Os03g21990	12598185	12604518	AT4G15900	9023728	9027666	ortholog_one2many	8	4	IPR001680	WD40_repeat
LOC_Os03g12860	6930707	6932326	AT4G16780	9449114	9450743	between_species_paralog	10	4	IPR000047	HTH_lambrepressr
LOC_Os03g60120	34185287	34186520	AT4G23750	12376194	12378024	ortholog_many2many	3	2	IPR001471	TF_ERF_DNA-bd
LOC_Os03g18690	10461368	10465165	AT4G29040	14312303	14314600	ortholog_many2many	6	3	IPR003959	ATPase_AAA_core
LOC_Os03g37070	20548989	20549423	AT4G31500	15273471	15275310	between_species_paralog	4	1	IPR001128	Cyt_P450
LOC_Os03g37080	20550153	20556523	AT4G31500	15273471	15275310	between_species_paralog	6	3	IPR001128	Cyt_P450
LOC_Os03g63310	35770778	35774205	AT4G31500	15273471	15275310	between_species_paralog	9	3	IPR001128	Cyt_P450
LOC_Os03g12350	6511744	6517792	AT4G31920	15444117	15446959	between_species_paralog	7	6	IPR017053	Response_reg_B-typ_pln
LOC_Os03g46650	26391617	26399638	AT4G34460	16477106	16479528	ortholog_one2one	10	6	IPR016346	Guanine_nucleotide-bd_bsu
LOC_Os03g10140	5133270	5136508	AT5G03150	745644	749007	between_species_paralog	6	2	IPR015880	Znf_C2H2-like
LOC_Os03g06410	3200308	3207295	AT5G03730	974498	979849	between_species_paralog	10	4	IPR002290	Ser_thr_pkinase
LOC_Os03g17150	9523855	9524786	AT5G04340	1216131	1217106	between_species_paralog	3	2	IPR015880	Znf_C2H2-like
LOC_Os03g32220	18428893	18430011	AT5G04340	1216131	1217106	ortholog_many2many	3	2	IPR015880	Znf_C2H2-like
LOC_Os03g32230	18434771	18435872	AT5G04340	1216131	1217106	ortholog_many2many	3	2	IPR015880	Znf_C2H2-like
LOC_Os03g41390	23034716	23035925	AT5G04340	1216131	1217106	ortholog_many2many	3	2	IPR015880	Znf_C2H2-like
LOC_Os03g55540	31597829	31599113	AT5G04340	1216131	1217106	between_species_paralog	3	2	IPR015880	Znf_C2H2-like
LOC_Os03g60540	34403732	34404292	AT5G04340	1216131	1217106	between_species_paralog	3	2	IPR015880	Znf_C2H2-like
LOC_Os03g60560	34417050	34417974	AT5G04340	1216131	1217106	between_species_paralog	3	2	IPR015880	Znf_C2H2-like
LOC_Os03g60570	34420569	34421483	AT5G04340	1216131	1217106	between_species_paralog	3	2	IPR015880	Znf_C2H2-like
LOC_Os03g02030	639595	644673	AT5G05980	1799490	1804492	ortholog_many2many	5	3	IPR004101	Mur_ligase_C
LOC_Os03g50885	29067047	29068922	AT5G09810	3052097	3054614	between_species_paralog	3	1	IPR004000	Actin-like
LOC_Os03g61970	35118388	35122232	AT5G09810	3052097	3054614	ortholog_one2many	3	1	IPR004000	Actin-like
LOC_Os03g07940	4055775	4060463	AT5G10510	3315529	3320202	between_species_paralog	3	2	IPR001471	TF_ERF_DNA-bd
LOC_Os03g12950	6991876	6996181	AT5G10510	3315529	3320202	between_species_paralog	4	2	IPR001471	TF_ERF_DNA-bd
LOC_Os03g19900	11182934	11188103	AT5G10510	3315529	3320202	ortholog_many2many	3	2	IPR001471	TF_ERF_DNA-bd
LOC_Os03g37710	20907839	20909545	AT5G10510	3315529	3320202	between_species_paralog	3	1	IPR001471	TF_ERF_DNA-bd
LOC_Os03g56050	31914810	31918390	AT5G10510	3315529	3320202	between_species_paralog	3	2	IPR001471	TF_ERF_DNA-bd
LOC_Os03g45450	25649057	25650143	AT5G13080	4149740	4151150	between_species_paralog	2	1	IPR003657	WRKY_DNA_bd
LOC_Os03g55080	31316075	31319811	AT5G13080	4149740	4151150	between_species_paralog	3	1	IPR003657	WRKY_DNA_bd
LOC_Os03g11060	5685615	5686605	AT5G43070	17289100	17289776	ortholog_one2many	3	0
LOC_Os03g06630	3341250	3343544	AT5G45710	18540850	18542863	between_species_paralog	2	1	IPR000232	HSF_DNA_bd
LOC_Os03g12370	6536569	6540400	AT5G45710	18540850	18542863	between_species_paralog	2	1	IPR000232	HSF_DNA_bd
LOC_Os03g58160	33098698	33101961	AT5G45710	18540850	18542863	between_species_paralog	2	1	IPR000232	HSF_DNA_bd
LOC_Os03g63750	35981880	35985504	AT5G45710	18540850	18542863	between_species_paralog	3	1	IPR000232	HSF_DNA_bd
LOC_Os03g02180	725211	727002	AT5G47990	19434827	19436689	between_species_paralog	6	3	IPR001128	Cyt_P450
LOC_Os03g25150	14379987	14386500	AT5G47990	19434827	19436689	between_species_paralog	6	3	IPR001128	Cyt_P450
LOC_Os03g44740	25217773	25219607	AT5G47990	19434827	19436689	between_species_paralog	6	3	IPR001128	Cyt_P450
LOC_Os03g12660	6736549	6743506	AT5G48000	19444138	19447850	between_species_paralog	6	4	IPR002397	Cyt_P450_B
LOC_Os03g40540	22536830	22541009	AT5G48000	19444138	19447850	between_species_paralog	7	4	IPR002397	Cyt_P450_B
LOC_Os03g45619	25744019	25758812	AT5G48000	19444138	19447850	ortholog_many2many	7	3	IPR001128	Cyt_P450
LOC_Os03g11890	6226228	6231509	AT5G48160	19527833	19530316	between_species_paralog	3	2	IPR001965	Znf_PHD
LOC_Os03g13590	7346519	7350722	AT5G48160	19527833	19530316	between_species_paralog	4	2	IPR001965	Znf_PHD
LOC_Os03g03600	1578312	1579906	AT5G55730	22558148	22560461	between_species_paralog	2	1	IPR000782	FAS1_domain
LOC_Os03g07940	4055775	4060463	AT5G57390	23253459	23256450	between_species_paralog	3	2	IPR001471	TF_ERF_DNA-bd
LOC_Os03g12950	6991876	6996181	AT5G57390	23253459	23256450	between_species_paralog	4	2	IPR001471	TF_ERF_DNA-bd
LOC_Os03g19900	11182934	11188103	AT5G57390	23253459	23256450	between_species_paralog	3	2	IPR001471	TF_ERF_DNA-bd
LOC_Os03g37710	20907839	20909545	AT5G57390	23253459	23256450	between_species_paralog	3	1	IPR001471	TF_ERF_DNA-bd
LOC_Os03g56050	31914810	31918390	AT5G57390	23253459	23256450	between_species_paralog	3	2	IPR001471	TF_ERF_DNA-bd
LOC_Os03g25470	14550886	14551437	AT5G59030	23833728	23834511	ortholog_many2many	3	1	IPR007274	Cop_transporter
LOC_Os03g16850	9358402	9359871	AT5G60200	24240975	24242523	between_species_paralog	2	1	IPR003851	Znf_Dof
LOC_Os03g38870	21598187	21599302	AT5G60200	24240975	24242523	between_species_paralog	5	1	IPR003851	Znf_Dof
LOC_Os03g42200	23470452	23474001	AT5G60200	24240975	24242523	between_species_paralog	2	1	IPR003851	Znf_Dof
LOC_Os03g55610	31655152	31656838	AT5G60200	24240975	24242523	between_species_paralog	2	1	IPR003851	Znf_Dof
LOC_Os03g60630	34448405	34449829	AT5G60200	24240975	24242523	between_species_paralog	5	1	IPR003851	Znf_Dof
LOC_Os03g31180	17753599	17759915	AT5G63770	25518641	25523621	between_species_paralog	4	3	IPR001206	Diacylglycerol_kinase_cat
LOC_Os03g07450	3783279	3785929	AT5G66700	26634320	26635885	between_species_paralog	8	4	IPR000047	HTH_lambrepressr
LOC_Os03g08960	4651929	4653826	AT5G66700	26634320	26635885	between_species_paralog	8	4	IPR000047	HTH_lambrepressr
LOC_Os03g10210	5179657	5181187	AT5G66700	26634320	26635885	ortholog_many2many	6	4	IPR000047	HTH_lambrepressr
LOC_Os03g53660	30757473	30766834	AT1G04160	1086495	1096146	between_species_paralog	8	4	IPR000048	IQ_CaM_bd_region
LOC_Os03g64290	36312800	36328816	AT1G04160	1086495	1096146	ortholog_many2many	7	4	IPR004009	Myosin_N
LOC_Os03g21820	12467980	12469320	AT1G12560	4276519	4277899	between_species_paralog	8	5	IPR005132	RlpA
LOC_Os03g25990	14893361	14895031	AT1G12560	4276519	4277899	between_species_paralog	8	5	IPR005132	RlpA
LOC_Os03g60720	34501132	34504149	AT1G12560	4276519	4277899	between_species_paralog	8	5	IPR005132	RlpA
LOC_Os03g46325	26198957	26199947	AT1G13980	4788463	4794654	ortholog_many2many	3	0
LOC_Os03g46330	26200286	26206408	AT1G13980	4788463	4794654	ortholog_many2many	3	2	IPR000904	Sec7
LOC_Os03g49790	28338486	28339772	AT1G13980	4788463	4794654	between_species_paralog	3	0
LOC_Os03g55960	31851377	31852331	AT1G24620	8723712	8724459	between_species_paralog	6	2	IPR002048	EF_hand_Ca_bd
LOC_Os03g10770	5494851	5496218	AT1G27740	9654688	9656089	between_species_paralog	4	2	IPR001092	HLH_basic
LOC_Os03g42100	23431490	23432886	AT1G27740	9654688	9656089	between_species_paralog	3	2	IPR001092	HLH_basic
LOC_Os03g55550	31601452	31604383	AT1G27740	9654688	9656089	between_species_paralog	3	2	IPR001092	HLH_basic
LOC_Os03g10770	5494851	5496218	AT1G27740	9654688	9656089	between_species_paralog	4	2	IPR001092	HLH_basic
LOC_Os03g42100	23431490	23432886	AT1G27740	9654688	9656089	between_species_paralog	3	2	IPR001092	HLH_basic
LOC_Os03g55550	31601452	31604383	AT1G27740	9654688	9656089	between_species_paralog	3	2	IPR001092	HLH_basic
LOC_Os03g50885	29067047	29068922	AT1G49240	18215872	18218313	ortholog_many2many	3	1	IPR004000	Actin-like
LOC_Os03g61970	35118388	35122232	AT1G49240	18215872	18218313	between_species_paralog	3	1	IPR004000	Actin-like
LOC_Os03g18820	10545944	10548430	AT1G74380	27959578	27961454	between_species_paralog	2	1	IPR008630	Glyco_trans_34
LOC_Os03g40130	22297079	22298639	AT2G03720	1132170	1133379	ortholog_many2many	3	1	IPR006016	UspA
LOC_Os03g08860	4591491	4593913	AT2G22475	9541401	9545010	between_species_paralog	3	1	IPR004182	GRAM
LOC_Os03g52670	30191016	30193546	AT2G22475	9541401	9545010	between_species_paralog	2	1	IPR004182	GRAM
LOC_Os03g55380	31496588	31500631	AT2G23096	9834766	9836235	ortholog_one2many	4	2	IPR006620	Pro_4_hyd_alph
LOC_Os03g58330	33225976	33230471	AT2G24260	10319334	10322222	between_species_paralog	3	2	IPR001092	HLH_basic
LOC_Os03g15550	8557683	8561739	AT2G26420	11239434	11242239	ortholog_many2many	6	2	IPR016034	PInositol-4P-5-kinase_core_sub
LOC_Os03g24160	13710991	13715475	AT2G26420	11239434	11242239	between_species_paralog	6	4	IPR016034	PInositol-4P-5-kinase_core_sub
LOC_Os03g24170	13718533	13722028	AT2G26420	11239434	11242239	between_species_paralog	5	2	IPR016034	PInositol-4P-5-kinase_core_sub
LOC_Os03g49800	28351148	28355664	AT2G26420	11239434	11242239	ortholog_many2many	5	4	IPR016034	PInositol-4P-5-kinase_core_sub
LOC_Os03g28120	16162636	16165697	AT2G26650	11331850	11336607	between_species_paralog	8	2	IPR003938	K_chnl_volt-dep_EAG/ELK/ERG
LOC_Os03g14840	8086099	8087890	AT2G34650	14589760	14591788	between_species_paralog	8	4	IPR002290	Ser_thr_pkinase
LOC_Os03g44020	24742151	24743813	AT2G34650	14589760	14591788	ortholog_one2many	8	4	IPR002290	Ser_thr_pkinase
LOC_Os03g38930	21621453	21627182	AT2G35610	14947365	14951247	ortholog_one2one	1	0
LOC_Os03g50885	29067047	29068922	AT2G37620	15779174	15781561	between_species_paralog	3	1	IPR004000	Actin-like
LOC_Os03g61970	35118388	35122232	AT2G37620	15779174	15781561	between_species_paralog	3	1	IPR004000	Actin-like
LOC_Os03g14080	7645584	7649497	AT2G38120	15972993	15977180	between_species_paralog	2	1	IPR013057	AA_transpt_TM
LOC_Os03g06990	3565773	3567817	AT3G06300	1907582	1909804	between_species_paralog	4	2	IPR006620	Pro_4_hyd_alph
LOC_Os03g07000	3568973	3570880	AT3G06300	1907582	1909804	between_species_paralog	4	3	IPR006620	Pro_4_hyd_alph
LOC_Os03g58880	33512720	33515111	AT3G06300	1907582	1909804	between_species_paralog	4	3	IPR006620	Pro_4_hyd_alph
LOC_Os03g58890	33515389	33517395	AT3G06300	1907582	1909804	between_species_paralog	4	3	IPR006620	Pro_4_hyd_alph
LOC_Os03g50885	29067047	29068922	AT3G18780	6474842	6477204	ortholog_many2many	3	1	IPR004000	Actin-like
LOC_Os03g61970	35118388	35122232	AT3G18780	6474842	6477204	between_species_paralog	3	1	IPR004000	Actin-like
LOC_Os03g15440	8457069	8460020	AT3G25710	9369519	9371394	ortholog_many2many	3	2	IPR001092	HLH_basic
LOC_Os03g59670	33966535	33968447	AT3G25710	9369519	9371394	between_species_paralog	3	2	IPR001092	HLH_basic
LOC_Os03g54130	31016266	31018114	AT3G43960	15774055	15775657	between_species_paralog	4	2	IPR013201	Prot_inhib_I29
LOC_Os03g05820	2912917	2921879	AT3G54870	20330806	20336717	ortholog_one2one	6	3	IPR000225	Armadillo
LOC_Os03g53650	30752891	30756850	AT3G61440	22735663	22738126	between_species_paralog	7	3	IPR005856	Cys_synthKM
LOC_Os03g18820	10545944	10548430	AT3G62720	23201117	23202913	ortholog_one2many	2	1	IPR008630	Glyco_trans_34
LOC_Os03g01890	548821	556907	AT4G00730	299359	304508	between_species_paralog	7	3	IPR001356	Homeobox
LOC_Os03g43930	24649879	24655729	AT4G00730	299359	304508	between_species_paralog	7	3	IPR001356	Homeobox
LOC_Os03g18820	10545944	10548430	AT4G02500	1101507	1103610	ortholog_one2many	2	1	IPR008630	Glyco_trans_34
LOC_Os03g59340	33772883	33779337	AT4G15290	8721487	8726669	between_species_paralog	4	1	IPR005150	Cellulose_synth
LOC_Os03g62090	35170441	35176292	AT4G15290	8721487	8726669	between_species_paralog	4	1	IPR005150	Cellulose_synth
LOC_Os03g18370	10291207	10294586	AT4G18640	10259678	10263764	between_species_paralog	8	3	IPR002290	Ser_thr_pkinase
LOC_Os03g24220	13775686	13787404	AT4G30160	14753349	14760189	between_species_paralog	4	3	IPR007122	Gelsolin
LOC_Os03g58330	33225976	33230471	AT4G30980	15079243	15081657	between_species_paralog	3	2	IPR001092	HLH_basic
LOC_Os03g10770	5494851	5496218	AT4G33880	16239363	16241137	ortholog_many2many	4	2	IPR001092	HLH_basic
LOC_Os03g42100	23431490	23432886	AT4G33880	16239363	16241137	ortholog_many2many	3	2	IPR001092	HLH_basic
LOC_Os03g55550	31601452	31604383	AT4G33880	16239363	16241137	ortholog_many2many	3	2	IPR001092	HLH_basic
LOC_Os03g49400	28109674	28117271	AT5G03280	787428	793356	ortholog_one2many	3	2	IPR001046	Nat-R-assoc-macro_Nramp
LOC_Os03g02030	639595	644673	AT5G05980	1799490	1804492	ortholog_many2many	5	3	IPR004101	Mur_ligase_C
LOC_Os03g50885	29067047	29068922	AT5G09810	3052097	3054614	between_species_paralog	3	1	IPR004000	Actin-like
LOC_Os03g61970	35118388	35122232	AT5G09810	3052097	3054614	ortholog_one2many	3	1	IPR004000	Actin-like
LOC_Os03g48140	27367888	27380565	AT5G20490	6926623	6937506	ortholog_one2many	9	5	IPR004009	Myosin_N
LOC_Os03g48140	27367888	27380565	AT5G43900	17656894	17667451	between_species_paralog	7	5	IPR004009	Myosin_N
LOC_Os03g18910	10597868	10600446	AT5G49270	19971909	19974444	between_species_paralog	4	2	IPR006918	GPI-anchored_pln
LOC_Os03g42130	23448338	23450345	AT5G51310	20852854	20854718	between_species_paralog	3	2	IPR002283	Isopenicillin-N_synthase
LOC_Os03g58330	33225976	33230471	AT5G58010	23483545	23484889	between_species_paralog	3	2	IPR001092	HLH_basic
LOC_Os03g64330	36353515	36354613	AT5G60660	24375457	24376989	ortholog_many2many	3	2	IPR012269	Aquaporin
LOC_Os03g06460	3227973	3232504	AT5G65090	26004017	26006851	between_species_paralog	3	2	IPR005135	Endo/exonuclease/phosphatase
LOC_Os03g13520	7304253	7307499	AT5G65090	26004017	26006851	between_species_paralog	3	2	IPR005135	Endo/exonuclease/phosphatase
LOC_Os03g46090	26062166	26067058	AT5G65090	26004017	26006851	between_species_paralog	3	2	IPR005135	Endo/exonuclease/phosphatase
LOC_Os03g57950	33003825	33007266	AT5G65090	26004017	26006851	between_species_paralog	3	2	IPR005135	Endo/exonuclease/phosphatase
LOC_Os04g49230	29181322	29183381	AT1G13260	4542168	4543742	between_species_paralog	5	1	IPR003340	TF_B3
LOC_Os04g02690	1019683	1021891	AT1G13980	4788463	4794654	between_species_paralog	4	2	IPR000904	Sec7
LOC_Os04g38620	22758069	22761770	AT1G18800	6481113	6483596	ortholog_many2many	2	1	IPR002164	NAP_family
LOC_Os04g56850	33702900	33709289	AT1G19220	6628068	6633087	between_species_paralog	5	2	IPR003340	TF_B3
LOC_Os04g20680	11560043	11565349	AT1G21210	7424106	7427041	ortholog_many2many	14	7	IPR002290	Ser_thr_pkinase
LOC_Os04g29770	17567650	17569916	AT1G21210	7424106	7427041	ortholog_many2many	12	4	IPR002290	Ser_thr_pkinase
LOC_Os04g29930	17674090	17678257	AT1G21210	7424106	7427041	ortholog_many2many	14	5	IPR002290	Ser_thr_pkinase
LOC_Os04g29960	17702355	17705322	AT1G21210	7424106	7427041	ortholog_many2many	14	7	IPR002290	Ser_thr_pkinase
LOC_Os04g29990	17716187	17719615	AT1G21210	7424106	7427041	ortholog_many2many	14	6	IPR002290	Ser_thr_pkinase
LOC_Os04g30010	17734138	17737843	AT1G21210	7424106	7427041	ortholog_many2many	14	7	IPR002290	Ser_thr_pkinase
LOC_Os04g30060	17772809	17773846	AT1G21210	7424106	7427041	ortholog_many2many	12	4	IPR002290	Ser_thr_pkinase
LOC_Os04g30160	17829060	17833437	AT1G21210	7424106	7427041	ortholog_many2many	14	6	IPR002290	Ser_thr_pkinase
LOC_Os04g30240	17870170	17877479	AT1G21210	7424106	7427041	ortholog_many2many	14	6	IPR002290	Ser_thr_pkinase
LOC_Os04g30260	17889490	17892841	AT1G21210	7424106	7427041	ortholog_many2many	12	5	IPR002290	Ser_thr_pkinase
LOC_Os04g30270	17897398	17900608	AT1G21210	7424106	7427041	ortholog_many2many	12	4	IPR002290	Ser_thr_pkinase
LOC_Os04g30370	17949471	17954182	AT1G21210	7424106	7427041	ortholog_many2many	13	4	IPR002290	Ser_thr_pkinase
LOC_Os04g43730	25699618	25703158	AT1G21210	7424106	7427041	ortholog_many2many	13	4	IPR002290	Ser_thr_pkinase
LOC_Os04g51040	30029935	30032564	AT1G21210	7424106	7427041	between_species_paralog	16	7	IPR002290	Ser_thr_pkinase
LOC_Os04g51050	30035161	30038861	AT1G21210	7424106	7427041	between_species_paralog	16	7	IPR002290	Ser_thr_pkinase
LOC_Os04g38950	22954013	22957676	AT1G25220	8836835	8839549	ortholog_many2many	9	5	IPR011702	GATASE
LOC_Os04g39940	23597226	23599678	AT1G31880	11445490	11450189	ortholog_many2many	2	1	IPR013591	DiseaseR/Znf/csome_condsation
LOC_Os04g51172	30112737	30120480	AT1G31880	11445490	11450189	ortholog_many2many	2	1	IPR013591	DiseaseR/Znf/csome_condsation
LOC_Os04g57640	34128980	34135044	AT1G32230	11612118	11616218	between_species_paralog	5	1	IPR012317	PARP_catalytic
LOC_Os04g43560	25588204	25591106	AT1G56010	20946571	20949281	between_species_paralog	3	1	IPR003441	NAM
LOC_Os04g52810	31254493	31258295	AT1G56010	20946571	20949281	ortholog_many2many	2	1	IPR003441	NAM
LOC_Os04g38620	22758069	22761770	AT1G74560	28017584	28020049	ortholog_many2many	2	1	IPR002164	NAP_family
LOC_Os04g02970	1196752	1198467	AT2G04160	1401268	1407745	between_species_paralog	4	1	IPR000209	Peptidase_S8/S53
LOC_Os04g02980	1205047	1214576	AT2G04160	1401268	1407745	between_species_paralog	4	3	IPR000209	Peptidase_S8/S53
LOC_Os04g02990	1216463	1216979	AT2G04160	1401268	1407745	between_species_paralog	4	0
LOC_Os04g03050	1244000	1255841	AT2G04160	1401268	1407745	between_species_paralog	4	3	IPR000209	Peptidase_S8/S53
LOC_Os04g03080	1261668	1265449	AT2G04160	1401268	1407745	between_species_paralog	4	0
LOC_Os04g03100	1275498	1280650	AT2G04160	1401268	1407745	between_species_paralog	4	3	IPR000209	Peptidase_S8/S53
LOC_Os04g03796	1697552	1706068	AT2G04160	1401268	1407745	between_species_paralog	5	3	IPR000209	Peptidase_S8/S53
LOC_Os04g03810	1710201	1715904	AT2G04160	1401268	1407745	between_species_paralog	4	3	IPR000209	Peptidase_S8/S53
LOC_Os04g03850	1732179	1736597	AT2G04160	1401268	1407745	between_species_paralog	4	1	IPR000209	Peptidase_S8/S53
LOC_Os04g23910	13663424	13666598	AT2G14210	6018558	6023863	between_species_paralog	3	2	IPR002100	TF_MADSbox
LOC_Os04g38770	22855052	22856377	AT2G14210	6018558	6023863	ortholog_one2many	3	1	IPR002100	TF_MADSbox
LOC_Os04g38780	22860546	22863165	AT2G14210	6018558	6023863	between_species_paralog	3	1	IPR002487	TF_Kbox
LOC_Os04g57640	34128980	34135044	AT2G35510	14916723	14920377	between_species_paralog	4	1	IPR012317	PARP_catalytic
LOC_Os04g38720	22809444	22811632	AT3G15170	5109883	5111447	between_species_paralog	2	1	IPR003441	NAM
LOC_Os04g43070	25315018	25317493	AT3G24300	8805631	8807388	ortholog_many2many	3	1	IPR001905	Ammonium_transpt
LOC_Os04g35890	21706986	21709832	AT3G59420	21959647	21963041	between_species_paralog	12	5	IPR002290	Ser_thr_pkinase
LOC_Os04g46810	27554913	27555674	AT4G12550	7439115	7439805	ortholog_many2many	3	2	IPR016140	Bifunc_inhib/LTP/seed_store
LOC_Os04g46820	27558202	27558597	AT4G12550	7439115	7439805	ortholog_many2many	4	2	IPR016140	Bifunc_inhib/LTP/seed_store
LOC_Os04g46830	27568228	27569394	AT4G12550	7439115	7439805	between_species_paralog	3	2	IPR016140	Bifunc_inhib/LTP/seed_store
LOC_Os04g52250	30866056	30866925	AT4G12550	7439115	7439805	between_species_paralog	5	2	IPR016140	Bifunc_inhib/LTP/seed_store
LOC_Os04g52260	30876568	30877589	AT4G12550	7439115	7439805	between_species_paralog	3	2	IPR016140	Bifunc_inhib/LTP/seed_store
LOC_Os04g55170	32612666	32612935	AT4G12550	7439115	7439805	between_species_paralog	3	2	IPR016140	Bifunc_inhib/LTP/seed_store
LOC_Os04g43070	25315018	25317493	AT4G13510	7858183	7859918	ortholog_many2many	3	1	IPR001905	Ammonium_transpt
LOC_Os04g24710	14176593	14178503	AT4G33495	16110712	16112597	between_species_paralog	2	1	IPR001578	Peptidase_C12
LOC_Os04g46170	27160145	27162688	AT4G33495	16110712	16112597	between_species_paralog	2	1	IPR001578	Peptidase_C12
LOC_Os04g58870	34831477	34835678	AT5G03540	889566	894167	ortholog_many2many	2	1	IPR004140	Exo70
LOC_Os04g58880	34836503	34843057	AT5G03540	889566	894167	ortholog_many2many	2	1	IPR004140	Exo70
LOC_Os04g46060	27099144	27105852	AT5G13080	4149740	4151150	between_species_paralog	2	1	IPR003657	WRKY_DNA_bd
LOC_Os04g32790	19618461	19619872	AT5G18560	6164587	6165991	between_species_paralog	4	2	IPR001471	TF_ERF_DNA-bd
LOC_Os04g56850	33702900	33709289	AT5G20730	7016445	7022113	between_species_paralog	6	2	IPR003340	TF_B3
LOC_Os04g38900	22930974	22932817	AT5G40770	16314850	16316719	ortholog_many2many	4	2	IPR000163	Prohibitin
LOC_Os04g51450	30288242	30290038	AT2G18800	8144912	8146265	between_species_paralog	7	4	IPR016455	XET
LOC_Os04g51460	30296960	30298370	AT2G18800	8144912	8146265	between_species_paralog	8	5	IPR016455	XET
LOC_Os04g51510	30333805	30334989	AT2G18800	8144912	8146265	between_species_paralog	8	4	IPR008264	Beta_glucanase
LOC_Os04g51520	30335231	30338431	AT2G18800	8144912	8146265	between_species_paralog	7	5	IPR016455	XET
LOC_Os04g59470	35173484	35174341	AT1G33280	12072741	12073839	between_species_paralog	2	1	IPR003441	NAM
LOC_Os04g59470	35173484	35174341	AT1G79580	29940850	29943602	between_species_paralog	2	1	IPR003441	NAM
LOC_Os04g43910	25828293	25831062	AT2G28350	12114331	12116848	between_species_paralog	4	2	IPR003340	TF_B3
LOC_Os04g59430	35144412	35148028	AT2G28350	12114331	12116848	between_species_paralog	4	2	IPR003340	TF_B3
LOC_Os04g35890	21706986	21709832	AT3G59420	21959647	21963041	between_species_paralog	12	5	IPR002290	Ser_thr_pkinase
LOC_Os04g59470	35173484	35174341	AT4G10350	6415256	6416829	between_species_paralog	2	1	IPR003441	NAM
LOC_Os04g43910	25828293	25831062	AT4G30080	14703201	14706336	between_species_paralog	4	2	IPR003340	TF_B3
LOC_Os04g59430	35144412	35148028	AT4G30080	14703201	14706336	between_species_paralog	4	2	IPR003340	TF_B3
LOC_Os04g53070	31424395	31425729	AT1G06230	1906963	1910848	between_species_paralog	2	0
LOC_Os04g53130	31460557	31463983	AT1G06230	1906963	1910848	between_species_paralog	2	1	IPR001487	Bromodomain
LOC_Os04g53170	31478155	31480304	AT1G06230	1906963	1910848	between_species_paralog	2	1	IPR001487	Bromodomain
LOC_Os04g49230	29181322	29183381	AT1G13260	4542168	4543742	between_species_paralog	5	1	IPR003340	TF_B3
LOC_Os04g56850	33702900	33709289	AT1G19220	6628068	6633087	between_species_paralog	5	2	IPR003340	TF_B3
LOC_Os04g56850	33702900	33709289	AT1G19850	6886879	6891374	ortholog_one2one	5	3	IPR003340	TF_B3
LOC_Os04g20680	11560043	11565349	AT1G21210	7424106	7427041	ortholog_many2many	14	7	IPR002290	Ser_thr_pkinase
LOC_Os04g29770	17567650	17569916	AT1G21210	7424106	7427041	ortholog_many2many	12	4	IPR002290	Ser_thr_pkinase
LOC_Os04g29930	17674090	17678257	AT1G21210	7424106	7427041	ortholog_many2many	14	5	IPR002290	Ser_thr_pkinase
LOC_Os04g29960	17702355	17705322	AT1G21210	7424106	7427041	ortholog_many2many	14	7	IPR002290	Ser_thr_pkinase
LOC_Os04g29990	17716187	17719615	AT1G21210	7424106	7427041	ortholog_many2many	14	6	IPR002290	Ser_thr_pkinase
LOC_Os04g30010	17734138	17737843	AT1G21210	7424106	7427041	ortholog_many2many	14	7	IPR002290	Ser_thr_pkinase
LOC_Os04g30060	17772809	17773846	AT1G21210	7424106	7427041	ortholog_many2many	12	4	IPR002290	Ser_thr_pkinase
LOC_Os04g30160	17829060	17833437	AT1G21210	7424106	7427041	ortholog_many2many	14	6	IPR002290	Ser_thr_pkinase
LOC_Os04g30240	17870170	17877479	AT1G21210	7424106	7427041	ortholog_many2many	14	6	IPR002290	Ser_thr_pkinase
LOC_Os04g30260	17889490	17892841	AT1G21210	7424106	7427041	ortholog_many2many	12	5	IPR002290	Ser_thr_pkinase
LOC_Os04g30270	17897398	17900608	AT1G21210	7424106	7427041	ortholog_many2many	12	4	IPR002290	Ser_thr_pkinase
LOC_Os04g30370	17949471	17954182	AT1G21210	7424106	7427041	ortholog_many2many	13	4	IPR002290	Ser_thr_pkinase
LOC_Os04g43730	25699618	25703158	AT1G21210	7424106	7427041	ortholog_many2many	13	4	IPR002290	Ser_thr_pkinase
LOC_Os04g51040	30029935	30032564	AT1G21210	7424106	7427041	between_species_paralog	16	7	IPR002290	Ser_thr_pkinase
LOC_Os04g51050	30035161	30038861	AT1G21210	7424106	7427041	between_species_paralog	16	7	IPR002290	Ser_thr_pkinase
LOC_Os04g39940	23597226	23599678	AT1G31880	11445490	11450189	ortholog_many2many	2	1	IPR013591	DiseaseR/Znf/csome_condsation
LOC_Os04g51172	30112737	30120480	AT1G31880	11445490	11450189	ortholog_many2many	2	1	IPR013591	DiseaseR/Znf/csome_condsation
LOC_Os04g39940	23597226	23599678	AT1G31880	11445490	11450189	ortholog_many2many	2	1	IPR013591	DiseaseR/Znf/csome_condsation
LOC_Os04g51172	30112737	30120480	AT1G31880	11445490	11450189	ortholog_many2many	2	1	IPR013591	DiseaseR/Znf/csome_condsation
LOC_Os04g35280	21279544	21284091	AT1G35580	13122204	13125264	ortholog_many2many	4	2	IPR006937	Invertase_neut
LOC_Os04g47870	28241359	28256477	AT1G48410	17885633	17892596	ortholog_one2many	5	4	IPR014811	DUF1785
LOC_Os04g52540	31054075	31058323	AT1G48410	17885633	17892596	between_species_paralog	6	4	IPR014811	DUF1785
LOC_Os04g52550	31059338	31064566	AT1G48410	17885633	17892596	between_species_paralog	6	4	IPR014811	DUF1785
LOC_Os04g52960	31359023	31366140	AT1G48920	18098095	18101623	ortholog_many2many	3	1	IPR000504	RRM_RNP1
LOC_Os04g42570	24997062	25001536	AT1G51190	18977284	18980618	between_species_paralog	3	2	IPR001471	TF_ERF_DNA-bd
LOC_Os04g55970	33156868	33161452	AT1G51190	18977284	18980618	between_species_paralog	3	2	IPR001471	TF_ERF_DNA-bd
LOC_Os04g51690	30436035	30443247	AT1G51590	19128144	19132318	ortholog_one2many	2	1	IPR001382	Glyco_hydro_47
LOC_Os04g47170	27828583	27831867	AT1G52240	19455766	19459586	between_species_paralog	3	1	IPR005512	Rop_nucl_exchang_PRONE
LOC_Os04g52725	31213596	31215085	AT1G53330	19896027	19897442	between_species_paralog	2	1	IPR002885	Pentatricopeptide_repeat
LOC_Os04g43560	25588204	25591106	AT1G56010	20946571	20949281	between_species_paralog	3	1	IPR003441	NAM
LOC_Os04g52810	31254493	31258295	AT1G56010	20946571	20949281	ortholog_many2many	2	1	IPR003441	NAM
LOC_Os04g33490	20084182	20087562	AT1G56560	21192499	21195112	between_species_paralog	4	2	IPR006937	Invertase_neut
LOC_Os04g47270	27881961	27885236	AT1G62830	23264490	23267202	between_species_paralog	6	4	IPR000960	Flavin_mOase
LOC_Os04g49150	29123109	29128978	AT1G71692	26952645	26955127	between_species_paralog	3	2	IPR002100	TF_MADSbox
LOC_Os04g54900	32472642	32473079	AT1G74500	27998175	27998821	ortholog_many2many	3	2	IPR001092	HLH_basic
LOC_Os04g43910	25828293	25831062	AT1G77850	29272313	29275419	between_species_paralog	3	2	IPR003340	TF_B3
LOC_Os04g59430	35144412	35148028	AT1G77850	29272313	29275419	ortholog_one2many	3	2	IPR003340	TF_B3
LOC_Os04g23910	13663424	13666598	AT2G14210	6018558	6023863	between_species_paralog	3	2	IPR002100	TF_MADSbox
LOC_Os04g38770	22855052	22856377	AT2G14210	6018558	6023863	ortholog_one2many	3	1	IPR002100	TF_MADSbox
LOC_Os04g38780	22860546	22863165	AT2G14210	6018558	6023863	between_species_paralog	3	1	IPR002487	TF_Kbox
LOC_Os04g51450	30288242	30290038	AT2G18800	8144912	8146265	between_species_paralog	7	4	IPR016455	XET
LOC_Os04g51460	30296960	30298370	AT2G18800	8144912	8146265	between_species_paralog	8	5	IPR016455	XET
LOC_Os04g51510	30333805	30334989	AT2G18800	8144912	8146265	between_species_paralog	8	4	IPR008264	Beta_glucanase
LOC_Os04g51520	30335231	30338431	AT2G18800	8144912	8146265	between_species_paralog	7	5	IPR016455	XET
LOC_Os04g57540	34051299	34053774	AT2G37250	15641906	15643786	between_species_paralog	4	2	IPR006259	Adenyl_kin_sub
LOC_Os04g38720	22809444	22811632	AT3G15170	5109883	5111447	between_species_paralog	2	1	IPR003441	NAM
LOC_Os04g42570	24997062	25001536	AT3G20840	7300675	7303693	between_species_paralog	3	2	IPR001471	TF_ERF_DNA-bd
LOC_Os04g55970	33156868	33161452	AT3G20840	7300675	7303693	between_species_paralog	3	2	IPR001471	TF_ERF_DNA-bd
LOC_Os04g51690	30436035	30443247	AT3G21160	7413847	7418410	ortholog_one2many	2	1	IPR001382	Glyco_hydro_47
LOC_Os04g48070	28415549	28421889	AT4G00730	299359	304508	ortholog_many2many	9	3	IPR001356	Homeobox
LOC_Os04g53540	31714613	31722017	AT4G00730	299359	304508	between_species_paralog	7	3	IPR001356	Homeobox
LOC_Os04g35280	21279544	21284091	AT4G09510	6021164	6023873	ortholog_many2many	4	2	IPR006937	Invertase_neut
LOC_Os04g46350	27292442	27294580	AT4G16780	9449114	9450743	between_species_paralog	9	4	IPR000047	HTH_lambrepressr
LOC_Os04g40460	23858741	23861915	AT4G31500	15273471	15275310	between_species_paralog	6	3	IPR001128	Cyt_P450
LOC_Os04g40470	23863931	23866003	AT4G31500	15273471	15275310	between_species_paralog	6	3	IPR001128	Cyt_P450
LOC_Os04g58870	34831477	34835678	AT5G03540	889566	894167	ortholog_many2many	2	1	IPR004140	Exo70
LOC_Os04g58880	34836503	34843057	AT5G03540	889566	894167	ortholog_many2many	2	1	IPR004140	Exo70
LOC_Os04g52140	30788992	30794729	AT5G03730	974498	979849	between_species_paralog	10	4	IPR002290	Ser_thr_pkinase
LOC_Os04g08060	4291937	4293177	AT5G04340	1216131	1217106	between_species_paralog	4	2	IPR015880	Znf_C2H2-like
LOC_Os04g42570	24997062	25001536	AT5G10510	3315529	3320202	between_species_paralog	3	2	IPR001471	TF_ERF_DNA-bd
LOC_Os04g55970	33156868	33161452	AT5G10510	3315529	3320202	between_species_paralog	3	2	IPR001471	TF_ERF_DNA-bd
LOC_Os04g46060	27099144	27105852	AT5G13080	4149740	4151150	between_species_paralog	2	1	IPR003657	WRKY_DNA_bd
LOC_Os04g31320	18563504	18566100	AT5G14170	4568509	4570947	ortholog_one2many	4	2	IPR003121	SWIB_MDM2_domain
LOC_Os04g56850	33702900	33709289	AT5G20730	7016445	7022113	between_species_paralog	6	2	IPR003340	TF_B3
LOC_Os04g38900	22930974	22932817	AT5G40770	16314850	16316719	ortholog_many2many	4	2	IPR000163	Prohibitin
LOC_Os04g01140	98618	100643	AT5G47990	19434827	19436689	ortholog_many2many	6	3	IPR001128	Cyt_P450
LOC_Os04g39430	23281983	23286449	AT5G48000	19444138	19447850	between_species_paralog	11	4	IPR002397	Cyt_P450_B
LOC_Os04g48170	28487598	28492076	AT5G48000	19444138	19447850	ortholog_many2many	7	3	IPR001128	Cyt_P450
LOC_Os04g48200	28518790	28523047	AT5G48000	19444138	19447850	ortholog_many2many	7	4	IPR002397	Cyt_P450_B
LOC_Os04g48210	28530283	28535656	AT5G48000	19444138	19447850	ortholog_many2many	7	4	IPR002397	Cyt_P450_B
LOC_Os04g21570	12187757	12188609	AT5G55730	22558148	22560461	between_species_paralog	2	1	IPR000782	FAS1_domain
LOC_Os04g39590	23412950	23414118	AT5G55730	22558148	22560461	between_species_paralog	2	1	IPR000782	FAS1_domain
LOC_Os04g39600	23414397	23415562	AT5G55730	22558148	22560461	between_species_paralog	2	1	IPR000782	FAS1_domain
LOC_Os04g48490	28725108	28726790	AT5G55730	22558148	22560461	between_species_paralog	4	1	IPR000782	FAS1_domain
LOC_Os04g42570	24997062	25001536	AT5G57390	23253459	23256450	between_species_paralog	3	2	IPR001471	TF_ERF_DNA-bd
LOC_Os04g55970	33156868	33161452	AT5G57390	23253459	23256450	ortholog_one2many	3	2	IPR001471	TF_ERF_DNA-bd
LOC_Os04g33900	20362115	20362818	AT5G59030	23833728	23834511	ortholog_many2many	2	1	IPR007274	Cop_transporter
LOC_Os04g47990	28349152	28352406	AT5G60200	24240975	24242523	between_species_paralog	3	1	IPR003851	Znf_Dof
LOC_Os04g54200	32101553	32106351	AT5G63770	25518641	25523621	between_species_paralog	5	2	IPR001206	Diacylglycerol_kinase_cat
LOC_Os04g45810	26939036	26940382	AT5G66700	26634320	26635885	between_species_paralog	8	4	IPR000047	HTH_lambrepressr
LOC_Os04g02690	1019683	1021891	AT1G13980	4788463	4794654	between_species_paralog	4	2	IPR000904	Sec7
LOC_Os04g47170	27828583	27831867	AT1G52240	19455766	19459586	between_species_paralog	3	1	IPR005512	Rop_nucl_exchang_PRONE
LOC_Os04g44500	26157316	26158654	AT2G22475	9541401	9545010	between_species_paralog	1	1	IPR004182	GRAM
LOC_Os04g44510	26162184	26163376	AT2G22475	9541401	9545010	between_species_paralog	2	1	IPR004182	GRAM
LOC_Os04g02720	1038239	1040495	AT2G26650	11331850	11336607	between_species_paralog	8	3	IPR018490	cNMP_bd-like
LOC_Os04g36740	22006923	22012320	AT2G26650	11331850	11336607	between_species_paralog	8	5	IPR000595	cNMP_bd
LOC_Os04g46860	27579528	27582190	AT2G45160	18617862	18620150	ortholog_many2many	2	1	IPR005202	GRAS
LOC_Os04g47170	27828583	27831867	AT2G45890	18883473	18885566	ortholog_many2many	2	1	IPR005512	Rop_nucl_exchang_PRONE
LOC_Os04g54930	32486806	32493209	AT2G47000	19309868	19315241	between_species_paralog	6	3	IPR003439	ABC_transporter-like
LOC_Os04g12660	7004230	7005359	AT3G43960	15774055	15775657	between_species_paralog	4	2	IPR013201	Prot_inhib_I29
LOC_Os04g13090	7216596	7217710	AT3G43960	15774055	15775657	between_species_paralog	4	2	IPR013201	Prot_inhib_I29
LOC_Os04g13140	7245628	7247116	AT3G43960	15774055	15775657	between_species_paralog	4	2	IPR013201	Prot_inhib_I29
LOC_Os04g55650	32937960	32941876	AT3G43960	15774055	15775657	ortholog_one2many	5	1	IPR000668	Peptidase_C1A_C
LOC_Os04g57440	33987390	33991628	AT3G43960	15774055	15775657	between_species_paralog	10	2	IPR013201	Prot_inhib_I29
LOC_Os04g57490	34020890	34022802	AT3G43960	15774055	15775657	between_species_paralog	6	2	IPR013201	Prot_inhib_I29
LOC_Os04g46860	27579528	27582190	AT3G60630	22410365	22412608	ortholog_many2many	2	1	IPR005202	GRAS
LOC_Os04g08350	4453004	4457449	AT3G61440	22735663	22738126	ortholog_one2one	6	4	IPR005856	Cys_synthKM
LOC_Os04g46860	27579528	27582190	AT4G00150	57199	59286	ortholog_many2many	2	1	IPR005202	GRAS
LOC_Os04g48070	28415549	28421889	AT4G00730	299359	304508	ortholog_many2many	9	3	IPR001356	Homeobox
LOC_Os04g53540	31714613	31722017	AT4G00730	299359	304508	between_species_paralog	7	3	IPR001356	Homeobox
LOC_Os04g35020	21109766	21113314	AT4G15290	8721487	8726669	ortholog_many2many	2	1	IPR005150	Cellulose_synth
LOC_Os04g35030	21116184	21121697	AT4G15290	8721487	8726669	ortholog_many2many	2	0
LOC_Os04g45170	26518207	26523443	AT4G18640	10259678	10263764	between_species_paralog	9	4	IPR001611	Leu-rich_rpt
LOC_Os04g58700	34716478	34722255	AT4G18640	10259678	10263764	between_species_paralog	10	5	IPR002290	Ser_thr_pkinase
LOC_Os04g39610	23421483	23426363	AT4G26690	13456434	13460060	ortholog_many2many	3	2	IPR017946	PLC-like_Pdiesterase_TIM-brl
LOC_Os04g51440	30278742	30287878	AT4G30160	14753349	14760189	ortholog_many2many	4	3	IPR007122	Gelsolin
LOC_Os04g55070	32562078	32565717	AT5G51310	20852854	20854718	possible_ortholog	3	1	IPR005123	Oxoglutarate/Fe-dep_oxygenase
LOC_Os04g16450	8943483	8945304	AT5G60660	24375457	24376989	between_species_paralog	3	2	IPR012269	Aquaporin
LOC_Os04g44060	25914148	25916657	AT5G60660	24375457	24376989	ortholog_many2many	3	2	IPR012269	Aquaporin
LOC_Os05g34150	20129834	20131259	AT1G10370	3397081	3398358	ortholog_many2many	6	4	IPR004046	GST_C
LOC_Os05g05800	2892472	2899089	AT1G12820	4368760	4371293	between_species_paralog	5	2	IPR001810	F-box
LOC_Os05g47650	27240341	27241953	AT1G13260	4542168	4543742	ortholog_many2many	6	3	IPR001471	TF_ERF_DNA-bd
LOC_Os05g27540	15968781	15970314	AT1G13980	4788463	4794654	between_species_paralog	3	0
LOC_Os05g14730	8367279	8370265	AT1G15570	5362009	5365549	between_species_paralog	5	5	IPR004367	Cyclin_C
LOC_Os05g35110	20784613	20788538	AT1G21410	7497141	7499579	ortholog_many2many	4	2	IPR001810	F-box
LOC_Os05g23880	13676611	13683112	AT1G55020	20525708	20530273	between_species_paralog	5	4	IPR013819	LipOase_C
LOC_Os05g37470	21864241	21869515	AT1G77690	29200941	29203340	between_species_paralog	3	1	IPR013057	AA_transpt_TM
LOC_Os05g37470	21864241	21869515	AT2G38120	15972993	15977180	ortholog_many2many	3	1	IPR013057	AA_transpt_TM
LOC_Os05g28350	16543079	16544295	AT2G40220	16796599	16797585	ortholog_one2one	7	2	IPR001471	TF_ERF_DNA-bd
LOC_Os05g23880	13676611	13683112	AT3G22400	7926879	7931351	between_species_paralog	5	4	IPR013819	LipOase_C
LOC_Os05g28320	16524652	16525769	AT3G50060	18557970	18559106	between_species_paralog	6	3	IPR001005	SANT_DNA-bd
LOC_Os05g03620	1547417	1550147	AT3G59420	21959647	21963041	between_species_paralog	13	5	IPR002290	Ser_thr_pkinase
LOC_Os05g05800	2892472	2899089	AT3G62980	23273116	23276375	ortholog_one2many	4	2	IPR001810	F-box
LOC_Os05g08570	4681437	4684521	AT4G14550	8347822	8350019	between_species_paralog	4	1	IPR003311	AUX_IAA
LOC_Os05g09480	5329559	5331468	AT4G14550	8347822	8350019	between_species_paralog	4	1	IPR003311	AUX_IAA
LOC_Os05g14180	7950813	7954327	AT4G14550	8347822	8350019	between_species_paralog	4	1	IPR003311	AUX_IAA
LOC_Os05g44810	25990336	25993688	AT4G14550	8347822	8350019	between_species_paralog	3	1	IPR003311	AUX_IAA
LOC_Os05g48590	27783244	27787748	AT4G14550	8347822	8350019	between_species_paralog	3	1	IPR003311	AUX_IAA
LOC_Os05g11710	6649489	6651860	AT4G18730	10302163	10303382	ortholog_many2many	3	1	IPR002132	Ribosomal_L5
LOC_Os05g45230	26194315	26195173	AT5G13080	4149740	4151150	between_species_paralog	3	1	IPR003657	WRKY_DNA_bd
LOC_Os05g49100	28092048	28095344	AT5G13080	4149740	4151150	between_species_paralog	3	1	IPR003657	WRKY_DNA_bd
LOC_Os05g50610	28946491	28950527	AT5G13080	4149740	4151150	between_species_paralog	3	1	IPR003657	WRKY_DNA_bd
LOC_Os05g08570	4681437	4684521	AT5G25890	9033415	9034834	between_species_paralog	4	1	IPR003311	AUX_IAA
LOC_Os05g09480	5329559	5331468	AT5G25890	9033415	9034834	between_species_paralog	4	1	IPR003311	AUX_IAA
LOC_Os05g14180	7950813	7954327	AT5G25890	9033415	9034834	between_species_paralog	4	1	IPR003311	AUX_IAA
LOC_Os05g44810	25990336	25993688	AT5G25890	9033415	9034834	ortholog_one2many	3	1	IPR003311	AUX_IAA
LOC_Os05g48590	27783244	27787748	AT5G25890	9033415	9034834	between_species_paralog	3	1	IPR003311	AUX_IAA
LOC_Os05g06340	3245180	3247479	AT5G26930	9479466	9480200	ortholog_many2many	3	1	IPR000679	Znf_GATA
LOC_Os05g49280	28209177	28210205	AT5G26930	9479466	9480200	between_species_paralog	2	1	IPR000679	Znf_GATA
LOC_Os05g50270	28754960	28756226	AT5G26930	9479466	9480200	between_species_paralog	3	1	IPR000679	Znf_GATA
LOC_Os05g45410	26281777	26284252	AT5G45710	18540850	18542863	ortholog_many2many	2	1	IPR000232	HSF_DNA_bd
LOC_Os05g02130	639550	643320	AT5G57740	23394585	23397650	between_species_paralog	5	2	IPR001841	Znf_RING
LOC_Os05g05800	2892472	2899089	AT1G12820	4368760	4371293	between_species_paralog	5	2	IPR001810	F-box
LOC_Os05g07720	4152882	4155872	AT1G23320	8273423	8275350	ortholog_many2many	3	2	IPR006948	Alliinase_C
LOC_Os05g07720	4152882	4155872	AT1G70560	26604855	26607503	ortholog_many2many	3	2	IPR006948	Alliinase_C
LOC_Os05g32890	19199064	19203080	AT2G25180	10724301	10726961	between_species_paralog	7	3	IPR006447	SHAQKYF_myb_bd
LOC_Os05g45420	26284360	26288974	AT3G01090	31181	34597	ortholog_many2many	12	6	IPR001772	Kinase-assoc_KA1
LOC_Os05g32890	19199064	19203080	AT3G16857	5755821	5759443	between_species_paralog	7	3	IPR006447	SHAQKYF_myb_bd
LOC_Os05g07720	4152882	4155872	AT4G24670	12727834	12731274	ortholog_many2many	3	2	IPR006948	Alliinase_C
LOC_Os05g32890	19199064	19203080	AT4G31920	15444117	15446959	between_species_paralog	7	3	IPR006447	SHAQKYF_myb_bd
LOC_Os05g34600	20453746	20456439	AT1G26870	9312856	9314983	between_species_paralog	3	1	IPR003441	NAM
LOC_Os05g37080	21605536	21607172	AT1G26870	9312856	9314983	between_species_paralog	2	1	IPR003441	NAM
LOC_Os05g37470	21864241	21869515	AT1G77690	29200941	29203340	between_species_paralog	3	1	IPR013057	AA_transpt_TM
LOC_Os05g37470	21864241	21869515	AT2G21050	9034090	9036636	between_species_paralog	3	1	IPR013057	AA_transpt_TM
LOC_Os05g37470	21864241	21869515	AT2G38120	15972993	15977180	ortholog_many2many	3	1	IPR013057	AA_transpt_TM
LOC_Os05g03620	1547417	1550147	AT3G59420	21959647	21963041	between_species_paralog	13	5	IPR002290	Ser_thr_pkinase
LOC_Os05g37470	21864241	21869515	AT5G01240	97894	101835	ortholog_many2many	3	1	IPR013057	AA_transpt_TM
LOC_Os05g08570	4681437	4684521	AT1G04550	1240375	1242121	between_species_paralog	4	1	IPR003311	AUX_IAA
LOC_Os05g09480	5329559	5331468	AT1G04550	1240375	1242121	between_species_paralog	4	1	IPR003311	AUX_IAA
LOC_Os05g14180	7950813	7954327	AT1G04550	1240375	1242121	between_species_paralog	4	1	IPR003311	AUX_IAA
LOC_Os05g44810	25990336	25993688	AT1G04550	1240375	1242121	between_species_paralog	3	1	IPR003311	AUX_IAA
LOC_Os05g48590	27783244	27787748	AT1G04550	1240375	1242121	between_species_paralog	3	1	IPR003311	AUX_IAA
LOC_Os05g34150	20129834	20131259	AT1G10370	3397081	3398358	ortholog_many2many	6	4	IPR004046	GST_C
LOC_Os05g05800	2892472	2899089	AT1G12820	4368760	4371293	between_species_paralog	5	2	IPR001810	F-box
LOC_Os05g05800	2892472	2899089	AT1G12820	4368760	4371293	between_species_paralog	5	2	IPR001810	F-box
LOC_Os05g47650	27240341	27241953	AT1G13260	4542168	4543742	ortholog_many2many	6	3	IPR001471	TF_ERF_DNA-bd
LOC_Os05g37190	21674717	21677188	AT1G13290	4550153	4551620	between_species_paralog	3	2	IPR015880	Znf_C2H2-like
LOC_Os05g07720	4152882	4155872	AT1G23320	8273423	8275350	ortholog_many2many	3	2	IPR006948	Alliinase_C
LOC_Os05g11850	6752164	6756336	AT1G30000	10509211	10512468	ortholog_one2one	2	1	IPR001382	Glyco_hydro_47
LOC_Os05g22940	13007093	13021023	AT1G36160	13533411	13544009	ortholog_many2many	14	9	IPR011053	Single_hybrid_motif
LOC_Os05g47890	27396718	27399220	AT1G48630	17981773	17983327	ortholog_many2many	8	4	IPR001680	WD40_repeat
LOC_Os05g38000	22230938	22234648	AT1G52240	19455766	19459586	between_species_paralog	3	1	IPR005512	Rop_nucl_exchang_PRONE
LOC_Os05g48640	27817366	27820289	AT1G52240	19455766	19459586	ortholog_many2many	3	1	IPR005512	Rop_nucl_exchang_PRONE
LOC_Os05g11700	6647079	6648266	AT1G53330	19896027	19897442	ortholog_one2one	2	1	IPR002885	Pentatricopeptide_repeat
LOC_Os05g47510	27156371	27157693	AT1G53330	19896027	19897442	between_species_paralog	2	1	IPR002885	Pentatricopeptide_repeat
LOC_Os05g23880	13676611	13683112	AT1G55020	20525708	20530273	between_species_paralog	5	4	IPR013819	LipOase_C
LOC_Os05g01030	60821	65059	AT1G59820	22011328	22020294	between_species_paralog	6	3	IPR008250	ATPase_P-typ_ATPase-assoc-reg
LOC_Os05g07720	4152882	4155872	AT1G70560	26604855	26607503	ortholog_many2many	3	2	IPR006948	Alliinase_C
LOC_Os05g11380	6426314	6434590	AT1G71692	26952645	26955127	between_species_paralog	3	1	IPR002100	TF_MADSbox
LOC_Os05g11414	6446824	6458040	AT1G71692	26952645	26955127	between_species_paralog	3	2	IPR002100	TF_MADSbox
LOC_Os05g31480	18252895	18257926	AT1G78240	29432829	29436571	between_species_paralog	3	1	IPR004159	DUF248_MeTrfase
LOC_Os05g12680	7279274	7284612	AT2G18470	8005285	8008052	between_species_paralog	10	4	IPR002290	Ser_thr_pkinase
LOC_Os05g44030	25553267	25555722	AT2G18470	8005285	8008052	between_species_paralog	8	3	IPR002290	Ser_thr_pkinase
LOC_Os05g32890	19199064	19203080	AT2G25180	10724301	10726961	between_species_paralog	7	3	IPR006447	SHAQKYF_myb_bd
LOC_Os05g38150	22311470	22318480	AT2G39800	16598072	16603319	ortholog_many2many	9	6	IPR001057	Glu_5kinase
LOC_Os05g28350	16543079	16544295	AT2G40220	16796599	16797585	ortholog_one2one	7	2	IPR001471	TF_ERF_DNA-bd
LOC_Os05g45420	26284360	26288974	AT3G01090	31181	34597	ortholog_many2many	12	6	IPR001772	Kinase-assoc_KA1
LOC_Os05g29050	16991055	17002359	AT3G05630	1635200	1640348	ortholog_many2many	5	3	IPR016555	PLipase_D_euk
LOC_Os05g29050	16991055	17002359	AT3G16785	5711082	5719023	ortholog_many2many	5	3	IPR016555	PLipase_D_euk
LOC_Os05g32890	19199064	19203080	AT3G16857	5755821	5759443	between_species_paralog	7	3	IPR006447	SHAQKYF_myb_bd
LOC_Os05g47540	27166757	27171058	AT3G18000	6154363	6157552	ortholog_many2many	7	5	IPR004033	UbiE/COQ5_MeTrFase
LOC_Os05g47545	27166938	27170742	AT3G18000	6154363	6157552	ortholog_many2many	7	2	IPR013217	Methyltransf_12
LOC_Os05g47890	27396718	27399220	AT3G18130	6210904	6212433	ortholog_many2many	8	4	IPR001680	WD40_repeat
LOC_Os05g23880	13676611	13683112	AT3G22400	7926879	7931351	between_species_paralog	5	4	IPR013819	LipOase_C
LOC_Os05g07120	3756453	3759766	AT3G25710	9369519	9371394	between_species_paralog	4	2	IPR001092	HLH_basic
LOC_Os05g28320	16524652	16525769	AT3G50060	18557970	18559106	between_species_paralog	6	3	IPR001005	SANT_DNA-bd
LOC_Os05g50130	28668677	28671601	AT4G16780	9449114	9450743	between_species_paralog	6	4	IPR000047	HTH_lambrepressr
LOC_Os05g25260	14605322	14607214	AT4G23750	12376194	12378024	ortholog_many2many	3	2	IPR001471	TF_ERF_DNA-bd
LOC_Os05g07720	4152882	4155872	AT4G24670	12727834	12731274	ortholog_many2many	3	2	IPR006948	Alliinase_C
LOC_Os05g32890	19199064	19203080	AT4G31920	15444117	15446959	between_species_paralog	7	3	IPR006447	SHAQKYF_myb_bd
LOC_Os05g51610	29526001	29531196	AT5G01490	195541	198524	ortholog_many2many	4	3	IPR004713	CaH_exchang
LOC_Os05g02390	783027	784079	AT5G04340	1216131	1217106	between_species_paralog	3	2	IPR015880	Znf_C2H2-like
LOC_Os05g38600	22575937	22576461	AT5G04340	1216131	1217106	between_species_paralog	4	2	IPR015880	Znf_C2H2-like
LOC_Os05g38620	22585858	22586478	AT5G04340	1216131	1217106	between_species_paralog	3	2	IPR015880	Znf_C2H2-like
LOC_Os05g01600	354130	356637	AT5G09810	3052097	3054614	between_species_paralog	3	1	IPR004000	Actin-like
LOC_Os05g36290	21438011	21441689	AT5G09810	3052097	3054614	between_species_paralog	3	1	IPR004000	Actin-like
LOC_Os05g32070	18631300	18632636	AT5G12330	3987375	3989833	ortholog_many2many	5	3	IPR006511	LRP1_C
LOC_Os05g45230	26194315	26195173	AT5G13080	4149740	4151150	between_species_paralog	3	1	IPR003657	WRKY_DNA_bd
LOC_Os05g49100	28092048	28095344	AT5G13080	4149740	4151150	between_species_paralog	3	1	IPR003657	WRKY_DNA_bd
LOC_Os05g50610	28946491	28950527	AT5G13080	4149740	4151150	between_species_paralog	3	1	IPR003657	WRKY_DNA_bd
LOC_Os05g23720	13553095	13556987	AT5G17400	5728789	5730376	between_species_paralog	5	4	IPR001993	Mitochondria_substrate_carrier
LOC_Os05g50800	29074818	29077750	AT5G24310	8273546	8276526	between_species_paralog	1	0
LOC_Os05g06340	3245180	3247479	AT5G26930	9479466	9480200	ortholog_many2many	3	1	IPR000679	Znf_GATA
LOC_Os05g49280	28209177	28210205	AT5G26930	9479466	9480200	between_species_paralog	2	1	IPR000679	Znf_GATA
LOC_Os05g50270	28754960	28756226	AT5G26930	9479466	9480200	between_species_paralog	3	1	IPR000679	Znf_GATA
LOC_Os05g45410	26281777	26284252	AT5G45710	18540850	18542863	ortholog_many2many	2	1	IPR000232	HSF_DNA_bd
LOC_Os05g11130	6267845	6273013	AT5G48000	19444138	19447850	between_species_paralog	7	2	IPR001128	Cyt_P450
LOC_Os05g14800	8407245	8415908	AT5G48010	19456960	19461689	between_species_paralog	5	2	IPR008930	Terpenoid_cyclase/PrenylTrfase
LOC_Os05g07060	3715739	3716868	AT5G55730	22558148	22560461	between_species_paralog	3	1	IPR000782	FAS1_domain
LOC_Os05g38500	22524615	22526317	AT5G55730	22558148	22560461	between_species_paralog	2	1	IPR000782	FAS1_domain
LOC_Os05g48890	27984690	27985698	AT5G55730	22558148	22560461	between_species_paralog	3	1	IPR000782	FAS1_domain
LOC_Os05g48900	27989048	27990300	AT5G55730	22558148	22560461	between_species_paralog	3	1	IPR000782	FAS1_domain
LOC_Os05g35050	20741459	20742339	AT5G59030	23833728	23834511	ortholog_many2many	2	1	IPR007274	Cop_transporter
LOC_Os05g02150	658106	660255	AT5G60200	24240975	24242523	between_species_paralog	2	1	IPR003851	Znf_Dof
LOC_Os05g36900	21492995	21493978	AT5G60200	24240975	24242523	between_species_paralog	4	1	IPR003851	Znf_Dof
LOC_Os05g19570	11393044	11394830	AT1G12560	4276519	4277899	between_species_paralog	7	5	IPR005132	RlpA
LOC_Os05g19600	11418057	11419529	AT1G12560	4276519	4277899	between_species_paralog	7	5	IPR005132	RlpA
LOC_Os05g39990	23433027	23434993	AT1G12560	4276519	4277899	between_species_paralog	8	5	IPR005132	RlpA
LOC_Os05g27540	15968781	15970314	AT1G13980	4788463	4794654	between_species_paralog	3	0
LOC_Os05g13580	7533575	7534605	AT1G24620	8723712	8724459	between_species_paralog	6	3	IPR002048	EF_hand_Ca_bd
LOC_Os05g31620	18345966	18346944	AT1G24620	8723712	8724459	between_species_paralog	6	3	IPR002048	EF_hand_Ca_bd
LOC_Os05g01600	354130	356637	AT1G49240	18215872	18218313	between_species_paralog	3	1	IPR004000	Actin-like
LOC_Os05g36290	21438011	21441689	AT1G49240	18215872	18218313	between_species_paralog	3	1	IPR004000	Actin-like
LOC_Os05g38000	22230938	22234648	AT1G52240	19455766	19459586	between_species_paralog	3	1	IPR005512	Rop_nucl_exchang_PRONE
LOC_Os05g48640	27817366	27820289	AT1G52240	19455766	19459586	ortholog_many2many	3	1	IPR005512	Rop_nucl_exchang_PRONE
LOC_Os05g35380	20944124	20947135	AT2G03720	1132170	1133379	between_species_paralog	2	1	IPR006016	UspA
LOC_Os05g35410	20976852	20980795	AT2G26650	11331850	11336607	between_species_paralog	8	5	IPR000595	cNMP_bd
LOC_Os05g01600	354130	356637	AT2G37620	15779174	15781561	between_species_paralog	3	1	IPR004000	Actin-like
LOC_Os05g36290	21438011	21441689	AT2G37620	15779174	15781561	between_species_paralog	3	1	IPR004000	Actin-like
LOC_Os05g37470	21864241	21869515	AT2G38120	15972993	15977180	ortholog_many2many	3	1	IPR013057	AA_transpt_TM
LOC_Os05g38000	22230938	22234648	AT2G45890	18883473	18885566	between_species_paralog	2	1	IPR005512	Rop_nucl_exchang_PRONE
LOC_Os05g48640	27817366	27820289	AT2G45890	18883473	18885566	between_species_paralog	2	1	IPR005512	Rop_nucl_exchang_PRONE
LOC_Os05g47500	27149269	27154923	AT2G47000	19309868	19315241	between_species_paralog	7	3	IPR003439	ABC_transporter-like
LOC_Os05g41010	23978390	23981326	AT3G06300	1907582	1909804	ortholog_one2many	4	3	IPR006620	Pro_4_hyd_alph
LOC_Os05g01600	354130	356637	AT3G18780	6474842	6477204	between_species_paralog	3	1	IPR004000	Actin-like
LOC_Os05g36290	21438011	21441689	AT3G18780	6474842	6477204	between_species_paralog	3	1	IPR004000	Actin-like
LOC_Os05g07120	3756453	3759766	AT3G25710	9369519	9371394	between_species_paralog	4	2	IPR001092	HLH_basic
LOC_Os05g01810	486053	488406	AT3G43960	15774055	15775657	between_species_paralog	4	2	IPR013201	Prot_inhib_I29
LOC_Os05g43230	25091323	25095076	AT3G43960	15774055	15775657	between_species_paralog	5	2	IPR013201	Prot_inhib_I29
LOC_Os05g06450	3307904	3312592	AT3G61650	22812601	22815011	ortholog_one2many	12	9	IPR002454	Gamma_tubulin
LOC_Os05g45300	26223128	26225793	AT4G14430	8304600	8305705	ortholog_many2many	2	1	IPR001753	Crotonase_core
LOC_Os05g01490	287362	290707	AT4G17530	9773548	9775607	between_species_paralog	11	9	IPR002041	Ran_GTPase
LOC_Os05g28520	16641724	16644874	AT4G18640	10259678	10263764	between_species_paralog	8	3	IPR002290	Ser_thr_pkinase
LOC_Os05g39410	23050083	23054720	AT4G18640	10259678	10263764	between_species_paralog	9	5	IPR002290	Ser_thr_pkinase
LOC_Os05g48660	27823965	27826868	AT4G18640	10259678	10263764	between_species_paralog	8	3	IPR002290	Ser_thr_pkinase
LOC_Os05g06110	3050752	3057002	AT4G30160	14753349	14760189	between_species_paralog	4	2	IPR007122	Gelsolin
LOC_Os05g46720	26980674	26985924	AT4G34580	16515327	16519534	between_species_paralog	5	4	IPR001071	CRAL_bd_toc_tran
LOC_Os05g06450	3307904	3312592	AT5G05620	1679244	1681719	ortholog_one2many	12	9	IPR002454	Gamma_tubulin
LOC_Os05g01600	354130	356637	AT5G09810	3052097	3054614	between_species_paralog	3	1	IPR004000	Actin-like
LOC_Os05g36290	21438011	21441689	AT5G09810	3052097	3054614	between_species_paralog	3	1	IPR004000	Actin-like
LOC_Os05g46030	26623337	26642116	AT5G20490	6926623	6937506	ortholog_one2many	10	5	IPR004009	Myosin_N
LOC_Os05g46030	26623337	26642116	AT5G43900	17656894	17667451	between_species_paralog	8	5	IPR004009	Myosin_N
LOC_Os05g02350	759008	763788	AT5G65090	26004017	26006851	between_species_paralog	3	2	IPR005135	Endo/exonuclease/phosphatase
LOC_Os05g41000	23971030	23976491	AT5G65090	26004017	26006851	between_species_paralog	3	2	IPR005135	Endo/exonuclease/phosphatase
LOC_Os05g45900	26533504	26538632	AT5G65090	26004017	26006851	between_species_paralog	4	2	IPR005135	Endo/exonuclease/phosphatase
LOC_Os06g12290	6611662	6612441	AT1G10370	3397081	3398358	ortholog_many2many	5	3	IPR004045	Glutathione_S-Trfase_N
LOC_Os06g01860	483710	484309	AT1G13260	4542168	4543742	between_species_paralog	4	1	IPR003340	TF_B3
LOC_Os06g09660	4925493	4931178	AT1G19220	6628068	6633087	ortholog_one2many	4	2	IPR003340	TF_B3
LOC_Os06g48950	29655971	29664197	AT1G19220	6628068	6633087	between_species_paralog	5	2	IPR003340	TF_B3
LOC_Os06g05050	2228207	2232268	AT1G21210	7424106	7427041	ortholog_many2many	14	6	IPR002290	Ser_thr_pkinase
LOC_Os06g07330	3514131	3517029	AT1G21210	7424106	7427041	ortholog_many2many	14	5	IPR002290	Ser_thr_pkinase
LOC_Os06g49170	29790165	29794255	AT1G21210	7424106	7427041	ortholog_many2many	15	7	IPR002290	Ser_thr_pkinase
LOC_Os06g49260	29849304	29854923	AT1G21210	7424106	7427041	ortholog_many2many	13	6	IPR002290	Ser_thr_pkinase
LOC_Os06g13860	7697402	7702821	AT1G32230	11612118	11616218	between_species_paralog	4	1	IPR012317	PARP_catalytic
LOC_Os06g06350	2948765	2956843	AT1G49430	18291043	18295825	between_species_paralog	3	2	IPR000873	AMP-dep_Synth/Lig
LOC_Os06g04420	1892930	1893307	AT1G55020	20525708	20530273	ortholog_many2many	5	1	IPR013819	LipOase_C
LOC_Os06g46270	28036571	28040911	AT1G56010	20946571	20949281	ortholog_many2many	2	1	IPR003441	NAM
LOC_Os06g40700	24257630	24262791	AT2G04160	1401268	1407745	ortholog_many2many	6	3	IPR000209	Peptidase_S8/S53
LOC_Os06g11330	5951600	5962310	AT2G14210	6018558	6023863	between_species_paralog	3	2	IPR002100	TF_MADSbox
LOC_Os06g23950	13995415	13996320	AT2G14210	6018558	6023863	between_species_paralog	3	1	IPR002100	TF_MADSbox
LOC_Os06g23980	14005454	14008299	AT2G14210	6018558	6023863	between_species_paralog	3	1	IPR002487	TF_Kbox
LOC_Os06g08480	4166230	4182941	AT2G25170	10713807	10723986	ortholog_one2many	15	8	IPR009463	DUF1087
LOC_Os06g13860	7697402	7702821	AT2G35510	14916723	14920377	between_species_paralog	3	1	IPR012317	PARP_catalytic
LOC_Os06g23650	13803018	13804816	AT3G15170	5109883	5111447	ortholog_one2many	3	1	IPR003441	NAM
LOC_Os06g04420	1892930	1893307	AT3G22400	7926879	7931351	ortholog_many2many	5	1	IPR013819	LipOase_C
LOC_Os06g14010	7791173	7791682	AT3G50060	18557970	18559106	between_species_paralog	5	3	IPR001005	SANT_DNA-bd
LOC_Os06g14700	8271684	8272220	AT3G50060	18557970	18559106	between_species_paralog	5	3	IPR001005	SANT_DNA-bd
LOC_Os06g14710	8282028	8282506	AT3G50060	18557970	18559106	between_species_paralog	5	3	IPR001005	SANT_DNA-bd
LOC_Os06g43090	25898445	25899820	AT3G50060	18557970	18559106	ortholog_many2many	5	3	IPR001005	SANT_DNA-bd
LOC_Os06g05830	2659851	2662465	AT3G59420	21959647	21963041	between_species_paralog	11	4	IPR002290	Ser_thr_pkinase
LOC_Os06g01580	343157	343507	AT4G12550	7439115	7439805	ortholog_many2many	3	2	IPR016140	Bifunc_inhib/LTP/seed_store
LOC_Os06g07220	3454734	3455812	AT4G12550	7439115	7439805	between_species_paralog	6	2	IPR016140	Bifunc_inhib/LTP/seed_store
LOC_Os06g43600	26226107	26227763	AT4G12550	7439115	7439805	between_species_paralog	4	2	IPR016140	Bifunc_inhib/LTP/seed_store
LOC_Os06g22870	13344334	13348183	AT4G14550	8347822	8350019	between_species_paralog	3	1	IPR003311	AUX_IAA
LOC_Os06g24850	14578529	14579060	AT4G14550	8347822	8350019	between_species_paralog	3	1	IPR003311	AUX_IAA
LOC_Os06g39590	23500976	23502506	AT4G14550	8347822	8350019	between_species_paralog	3	1	IPR003311	AUX_IAA
LOC_Os06g35730	20850111	20852752	AT4G18730	10302163	10303382	ortholog_many2many	3	1	IPR002132	Ribosomal_L5
LOC_Os06g15550	8820963	8822144	AT4G33495	16110712	16112597	between_species_paralog	2	1	IPR001578	Peptidase_C12
LOC_Os06g14450	8115250	8118851	AT5G03540	889566	894167	between_species_paralog	2	1	IPR004140	Exo70
LOC_Os06g09660	4925493	4931178	AT5G20730	7016445	7022113	ortholog_one2many	5	2	IPR003340	TF_B3
LOC_Os06g48950	29655971	29664197	AT5G20730	7016445	7022113	between_species_paralog	5	3	IPR000354	Involucrin_rpt
LOC_Os06g22870	13344334	13348183	AT5G25890	9033415	9034834	between_species_paralog	3	1	IPR003311	AUX_IAA
LOC_Os06g24850	14578529	14579060	AT5G25890	9033415	9034834	between_species_paralog	3	1	IPR003311	AUX_IAA
LOC_Os06g39590	23500976	23502506	AT5G25890	9033415	9034834	between_species_paralog	3	1	IPR003311	AUX_IAA
LOC_Os06g37450	22154056	22156064	AT5G26930	9479466	9480200	between_species_paralog	2	1	IPR000679	Znf_GATA
LOC_Os06g35960	20995267	20997870	AT5G45710	18540850	18542863	between_species_paralog	3	1	IPR000232	HSF_DNA_bd
LOC_Os06g36930	21760307	21761424	AT5G45710	18540850	18542863	between_species_paralog	3	1	IPR000232	HSF_DNA_bd
LOC_Os06g03800	1519744	1525082	AT5G57740	23394585	23397650	between_species_paralog	6	2	IPR001841	Znf_RING
LOC_Os06g45590	27600122	27604339	AT1G16300	5574310	5577622	ortholog_many2many	7	1	IPR006424	Glyceraldehyde-3-P_DH_1
LOC_Os06g45590	27600122	27604339	AT1G79530	29915902	29919234	ortholog_many2many	7	1	IPR006424	Glyceraldehyde-3-P_DH_1
LOC_Os06g22919	13374504	13389471	AT2G18800	8144912	8146265	between_species_paralog	7	4	IPR016455	XET
LOC_Os06g48160	29132003	29133773	AT2G18800	8144912	8146265	ortholog_many2many	7	5	IPR016455	XET
LOC_Os06g48170	29136239	29138252	AT2G18800	8144912	8146265	between_species_paralog	7	5	IPR016455	XET
LOC_Os06g48180	29143890	29145564	AT2G18800	8144912	8146265	between_species_paralog	7	5	IPR016455	XET
LOC_Os06g48200	29155427	29156885	AT2G18800	8144912	8146265	ortholog_many2many	8	5	IPR016455	XET
LOC_Os06g08440	4136249	4141664	AT2G25180	10724301	10726961	ortholog_many2many	7	6	IPR017053	Response_reg_B-typ_pln
LOC_Os06g43910	26449764	26453699	AT2G25180	10724301	10726961	between_species_paralog	7	5	IPR006447	SHAQKYF_myb_bd
LOC_Os06g08440	4136249	4141664	AT3G16857	5755821	5759443	between_species_paralog	7	6	IPR017053	Response_reg_B-typ_pln
LOC_Os06g43910	26449764	26453699	AT3G16857	5755821	5759443	between_species_paralog	7	5	IPR006447	SHAQKYF_myb_bd
LOC_Os06g08440	4136249	4141664	AT4G31920	15444117	15446959	ortholog_many2many	7	6	IPR017053	Response_reg_B-typ_pln
LOC_Os06g43910	26449764	26453699	AT4G31920	15444117	15446959	between_species_paralog	7	5	IPR006447	SHAQKYF_myb_bd
LOC_Os06g51070	30892479	30893525	AT1G26870	9312856	9314983	between_species_paralog	3	1	IPR003441	NAM
LOC_Os06g01480	288311	293071	AT1G33280	12072741	12073839	between_species_paralog	2	1	IPR003441	NAM
LOC_Os06g04090	1698372	1701860	AT1G33280	12072741	12073839	between_species_paralog	3	1	IPR003441	NAM
LOC_Os06g33940	19742868	19745460	AT1G33280	12072741	12073839	between_species_paralog	2	1	IPR003441	NAM
LOC_Os06g01480	288311	293071	AT1G79580	29940850	29943602	between_species_paralog	2	1	IPR003441	NAM
LOC_Os06g04090	1698372	1701860	AT1G79580	29940850	29943602	between_species_paralog	3	1	IPR003441	NAM
LOC_Os06g33940	19742868	19745460	AT1G79580	29940850	29943602	ortholog_one2many	2	1	IPR003441	NAM
LOC_Os06g41750	25023629	25033554	AT2G20000	8632078	8637300	ortholog_one2one	5	3	IPR001440	TPR-1
LOC_Os06g47150	28585447	28589360	AT2G28350	12114331	12116848	ortholog_one2many	4	2	IPR003340	TF_B3
LOC_Os06g05830	2659851	2662465	AT3G59420	21959647	21963041	between_species_paralog	11	4	IPR002290	Ser_thr_pkinase
LOC_Os06g01480	288311	293071	AT4G10350	6415256	6416829	between_species_paralog	2	1	IPR003441	NAM
LOC_Os06g04090	1698372	1701860	AT4G10350	6415256	6416829	between_species_paralog	3	1	IPR003441	NAM
LOC_Os06g33940	19742868	19745460	AT4G10350	6415256	6416829	between_species_paralog	2	1	IPR003441	NAM
LOC_Os06g47150	28585447	28589360	AT4G30080	14703201	14706336	ortholog_one2many	4	2	IPR003340	TF_B3
LOC_Os06g04560	1972530	1982164	AT1G01950	325379	330619	ortholog_one2many	5	3	IPR000225	Armadillo
LOC_Os06g22870	13344334	13348183	AT1G04550	1240375	1242121	between_species_paralog	3	1	IPR003311	AUX_IAA
LOC_Os06g24850	14578529	14579060	AT1G04550	1240375	1242121	between_species_paralog	3	1	IPR003311	AUX_IAA
LOC_Os06g39590	23500976	23502506	AT1G04550	1240375	1242121	between_species_paralog	3	1	IPR003311	AUX_IAA
LOC_Os06g12290	6611662	6612441	AT1G10370	3397081	3398358	ortholog_many2many	5	3	IPR004045	Glutathione_S-Trfase_N
LOC_Os06g01860	483710	484309	AT1G13260	4542168	4543742	between_species_paralog	4	1	IPR003340	TF_B3
LOC_Os06g40960	24452134	24455498	AT1G13290	4550153	4551620	between_species_paralog	7	2	IPR015880	Znf_C2H2-like
LOC_Os06g45590	27600122	27604339	AT1G16300	5574310	5577622	ortholog_many2many	7	1	IPR006424	Glyceraldehyde-3-P_DH_1
LOC_Os06g44380	26784111	26791029	AT1G17110	5845660	5850934	between_species_paralog	5	2	IPR002893	Znf_MYND
LOC_Os06g09660	4925493	4931178	AT1G19220	6628068	6633087	ortholog_one2many	4	2	IPR003340	TF_B3
LOC_Os06g48950	29655971	29664197	AT1G19220	6628068	6633087	between_species_paralog	5	2	IPR003340	TF_B3
LOC_Os06g09660	4925493	4931178	AT1G19850	6886879	6891374	between_species_paralog	5	2	IPR003340	TF_B3
LOC_Os06g48950	29655971	29664197	AT1G19850	6886879	6891374	between_species_paralog	6	2	IPR003340	TF_B3
LOC_Os06g05050	2228207	2232268	AT1G21210	7424106	7427041	ortholog_many2many	14	6	IPR002290	Ser_thr_pkinase
LOC_Os06g07330	3514131	3517029	AT1G21210	7424106	7427041	ortholog_many2many	14	5	IPR002290	Ser_thr_pkinase
LOC_Os06g49170	29790165	29794255	AT1G21210	7424106	7427041	ortholog_many2many	15	7	IPR002290	Ser_thr_pkinase
LOC_Os06g49260	29849304	29854923	AT1G21210	7424106	7427041	ortholog_many2many	13	6	IPR002290	Ser_thr_pkinase
LOC_Os06g12610	6865394	6868522	AT1G23080	8180577	8183570	between_species_paralog	3	2	IPR014024	Auxin_eff_sub
LOC_Os06g44970	27199809	27203765	AT1G23080	8180577	8183570	between_species_paralog	3	2	IPR014024	Auxin_eff_sub
LOC_Os06g02130	633143	639480	AT1G31930	11464985	11469185	ortholog_one2many	4	2	IPR001019	Gprotein_alph_bd
LOC_Os06g39640	23539785	23546202	AT1G48410	17885633	17892596	between_species_paralog	5	4	IPR014811	DUF1785
LOC_Os06g51310	31068078	31076483	AT1G48410	17885633	17892596	ortholog_one2many	5	4	IPR014811	DUF1785
LOC_Os06g44750	27024440	27028342	AT1G51190	18977284	18980618	between_species_paralog	3	2	IPR001471	TF_ERF_DNA-bd
LOC_Os06g03530	1362000	1366576	AT1G53330	19896027	19897442	between_species_paralog	2	1	IPR002885	Pentatricopeptide_repeat
LOC_Os06g04420	1892930	1893307	AT1G55020	20525708	20530273	ortholog_many2many	5	1	IPR013819	LipOase_C
LOC_Os06g46270	28036571	28040911	AT1G56010	20946571	20949281	ortholog_many2many	2	1	IPR003441	NAM
LOC_Os06g29380	16792636	16798778	AT1G59820	22011328	22020294	between_species_paralog	6	3	IPR008250	ATPase_P-typ_ATPase-assoc-reg
LOC_Os06g36990	21808431	21814011	AT1G59820	22011328	22020294	between_species_paralog	6	3	IPR008250	ATPase_P-typ_ATPase-assoc-reg
LOC_Os06g12610	6865394	6868522	AT1G70940	26743054	26746395	between_species_paralog	3	2	IPR014024	Auxin_eff_sub
LOC_Os06g44970	27199809	27203765	AT1G70940	26743054	26746395	between_species_paralog	3	2	IPR014024	Auxin_eff_sub
LOC_Os06g01890	493851	510407	AT1G71692	26952645	26955127	between_species_paralog	3	2	IPR002100	TF_MADSbox
LOC_Os06g06750	3161802	3168416	AT1G71692	26952645	26955127	between_species_paralog	4	2	IPR002100	TF_MADSbox
LOC_Os06g12610	6865394	6868522	AT1G73590	27659673	27663178	ortholog_one2many	3	2	IPR014024	Auxin_eff_sub
LOC_Os06g44970	27199809	27203765	AT1G73590	27659673	27663178	between_species_paralog	3	2	IPR014024	Auxin_eff_sub
LOC_Os06g12210	6555803	6556320	AT1G74500	27998175	27998821	between_species_paralog	3	2	IPR001092	HLH_basic
LOC_Os06g47150	28585447	28589360	AT1G77850	29272313	29275419	between_species_paralog	3	2	IPR003340	TF_B3
LOC_Os06g47294	28662487	28666857	AT1G78240	29432829	29436571	between_species_paralog	3	1	IPR004159	DUF248_MeTrfase
LOC_Os06g45590	27600122	27604339	AT1G79530	29915902	29919234	ortholog_many2many	7	1	IPR006424	Glyceraldehyde-3-P_DH_1
LOC_Os06g12610	6865394	6868522	AT2G01420	180105	183328	between_species_paralog	3	2	IPR014024	Auxin_eff_sub
LOC_Os06g44970	27199809	27203765	AT2G01420	180105	183328	between_species_paralog	3	2	IPR014024	Auxin_eff_sub
LOC_Os06g11330	5951600	5962310	AT2G14210	6018558	6023863	between_species_paralog	3	2	IPR002100	TF_MADSbox
LOC_Os06g23950	13995415	13996320	AT2G14210	6018558	6023863	between_species_paralog	3	1	IPR002100	TF_MADSbox
LOC_Os06g23980	14005454	14008299	AT2G14210	6018558	6023863	between_species_paralog	3	1	IPR002487	TF_Kbox
LOC_Os06g34970	20336991	20337407	AT2G17780	7724885	7727404	ortholog_many2many	2	0
LOC_Os06g47470	28751551	28756412	AT2G17780	7724885	7727404	ortholog_many2many	8	0
LOC_Os06g47530	28768507	28773433	AT2G17780	7724885	7727404	ortholog_many2many	8	0
LOC_Os06g29080	16578009	16582088	AT2G18470	8005285	8008052	between_species_paralog	11	4	IPR002290	Ser_thr_pkinase
LOC_Os06g29340	16761446	16769687	AT2G18470	8005285	8008052	between_species_paralog	12	4	IPR002290	Ser_thr_pkinase
LOC_Os06g22919	13374504	13389471	AT2G18800	8144912	8146265	between_species_paralog	7	4	IPR016455	XET
LOC_Os06g48160	29132003	29133773	AT2G18800	8144912	8146265	ortholog_many2many	7	5	IPR016455	XET
LOC_Os06g48170	29136239	29138252	AT2G18800	8144912	8146265	between_species_paralog	7	5	IPR016455	XET
LOC_Os06g48180	29143890	29145564	AT2G18800	8144912	8146265	between_species_paralog	7	5	IPR016455	XET
LOC_Os06g48200	29155427	29156885	AT2G18800	8144912	8146265	ortholog_many2many	8	5	IPR016455	XET
LOC_Os06g41750	25023629	25033554	AT2G20000	8632078	8637300	ortholog_one2one	5	3	IPR001440	TPR-1
LOC_Os06g23684	13834594	13843082	AT2G20610	8877960	8880388	possible_ortholog	7	4	IPR001176	ACC_synthase
LOC_Os06g08480	4166230	4182941	AT2G25170	10713807	10723986	ortholog_one2many	15	8	IPR009463	DUF1087
LOC_Os06g08440	4136249	4141664	AT2G25180	10724301	10726961	ortholog_many2many	7	6	IPR017053	Response_reg_B-typ_pln
LOC_Os06g43910	26449764	26453699	AT2G25180	10724301	10726961	between_species_paralog	7	5	IPR006447	SHAQKYF_myb_bd
LOC_Os06g06090	2805544	2812005	AT2G43790	18138307	18140988	ortholog_one2many	13	7	IPR008351	JNK_MAPK
LOC_Os06g07040	3341424	3345319	AT2G46990	19307855	19308990	between_species_paralog	3	1	IPR003311	AUX_IAA
LOC_Os06g23650	13803018	13804816	AT3G15170	5109883	5111447	ortholog_one2many	3	1	IPR003441	NAM
LOC_Os06g08440	4136249	4141664	AT3G16857	5755821	5759443	between_species_paralog	7	6	IPR017053	Response_reg_B-typ_pln
LOC_Os06g43910	26449764	26453699	AT3G16857	5755821	5759443	between_species_paralog	7	5	IPR006447	SHAQKYF_myb_bd
LOC_Os06g07040	3341424	3345319	AT3G17600	6020025	6021142	between_species_paralog	3	1	IPR003311	AUX_IAA
LOC_Os06g44750	27024440	27028342	AT3G20840	7300675	7303693	between_species_paralog	3	2	IPR001471	TF_ERF_DNA-bd
LOC_Os06g04420	1892930	1893307	AT3G22400	7926879	7931351	ortholog_many2many	5	1	IPR013819	LipOase_C
LOC_Os06g14010	7791173	7791682	AT3G50060	18557970	18559106	between_species_paralog	5	3	IPR001005	SANT_DNA-bd
LOC_Os06g14700	8271684	8272220	AT3G50060	18557970	18559106	between_species_paralog	5	3	IPR001005	SANT_DNA-bd
LOC_Os06g14710	8282028	8282506	AT3G50060	18557970	18559106	between_species_paralog	5	3	IPR001005	SANT_DNA-bd
LOC_Os06g43090	25898445	25899820	AT3G50060	18557970	18559106	ortholog_many2many	5	3	IPR001005	SANT_DNA-bd
LOC_Os06g24460	14331375	14331900	AT3G53480	19825307	19831797	possible_ortholog	5	0
LOC_Os06g36090	21112222	21119651	AT3G53480	19825307	19831797	possible_ortholog	5	4	IPR003439	ABC_transporter-like
LOC_Os06g07040	3341424	3345319	AT3G62100	22995791	22996761	between_species_paralog	3	1	IPR003311	AUX_IAA
LOC_Os06g10600	5498343	5501412	AT4G00730	299359	304508	between_species_paralog	8	3	IPR001356	Homeobox
LOC_Os06g50510	30573839	30582597	AT4G00730	299359	304508	between_species_paralog	5	1	IPR002913	START_lipid_bd
LOC_Os06g50560	30605146	30611938	AT4G00730	299359	304508	between_species_paralog	5	1	IPR002913	START_lipid_bd
LOC_Os06g50679	30669851	30676152	AT4G00730	299359	304508	possible_ortholog	5	0
LOC_Os06g50724	30687277	30690821	AT4G00730	299359	304508	between_species_paralog	5	1	IPR002913	START_lipid_bd
LOC_Os06g04850	2122399	2123788	AT4G16780	9449114	9450743	between_species_paralog	8	4	IPR000047	HTH_lambrepressr
LOC_Os06g04870	2136451	2138102	AT4G16780	9449114	9450743	between_species_paralog	9	4	IPR000047	HTH_lambrepressr
LOC_Os06g48290	29197272	29198358	AT4G16780	9449114	9450743	between_species_paralog	8	4	IPR000047	HTH_lambrepressr
LOC_Os06g06540	3066710	3067738	AT4G23750	12376194	12378024	ortholog_many2many	3	2	IPR001471	TF_ERF_DNA-bd
LOC_Os06g40370	24037929	24043794	AT4G24400	12617256	12620684	between_species_paralog	10	5	IPR002290	Ser_thr_pkinase
LOC_Os06g44380	26784111	26791029	AT4G24560	12679210	12684939	between_species_paralog	5	2	IPR002893	Znf_MYND
LOC_Os06g08440	4136249	4141664	AT4G31920	15444117	15446959	ortholog_many2many	7	6	IPR017053	Response_reg_B-typ_pln
LOC_Os06g43910	26449764	26453699	AT4G31920	15444117	15446959	between_species_paralog	7	5	IPR006447	SHAQKYF_myb_bd
LOC_Os06g14450	8115250	8118851	AT5G03540	889566	894167	between_species_paralog	2	1	IPR004140	Exo70
LOC_Os06g12590	6821980	6831863	AT5G03730	974498	979849	between_species_paralog	13	4	IPR002290	Ser_thr_pkinase
LOC_Os06g44750	27024440	27028342	AT5G10510	3315529	3320202	between_species_paralog	3	2	IPR001471	TF_ERF_DNA-bd
LOC_Os06g44410	26806864	26812603	AT5G10720	3385901	3390686	ortholog_one2many	7	5	IPR003594	ATP_bd_ATPase
LOC_Os06g49830	30160501	30161655	AT5G12330	3987375	3989833	between_species_paralog	8	3	IPR006511	LRP1_C
LOC_Os06g09660	4925493	4931178	AT5G20730	7016445	7022113	ortholog_one2many	5	2	IPR003340	TF_B3
LOC_Os06g48950	29655971	29664197	AT5G20730	7016445	7022113	between_species_paralog	5	3	IPR000354	Involucrin_rpt
LOC_Os06g37450	22154056	22156064	AT5G26930	9479466	9480200	between_species_paralog	2	1	IPR000679	Znf_GATA
LOC_Os06g35960	20995267	20997870	AT5G45710	18540850	18542863	between_species_paralog	3	1	IPR000232	HSF_DNA_bd
LOC_Os06g36930	21760307	21761424	AT5G45710	18540850	18542863	between_species_paralog	3	1	IPR000232	HSF_DNA_bd
LOC_Os06g01250	162205	164539	AT5G47990	19434827	19436689	ortholog_many2many	6	3	IPR001128	Cyt_P450
LOC_Os06g24180	14149817	14152225	AT5G47990	19434827	19436689	between_species_paralog	6	3	IPR001128	Cyt_P450
LOC_Os06g41070	24530829	24532801	AT5G47990	19434827	19436689	ortholog_many2many	6	3	IPR001128	Cyt_P450
LOC_Os06g28820	16399701	16431412	AT5G48010	19456960	19461689	between_species_paralog	4	1	IPR008930	Terpenoid_cyclase/PrenylTrfase
LOC_Os06g17460	10130034	10130805	AT5G55730	22558148	22560461	ortholog_many2many	2	1	IPR000782	FAS1_domain
LOC_Os06g44660	26956539	26957614	AT5G55730	22558148	22560461	between_species_paralog	3	1	IPR000782	FAS1_domain
LOC_Os06g44750	27024440	27028342	AT5G57390	23253459	23256450	ortholog_one2many	3	2	IPR001471	TF_ERF_DNA-bd
LOC_Os06g03770	1491884	1501598	AT5G58270	23562142	23567190	ortholog_one2many	8	3	IPR003439	ABC_transporter-like
LOC_Os06g49470	29970001	29972197	AT5G58710	23717775	23719765	ortholog_many2many	4	3	IPR015891	Cyclophilin-like
LOC_Os06g49480	29972847	29975324	AT5G58710	23717775	23719765	ortholog_many2many	4	3	IPR015891	Cyclophilin-like
LOC_Os06g17410	10100313	10101740	AT5G60200	24240975	24242523	between_species_paralog	3	1	IPR003851	Znf_Dof
LOC_Os06g01920	510856	511805	AT1G12560	4276519	4277899	ortholog_many2many	7	5	IPR005132	RlpA
LOC_Os06g51380	31117749	31120615	AT1G48380	17877413	17879270	ortholog_one2many	1	0
LOC_Os06g30090	17348127	17349156	AT1G66470	24795214	24796988	ortholog_many2many	3	2	IPR001092	HLH_basic
LOC_Os06g12610	6865394	6868522	AT1G70940	26743054	26746395	between_species_paralog	3	2	IPR014024	Auxin_eff_sub
LOC_Os06g44970	27199809	27203765	AT1G70940	26743054	26746395	between_species_paralog	3	2	IPR014024	Auxin_eff_sub
LOC_Os06g11430	6031411	6034430	AT2G22475	9541401	9545010	ortholog_many2many	4	1	IPR004182	GRAM
LOC_Os06g08500	4191208	4193417	AT2G24260	10319334	10322222	ortholog_many2many	3	2	IPR001092	HLH_basic
LOC_Os06g09370	4708744	4714553	AT2G24260	10319334	10322222	between_species_paralog	3	2	IPR001092	HLH_basic
LOC_Os06g14030	7798074	7805572	AT2G26650	11331850	11336607	between_species_paralog	8	6	IPR000595	cNMP_bd
LOC_Os06g14310	7981085	7982860	AT2G26650	11331850	11336607	between_species_paralog	9	5	IPR000595	cNMP_bd
LOC_Os06g01620	364301	366066	AT2G45160	18617862	18620150	ortholog_many2many	2	1	IPR005202	GRAS
LOC_Os06g38450	22778412	22780112	AT3G43960	15774055	15775657	between_species_paralog	4	2	IPR013201	Prot_inhib_I29
LOC_Os06g01620	364301	366066	AT3G60630	22410365	22412608	ortholog_many2many	2	1	IPR005202	GRAS
LOC_Os06g05690	2573178	2575723	AT3G61440	22735663	22738126	between_species_paralog	6	3	IPR005856	Cys_synthKM
LOC_Os06g05700	2578089	2580727	AT3G61440	22735663	22738126	between_species_paralog	5	3	IPR005856	Cys_synthKM
LOC_Os06g36820	21691503	21691822	AT3G61440	22735663	22738126	between_species_paralog	5	1	IPR001926	PyrdxlP-dep_enz_bsu
LOC_Os06g36830	21694605	21698564	AT3G61440	22735663	22738126	between_species_paralog	5	1	IPR001926	PyrdxlP-dep_enz_bsu
LOC_Os06g36840	21699481	21702433	AT3G61440	22735663	22738126	between_species_paralog	5	3	IPR005856	Cys_synthKM
LOC_Os06g36850	21707954	21713109	AT3G61440	22735663	22738126	between_species_paralog	5	1	IPR001926	PyrdxlP-dep_enz_bsu
LOC_Os06g36880	21729405	21732640	AT3G61440	22735663	22738126	between_species_paralog	5	3	IPR005856	Cys_synthKM
LOC_Os06g01620	364301	366066	AT4G00150	57199	59286	ortholog_many2many	2	1	IPR005202	GRAS
LOC_Os06g10600	5498343	5501412	AT4G00730	299359	304508	between_species_paralog	8	3	IPR001356	Homeobox
LOC_Os06g50510	30573839	30582597	AT4G00730	299359	304508	between_species_paralog	5	1	IPR002913	START_lipid_bd
LOC_Os06g50560	30605146	30611938	AT4G00730	299359	304508	between_species_paralog	5	1	IPR002913	START_lipid_bd
LOC_Os06g50679	30669851	30676152	AT4G00730	299359	304508	possible_ortholog	5	0
LOC_Os06g50724	30687277	30690821	AT4G00730	299359	304508	between_species_paralog	5	1	IPR002913	START_lipid_bd
LOC_Os06g39970	23776682	23779891	AT4G15290	8721487	8726669	between_species_paralog	2	1	IPR005150	Cellulose_synth
LOC_Os06g44890	27134558	27143860	AT4G30160	14753349	14760189	ortholog_many2many	5	3	IPR007122	Gelsolin
LOC_Os06g08500	4191208	4193417	AT4G30980	15079243	15081657	ortholog_many2many	3	2	IPR001092	HLH_basic
LOC_Os06g09370	4708744	4714553	AT4G30980	15079243	15081657	between_species_paralog	3	2	IPR001092	HLH_basic
LOC_Os06g02180	659149	664407	AT5G16910	5561679	5565580	ortholog_many2many	2	1	IPR005150	Cellulose_synth
LOC_Os06g22980	13413642	13417310	AT5G16910	5561679	5565580	between_species_paralog	2	1	IPR005150	Cellulose_synth
LOC_Os06g29350	16773135	16784412	AT5G20490	6926623	6937506	between_species_paralog	9	6	IPR004009	Myosin_N
LOC_Os06g29350	16773135	16784412	AT5G43900	17656894	17667451	between_species_paralog	8	5	IPR004009	Myosin_N
LOC_Os06g47110	28550557	28553079	AT5G49270	19971909	19974444	ortholog_one2many	3	2	IPR006918	GPI-anchored_pln
LOC_Os06g08500	4191208	4193417	AT5G58010	23483545	23484889	ortholog_many2many	3	2	IPR001092	HLH_basic
LOC_Os06g09370	4708744	4714553	AT5G58010	23483545	23484889	between_species_paralog	3	2	IPR001092	HLH_basic
LOC_Os06g11920	6348121	6351937	AT5G65090	26004017	26006851	ortholog_one2many	3	2	IPR005135	Endo/exonuclease/phosphatase
LOC_Os07g07320	3661375	3662409	AT1G10370	3397081	3398358	ortholog_many2many	5	3	IPR004045	Glutathione_S-Trfase_N
LOC_Os07g07390	3689168	3691323	AT1G21210	7424106	7427041	ortholog_many2many	14	5	IPR002290	Ser_thr_pkinase
LOC_Os07g14490	8256202	8257257	AT1G21210	7424106	7427041	ortholog_many2many	13	3	IPR002290	Ser_thr_pkinase
LOC_Os07g46490	27751728	27756312	AT1G77740	29220538	29224220	between_species_paralog	5	4	IPR016034	PInositol-4P-5-kinase_core_sub
LOC_Os07g05470	2538294	2544734	AT2G34680	14616622	14629129	ortholog_one2one	2	0
LOC_Os07g48550	29039441	29041305	AT3G15170	5109883	5111447	between_species_paralog	2	1	IPR003441	NAM
LOC_Os07g25370	14501061	14501639	AT3G50060	18557970	18559106	between_species_paralog	5	3	IPR001005	SANT_DNA-bd
LOC_Os07g08460	4354212	4355576	AT4G14550	8347822	8350019	between_species_paralog	3	1	IPR003311	AUX_IAA
LOC_Os07g49150	29434678	29439140	AT4G29040	14312303	14314600	ortholog_many2many	6	3	IPR003959	ATPase_AAA_core
LOC_Os07g10910	5971102	5976583	AT5G03540	889566	894167	between_species_paralog	3	1	IPR004140	Exo70
LOC_Os07g10940	5986858	5996196	AT5G03540	889566	894167	between_species_paralog	2	1	IPR004140	Exo70
LOC_Os07g10960	6014224	6016400	AT5G03540	889566	894167	between_species_paralog	2	1	IPR004140	Exo70
LOC_Os07g10970	6016655	6020153	AT5G03540	889566	894167	between_species_paralog	2	1	IPR004140	Exo70
LOC_Os07g12830	7346759	7350687	AT5G09680	2999202	3000601	ortholog_one2one	3	1	IPR001199	Cyt_B5
LOC_Os07g02060	629562	633316	AT5G13080	4149740	4151150	between_species_paralog	2	1	IPR003657	WRKY_DNA_bd
LOC_Os07g47330	28298599	28300097	AT5G18560	6164587	6165991	ortholog_one2one	3	2	IPR001471	TF_ERF_DNA-bd
LOC_Os07g08460	4354212	4355576	AT5G25890	9033415	9034834	between_species_paralog	3	1	IPR003311	AUX_IAA
LOC_Os07g08140	4138161	4141450	AT5G45710	18540850	18542863	between_species_paralog	2	1	IPR000232	HSF_DNA_bd
LOC_Os07g02800	1045017	1047052	AT1G13300	4556892	4558708	between_species_paralog	5	3	IPR006447	SHAQKYF_myb_bd
LOC_Os07g09610	5101510	5106299	AT3G01090	31181	34597	between_species_paralog	12	5	IPR001772	Kinase-assoc_KA1
LOC_Os07g04560	2022159	2024062	AT1G26870	9312856	9314983	between_species_paralog	2	1	IPR003441	NAM
LOC_Os07g49150	29434678	29439140	AT4G29040	14312303	14314600	ortholog_many2many	6	3	IPR003959	ATPase_AAA_core
LOC_Os07g08460	4354212	4355576	AT1G04550	1240375	1242121	between_species_paralog	3	1	IPR003311	AUX_IAA
LOC_Os07g32420	19280745	19288780	AT1G06230	1906963	1910848	between_species_paralog	2	1	IPR001487	Bromodomain
LOC_Os07g07320	3661375	3662409	AT1G10370	3397081	3398358	ortholog_many2many	5	3	IPR004045	Glutathione_S-Trfase_N
LOC_Os07g02800	1045017	1047052	AT1G13300	4556892	4558708	between_species_paralog	5	3	IPR006447	SHAQKYF_myb_bd
LOC_Os07g07390	3689168	3691323	AT1G21210	7424106	7427041	ortholog_many2many	14	5	IPR002290	Ser_thr_pkinase
LOC_Os07g14490	8256202	8257257	AT1G21210	7424106	7427041	ortholog_many2many	13	3	IPR002290	Ser_thr_pkinase
LOC_Os07g09020	4701864	4711518	AT1G48410	17885633	17892596	between_species_paralog	5	4	IPR014811	DUF1785
LOC_Os07g28850	16892637	16899212	AT1G48410	17885633	17892596	between_species_paralog	6	4	IPR014811	DUF1785
LOC_Os07g03250	1298598	1303299	AT1G51190	18977284	18980618	between_species_paralog	3	2	IPR001471	TF_ERF_DNA-bd
LOC_Os07g29780	17504863	17507823	AT1G52240	19455766	19459586	between_species_paralog	3	1	IPR005512	Rop_nucl_exchang_PRONE
LOC_Os07g25420	14526454	14529530	AT1G64520	23956386	23958322	ortholog_one2many	2	1	IPR005062	SAC3/GANP/Nin1/mts3/eIF-3-p25
LOC_Os07g01820	470174	476655	AT1G71692	26952645	26955127	between_species_paralog	3	2	IPR002100	TF_MADSbox
LOC_Os07g41370	24787482	24792890	AT1G71692	26952645	26955127	between_species_paralog	3	2	IPR002100	TF_MADSbox
LOC_Os07g04520	1991458	1993662	AT2G18470	8005285	8008052	ortholog_many2many	9	4	IPR002290	Ser_thr_pkinase
LOC_Os07g09610	5101510	5106299	AT3G01090	31181	34597	between_species_paralog	12	5	IPR001772	Kinase-assoc_KA1
LOC_Os07g48550	29039441	29041305	AT3G15170	5109883	5111447	between_species_paralog	2	1	IPR003441	NAM
LOC_Os07g03250	1298598	1303299	AT3G20840	7300675	7303693	between_species_paralog	3	2	IPR001471	TF_ERF_DNA-bd
LOC_Os07g25370	14501061	14501639	AT3G50060	18557970	18559106	between_species_paralog	5	3	IPR001005	SANT_DNA-bd
LOC_Os07g08120	4117355	4122593	AT3G51770	19199781	19204464	between_species_paralog	5	4	IPR001440	TPR-1
LOC_Os07g47130	28181286	28182198	AT4G00730	299359	304508	between_species_paralog	5	1	IPR002913	START_lipid_bd
LOC_Os07g12510	7138571	7139780	AT4G23750	12376194	12378024	ortholog_many2many	4	2	IPR001471	TF_ERF_DNA-bd
LOC_Os07g49150	29434678	29439140	AT4G29040	14312303	14314600	ortholog_many2many	6	3	IPR003959	ATPase_AAA_core
LOC_Os07g19130	11325344	11326866	AT4G31500	15273471	15275310	between_species_paralog	7	3	IPR001128	Cyt_P450
LOC_Os07g19150	11335673	11337119	AT4G31500	15273471	15275310	between_species_paralog	5	1	IPR001128	Cyt_P450
LOC_Os07g19210	11379994	11382796	AT4G31500	15273471	15275310	between_species_paralog	7	3	IPR001128	Cyt_P450
LOC_Os07g39310	23539714	23543082	AT5G03150	745644	749007	between_species_paralog	5	2	IPR015880	Znf_C2H2-like
LOC_Os07g10910	5971102	5976583	AT5G03540	889566	894167	between_species_paralog	3	1	IPR004140	Exo70
LOC_Os07g10940	5986858	5996196	AT5G03540	889566	894167	between_species_paralog	2	1	IPR004140	Exo70
LOC_Os07g10960	6014224	6016400	AT5G03540	889566	894167	between_species_paralog	2	1	IPR004140	Exo70
LOC_Os07g10970	6016655	6020153	AT5G03540	889566	894167	between_species_paralog	2	1	IPR004140	Exo70
LOC_Os07g39960	23972464	23975725	AT5G04340	1216131	1217106	ortholog_many2many	3	2	IPR015880	Znf_C2H2-like
LOC_Os07g39970	23979546	23980257	AT5G04340	1216131	1217106	between_species_paralog	3	2	IPR015880	Znf_C2H2-like
LOC_Os07g40080	24054007	24054956	AT5G04340	1216131	1217106	ortholog_many2many	3	2	IPR015880	Znf_C2H2-like
LOC_Os07g03250	1298598	1303299	AT5G10510	3315529	3320202	between_species_paralog	3	2	IPR001471	TF_ERF_DNA-bd
LOC_Os07g02060	629562	633316	AT5G13080	4149740	4151150	between_species_paralog	2	1	IPR003657	WRKY_DNA_bd
LOC_Os07g41730	25006229	25011600	AT5G20520	6943154	6946454	ortholog_one2one	4	1	IPR002470	Peptidase_S9A
LOC_Os07g08140	4138161	4141450	AT5G45710	18540850	18542863	between_species_paralog	2	1	IPR000232	HSF_DNA_bd
LOC_Os07g29960	17639730	17642259	AT5G48000	19444138	19447850	ortholog_many2many	7	4	IPR002397	Cyt_P450_B
LOC_Os07g39430	23618644	23622185	AT5G55580	22515440	22517929	ortholog_one2one	2	1	IPR003690	Mit_transcrip_term-rel
LOC_Os07g03250	1298598	1303299	AT5G57390	23253459	23256450	between_species_paralog	3	2	IPR001471	TF_ERF_DNA-bd
LOC_Os07g13260	7603092	7604703	AT5G60200	24240975	24242523	between_species_paralog	3	1	IPR003851	Znf_Dof
LOC_Os07g32510	19361164	19363746	AT5G60200	24240975	24242523	between_species_paralog	3	1	IPR003851	Znf_Dof
LOC_Os07g39320	23558527	23559875	AT5G66700	26634320	26635885	ortholog_many2many	6	4	IPR000047	HTH_lambrepressr
LOC_Os07g39840	23887296	23890645	AT1G19360	6690456	6692477	ortholog_one2many	1	0
LOC_Os07g39940	23956022	23957274	AT1G27740	9654688	9656089	between_species_paralog	3	2	IPR001092	HLH_basic
LOC_Os07g39940	23956022	23957274	AT1G27740	9654688	9656089	between_species_paralog	3	2	IPR001092	HLH_basic
LOC_Os07g07580	3796311	3799844	AT1G48380	17877413	17879270	ortholog_one2many	1	0
LOC_Os07g29780	17504863	17507823	AT1G52240	19455766	19459586	between_species_paralog	3	1	IPR005512	Rop_nucl_exchang_PRONE
LOC_Os07g39840	23887296	23890645	AT1G75110	28194115	28195933	ortholog_one2many	1	0
LOC_Os07g39840	23887296	23890645	AT1G75120	28196857	28198802	ortholog_one2many	1	0
LOC_Os07g42890	25676801	25678854	AT2G22475	9541401	9545010	between_species_paralog	2	1	IPR004182	GRAM
LOC_Os07g08440	4337515	4341220	AT2G24260	10319334	10322222	between_species_paralog	3	1	IPR011598	HLH_DNA_bd
LOC_Os07g46490	27751728	27756312	AT2G26420	11239434	11242239	between_species_paralog	5	4	IPR016034	PInositol-4P-5-kinase_core_sub
LOC_Os07g07910	3969391	3974826	AT2G26650	11331850	11336607	between_species_paralog	8	6	IPR000595	cNMP_bd
LOC_Os07g29780	17504863	17507823	AT2G45890	18883473	18885566	ortholog_many2many	2	1	IPR005512	Rop_nucl_exchang_PRONE
LOC_Os07g09630	5115628	5118154	AT3G06300	1907582	1909804	between_species_paralog	4	3	IPR006620	Pro_4_hyd_alph
LOC_Os07g47820	28551630	28559013	AT3G06810	2146335	2150831	ortholog_one2one	9	7	IPR013107	Acyl-CoA_DH_2_C
LOC_Os07g01800	463358	464341	AT3G43960	15774055	15775657	between_species_paralog	4	2	IPR013201	Prot_inhib_I29
LOC_Os07g47130	28181286	28182198	AT4G00730	299359	304508	between_species_paralog	5	1	IPR002913	START_lipid_bd
LOC_Os07g10770	5851712	5857719	AT4G15290	8721487	8726669	between_species_paralog	4	1	IPR005150	Cellulose_synth
LOC_Os07g14850	8495194	8500911	AT4G15290	8721487	8726669	between_species_paralog	4	1	IPR005150	Cellulose_synth
LOC_Os07g24190	13740291	13746263	AT4G15290	8721487	8726669	between_species_paralog	4	1	IPR005150	Cellulose_synth
LOC_Os07g49240	29483529	29486446	AT4G18640	10259678	10263764	between_species_paralog	8	3	IPR002290	Ser_thr_pkinase
LOC_Os07g08440	4337515	4341220	AT4G30980	15079243	15081657	between_species_paralog	3	1	IPR011598	HLH_DNA_bd
LOC_Os07g39940	23956022	23957274	AT4G33880	16239363	16241137	ortholog_many2many	3	2	IPR001092	HLH_basic
LOC_Os07g27310	15874842	15879863	AT4G34580	16515327	16519534	between_species_paralog	5	4	IPR001071	CRAL_bd_toc_tran
LOC_Os07g06190	3015456	3023265	AT5G03280	787428	793356	ortholog_one2many	9	2	IPR001046	Nat-R-assoc-macro_Nramp
LOC_Os07g06300	3060700	3068674	AT5G03280	787428	793356	ortholog_one2many	9	2	IPR001046	Nat-R-assoc-macro_Nramp
LOC_Os07g49080	29381732	29384104	AT5G49270	19971909	19974444	between_species_paralog	4	2	IPR006918	GPI-anchored_pln
LOC_Os07g08440	4337515	4341220	AT5G58010	23483545	23484889	between_species_paralog	3	1	IPR011598	HLH_DNA_bd
LOC_Os07g26630	15357967	15359502	AT5G60660	24375457	24376989	ortholog_many2many	3	2	IPR012269	Aquaporin
LOC_Os07g26640	15368142	15369174	AT5G60660	24375457	24376989	ortholog_many2many	3	1	IPR000425	MIP
LOC_Os07g26660	15375923	15377299	AT5G60660	24375457	24376989	ortholog_many2many	3	2	IPR012269	Aquaporin
LOC_Os07g26690	15405449	15408808	AT5G60660	24375457	24376989	ortholog_many2many	3	2	IPR012269	Aquaporin
LOC_Os08g06120	3376472	3377335	AT1G13260	4542168	4543742	between_species_paralog	5	1	IPR003340	TF_B3
LOC_Os08g40900	25867998	25874966	AT1G19220	6628068	6633087	between_species_paralog	4	2	IPR003340	TF_B3
LOC_Os08g27780	16916342	16917379	AT1G21210	7424106	7427041	ortholog_many2many	13	4	IPR002290	Ser_thr_pkinase
LOC_Os08g36020	22699312	22704835	AT1G31880	11445490	11450189	between_species_paralog	2	1	IPR013591	DiseaseR/Znf/csome_condsation
LOC_Os08g10080	5845866	5849650	AT1G56010	20946571	20949281	ortholog_many2many	2	1	IPR003441	NAM
LOC_Os08g23740	14359922	14364031	AT2G04160	1401268	1407745	between_species_paralog	4	3	IPR000209	Peptidase_S8/S53
LOC_Os08g33488	20894502	20904168	AT2G14210	6018558	6023863	between_species_paralog	3	2	IPR002100	TF_MADSbox
LOC_Os08g44940	28209873	28211095	AT2G42430	17663444	17665295	between_species_paralog	2	1	IPR004883	LOB
LOC_Os08g24790	15006049	15007040	AT3G07390	2365301	2366496	between_species_paralog	4	2	IPR007613	DUF568_DOMON_lke
LOC_Os08g41280	26069462	26072065	AT3G07390	2365301	2366496	ortholog_one2many	5	2	IPR007613	DUF568_DOMON_lke
LOC_Os08g41290	26083828	26085120	AT3G07390	2365301	2366496	ortholog_one2many	5	2	IPR007613	DUF568_DOMON_lke
LOC_Os08g33670	21022831	21026246	AT3G15170	5109883	5111447	between_species_paralog	2	1	IPR003441	NAM
LOC_Os08g40030	25348810	25351039	AT3G15170	5109883	5111447	between_species_paralog	2	1	IPR003441	NAM
LOC_Os08g45030	28261552	28267415	AT3G28860	10870038	10877506	between_species_paralog	7	3	IPR003439	ABC_transporter-like
LOC_Os08g34960	22009904	22010506	AT3G50060	18557970	18559106	between_species_paralog	5	3	IPR001005	SANT_DNA-bd
LOC_Os08g44940	28209873	28211095	AT3G58190	21548484	21549558	ortholog_one2many	2	1	IPR004883	LOB
LOC_Os08g01830	495860	499021	AT3G59420	21959647	21963041	between_species_paralog	12	5	IPR002290	Ser_thr_pkinase
LOC_Os08g28710	17555348	17557478	AT3G59420	21959647	21963041	between_species_paralog	10	4	IPR002290	Ser_thr_pkinase
LOC_Os08g27678	16866550	16868092	AT4G12550	7439115	7439805	ortholog_many2many	3	2	IPR016140	Bifunc_inhib/LTP/seed_store
LOC_Os08g01780	467150	472512	AT4G14550	8347822	8350019	between_species_paralog	3	1	IPR003311	AUX_IAA
LOC_Os08g28880	17660867	17663808	AT4G37070	17464785	17467109	between_species_paralog	4	2	IPR016035	Acyl_Trfase/lysoPlipase
LOC_Os08g37180	23489179	23491818	AT4G37070	17464785	17467109	between_species_paralog	3	2	IPR016035	Acyl_Trfase/lysoPlipase
LOC_Os08g37210	23500229	23502596	AT4G37070	17464785	17467109	between_species_paralog	3	2	IPR016035	Acyl_Trfase/lysoPlipase
LOC_Os08g37250	23542816	23545440	AT4G37070	17464785	17467109	between_species_paralog	3	2	IPR016035	Acyl_Trfase/lysoPlipase
LOC_Os08g19320	11557455	11562793	AT5G11030	3490832	3495132	ortholog_one2one	2	0
LOC_Os08g07700	4302905	4303699	AT5G18560	6164587	6165991	between_species_paralog	3	2	IPR001471	TF_ERF_DNA-bd
LOC_Os08g40900	25867998	25874966	AT5G20730	7016445	7022113	between_species_paralog	5	2	IPR003340	TF_B3
LOC_Os08g01780	467150	472512	AT5G25890	9033415	9034834	between_species_paralog	3	1	IPR003311	AUX_IAA
LOC_Os08g15840	9627599	9632218	AT5G57740	23394585	23397650	ortholog_one2many	7	3	IPR001841	Znf_RING
LOC_Os08g13920	8326870	8328403	AT2G18800	8144912	8146265	between_species_paralog	7	5	IPR016455	XET
LOC_Os08g13980	8383574	8384803	AT2G18800	8144912	8146265	between_species_paralog	7	5	IPR016455	XET
LOC_Os08g14200	8487374	8488926	AT2G18800	8144912	8146265	between_species_paralog	7	5	IPR016455	XET
LOC_Os08g14210	8492865	8494320	AT2G18800	8144912	8146265	between_species_paralog	7	4	IPR008264	Beta_glucanase
LOC_Os08g37800	23939523	23944697	AT3G01090	31181	34597	ortholog_many2many	12	7	IPR000449	UBA/transl_elong_EF1B_N
LOC_Os08g02160	731023	733595	AT1G26870	9312856	9314983	between_species_paralog	3	1	IPR003441	NAM
LOC_Os08g33910	21215512	21217536	AT1G26870	9312856	9314983	between_species_paralog	2	1	IPR003441	NAM
LOC_Os08g01330	209413	211451	AT1G33280	12072741	12073839	between_species_paralog	2	1	IPR003441	NAM
LOC_Os08g02300	855111	857609	AT1G33280	12072741	12073839	between_species_paralog	3	1	IPR003441	NAM
LOC_Os08g01330	209413	211451	AT1G79580	29940850	29943602	between_species_paralog	2	1	IPR003441	NAM
LOC_Os08g02300	855111	857609	AT1G79580	29940850	29943602	between_species_paralog	3	1	IPR003441	NAM
LOC_Os08g01830	495860	499021	AT3G59420	21959647	21963041	between_species_paralog	12	5	IPR002290	Ser_thr_pkinase
LOC_Os08g28710	17555348	17557478	AT3G59420	21959647	21963041	between_species_paralog	10	4	IPR002290	Ser_thr_pkinase
LOC_Os08g01330	209413	211451	AT4G10350	6415256	6416829	between_species_paralog	2	1	IPR003441	NAM
LOC_Os08g02300	855111	857609	AT4G10350	6415256	6416829	between_species_paralog	3	1	IPR003441	NAM
LOC_Os08g01780	467150	472512	AT1G04550	1240375	1242121	between_species_paralog	3	1	IPR003311	AUX_IAA
LOC_Os08g41270	26059752	26067127	AT1G05630	1682318	1687363	ortholog_many2many	7	3	IPR001680	WD40_repeat
LOC_Os08g03360	1566556	1572065	AT1G06230	1906963	1910848	between_species_paralog	3	0
LOC_Os08g09340	5417275	5419393	AT1G06230	1906963	1910848	between_species_paralog	3	1	IPR001487	Bromodomain
LOC_Os08g06120	3376472	3377335	AT1G13260	4542168	4543742	between_species_paralog	5	1	IPR003340	TF_B3
LOC_Os08g39390	24902585	24906253	AT1G13290	4550153	4551620	between_species_paralog	3	2	IPR015880	Znf_C2H2-like
LOC_Os08g37350	23590978	23598418	AT1G17110	5845660	5850934	between_species_paralog	4	2	IPR002893	Znf_MYND
LOC_Os08g40900	25867998	25874966	AT1G19220	6628068	6633087	between_species_paralog	4	2	IPR003340	TF_B3
LOC_Os08g40900	25867998	25874966	AT1G19850	6886879	6891374	between_species_paralog	5	2	IPR003340	TF_B3
LOC_Os08g27780	16916342	16917379	AT1G21210	7424106	7427041	ortholog_many2many	13	4	IPR002290	Ser_thr_pkinase
LOC_Os08g41720	26329609	26332845	AT1G23080	8180577	8183570	between_species_paralog	3	1	IPR004776	Auxin_eff
LOC_Os08g36020	22699312	22704835	AT1G31880	11445490	11450189	between_species_paralog	2	1	IPR013591	DiseaseR/Znf/csome_condsation
LOC_Os08g36020	22699312	22704835	AT1G31880	11445490	11450189	between_species_paralog	2	1	IPR013591	DiseaseR/Znf/csome_condsation
LOC_Os08g43070	27220454	27221245	AT1G32640	11798810	11800988	between_species_paralog	6	2	IPR001092	HLH_basic
LOC_Os08g09350	5421261	5425677	AT1G48920	18098095	18101623	ortholog_many2many	4	1	IPR000504	RRM_RNP1
LOC_Os08g07440	4174875	4177552	AT1G51190	18977284	18980618	between_species_paralog	3	2	IPR001471	TF_ERF_DNA-bd
LOC_Os08g10080	5845866	5849650	AT1G56010	20946571	20949281	ortholog_many2many	2	1	IPR003441	NAM
LOC_Os08g29150	17841476	17848203	AT1G59820	22011328	22020294	between_species_paralog	7	3	IPR008250	ATPase_P-typ_ATPase-assoc-reg
LOC_Os08g04780	2384409	2388283	AT1G62830	23264490	23267202	between_species_paralog	6	4	IPR006076	FAD-dep_OxRdtase
LOC_Os08g41720	26329609	26332845	AT1G70940	26743054	26746395	between_species_paralog	3	1	IPR004776	Auxin_eff
LOC_Os08g02070	678358	680739	AT1G71692	26952645	26955127	ortholog_one2many	3	2	IPR002100	TF_MADSbox
LOC_Os08g41950	26504466	26509547	AT1G71692	26952645	26955127	between_species_paralog	3	2	IPR002100	TF_MADSbox
LOC_Os08g41720	26329609	26332845	AT1G73590	27659673	27663178	between_species_paralog	3	1	IPR004776	Auxin_eff
LOC_Os08g41720	26329609	26332845	AT2G01420	180105	183328	between_species_paralog	3	1	IPR004776	Auxin_eff
LOC_Os08g33488	20894502	20904168	AT2G14210	6018558	6023863	between_species_paralog	3	2	IPR002100	TF_MADSbox
LOC_Os08g25430	15473842	15480355	AT2G17780	7724885	7727404	ortholog_many2many	7	0
LOC_Os08g13920	8326870	8328403	AT2G18800	8144912	8146265	between_species_paralog	7	5	IPR016455	XET
LOC_Os08g13980	8383574	8384803	AT2G18800	8144912	8146265	between_species_paralog	7	5	IPR016455	XET
LOC_Os08g14200	8487374	8488926	AT2G18800	8144912	8146265	between_species_paralog	7	5	IPR016455	XET
LOC_Os08g14210	8492865	8494320	AT2G18800	8144912	8146265	between_species_paralog	7	4	IPR008264	Beta_glucanase
LOC_Os08g02540	1045939	1049011	AT2G37250	15641906	15643786	between_species_paralog	3	1	IPR000850	Adenylate_kin
LOC_Os08g06060	3306523	3309593	AT2G43790	18138307	18140988	between_species_paralog	11	6	IPR008351	JNK_MAPK
LOC_Os08g37800	23939523	23944697	AT3G01090	31181	34597	ortholog_many2many	12	7	IPR000449	UBA/transl_elong_EF1B_N
LOC_Os08g33670	21022831	21026246	AT3G15170	5109883	5111447	between_species_paralog	2	1	IPR003441	NAM
LOC_Os08g40030	25348810	25351039	AT3G15170	5109883	5111447	between_species_paralog	2	1	IPR003441	NAM
LOC_Os08g07440	4174875	4177552	AT3G20840	7300675	7303693	between_species_paralog	3	2	IPR001471	TF_ERF_DNA-bd
LOC_Os08g33590	20971546	20974541	AT3G25710	9369519	9371394	ortholog_many2many	3	2	IPR001092	HLH_basic
LOC_Os08g37290	23569849	23570674	AT3G25710	9369519	9371394	between_species_paralog	4	2	IPR001092	HLH_basic
LOC_Os08g45030	28261552	28267415	AT3G28860	10870038	10877506	between_species_paralog	7	3	IPR003439	ABC_transporter-like
LOC_Os08g34960	22009904	22010506	AT3G50060	18557970	18559106	between_species_paralog	5	3	IPR001005	SANT_DNA-bd
LOC_Os08g04190	2033457	2036507	AT4G00730	299359	304508	between_species_paralog	9	3	IPR001356	Homeobox
LOC_Os08g08820	5108241	5115784	AT4G00730	299359	304508	between_species_paralog	8	3	IPR001356	Homeobox
LOC_Os08g36220	22826569	22828412	AT4G16780	9449114	9450743	between_species_paralog	10	4	IPR000047	HTH_lambrepressr
LOC_Os08g37350	23590978	23598418	AT4G24560	12679210	12684939	ortholog_many2many	4	2	IPR002893	Znf_MYND
LOC_Os08g15090	9126981	9135749	AT4G30340	14838291	14841067	ortholog_many2many	6	2	IPR001206	Diacylglycerol_kinase_cat
LOC_Os08g44050	27730405	27736989	AT5G03150	745644	749007	between_species_paralog	4	2	IPR015880	Znf_C2H2-like
LOC_Os08g20580	12356708	12357964	AT5G04340	1216131	1217106	between_species_paralog	3	2	IPR015880	Znf_C2H2-like
LOC_Os08g07440	4174875	4177552	AT5G10510	3315529	3320202	ortholog_many2many	3	2	IPR001471	TF_ERF_DNA-bd
LOC_Os08g43410	27455593	27457220	AT5G12330	3987375	3989833	between_species_paralog	5	3	IPR006511	LRP1_C
LOC_Os08g40900	25867998	25874966	AT5G20730	7016445	7022113	between_species_paralog	5	2	IPR003340	TF_B3
LOC_Os08g35510	22366664	22368226	AT5G47990	19434827	19436689	between_species_paralog	7	3	IPR001128	Cyt_P450
LOC_Os08g23180	13982326	13985506	AT5G55730	22558148	22560461	ortholog_many2many	2	1	IPR000782	FAS1_domain
LOC_Os08g38270	24249970	24251221	AT5G55730	22558148	22560461	ortholog_many2many	2	1	IPR000782	FAS1_domain
LOC_Os08g39270	24815594	24817738	AT5G55730	22558148	22560461	between_species_paralog	3	1	IPR000782	FAS1_domain
LOC_Os08g07440	4174875	4177552	AT5G57390	23253459	23256450	between_species_paralog	3	2	IPR001471	TF_ERF_DNA-bd
LOC_Os08g35490	22359625	22360155	AT5G59030	23833728	23834511	between_species_paralog	3	1	IPR007274	Cop_transporter
LOC_Os08g38220	24229962	24231258	AT5G60200	24240975	24242523	between_species_paralog	3	1	IPR003851	Znf_Dof
LOC_Os08g08110	4598740	4603717	AT5G63770	25518641	25523621	between_species_paralog	5	2	IPR001206	Diacylglycerol_kinase_cat
LOC_Os08g32080	19881299	19885645	AT5G66700	26634320	26635885	between_species_paralog	7	4	IPR000047	HTH_lambrepressr
LOC_Os08g32085	19881619	19885150	AT5G66700	26634320	26635885	between_species_paralog	7	4	IPR000047	HTH_lambrepressr
LOC_Os08g37580	23800666	23802738	AT5G66700	26634320	26635885	between_species_paralog	7	4	IPR000047	HTH_lambrepressr
LOC_Os08g44790	28134835	28136001	AT1G12560	4276519	4277899	between_species_paralog	8	5	IPR005132	RlpA
LOC_Os08g41720	26329609	26332845	AT1G70940	26743054	26746395	between_species_paralog	3	1	IPR004776	Auxin_eff
LOC_Os08g33590	20971546	20974541	AT3G25710	9369519	9371394	ortholog_many2many	3	2	IPR001092	HLH_basic
LOC_Os08g37290	23569849	23570674	AT3G25710	9369519	9371394	between_species_paralog	4	2	IPR001092	HLH_basic
LOC_Os08g44270	27872428	27873885	AT3G43960	15774055	15775657	between_species_paralog	5	2	IPR013201	Prot_inhib_I29
LOC_Os08g04190	2033457	2036507	AT4G00730	299359	304508	between_species_paralog	9	3	IPR001356	Homeobox
LOC_Os08g08820	5108241	5115784	AT4G00730	299359	304508	between_species_paralog	8	3	IPR001356	Homeobox
LOC_Os08g39350	24863225	24869446	AT4G26690	13456434	13460060	ortholog_many2many	3	2	IPR017946	PLC-like_Pdiesterase_TIM-brl
LOC_Os08g14230	8507453	8515439	AT4G30160	14753349	14760189	ortholog_many2many	4	2	IPR007122	Gelsolin
LOC_Os08g25310	15388857	15395938	AT4G34580	16515327	16519534	between_species_paralog	5	4	IPR001071	CRAL_bd_toc_tran
LOC_Os08g38850	24558179	24563398	AT4G34580	16515327	16519534	between_species_paralog	5	4	IPR001071	CRAL_bd_toc_tran
LOC_Os08g25710	15639361	15643226	AT5G16910	5561679	5565580	between_species_paralog	2	1	IPR005150	Cellulose_synth
LOC_Os08g06240	3437451	3441006	AT5G45420	18404069	18406606	ortholog_one2one	7	2	IPR001005	SANT_DNA-bd
LOC_Os08g15149	9164972	9167361	AT5G51310	20852854	20854718	between_species_paralog	3	1	IPR005123	Oxoglutarate/Fe-dep_oxygenase
LOC_Os08g32960	20447312	20449557	AT5G65090	26004017	26006851	between_species_paralog	3	2	IPR005135	Endo/exonuclease/phosphatase
LOC_Os09g29200	17746171	17747912	AT1G10370	3397081	3398358	ortholog_many2many	4	4	IPR004046	GST_C
LOC_Os09g20740	12493568	12497571	AT1G21210	7424106	7427041	ortholog_many2many	15	6	IPR002290	Ser_thr_pkinase
LOC_Os09g29510	17948935	17953034	AT1G21210	7424106	7427041	ortholog_many2many	15	6	IPR002290	Ser_thr_pkinase
LOC_Os09g29520	17960168	17961784	AT1G21210	7424106	7427041	ortholog_many2many	13	4	IPR002290	Ser_thr_pkinase
LOC_Os09g29560	17975510	17978417	AT1G21210	7424106	7427041	ortholog_many2many	15	6	IPR002290	Ser_thr_pkinase
LOC_Os09g29584	17986173	17995612	AT1G21210	7424106	7427041	ortholog_many2many	13	4	IPR002290	Ser_thr_pkinase
LOC_Os09g29600	18001497	18007035	AT1G21210	7424106	7427041	ortholog_many2many	13	3	IPR001881	EGF_Ca_bd
LOC_Os09g27220	16551512	16553781	AT1G31880	11445490	11450189	between_species_paralog	2	0
LOC_Os09g27230	16554670	16556678	AT1G31880	11445490	11450189	between_species_paralog	2	1	IPR013591	DiseaseR/Znf/csome_condsation
LOC_Os09g30250	18413042	18421768	AT2G04160	1401268	1407745	ortholog_many2many	4	3	IPR000209	Peptidase_S8/S53
LOC_Os09g36110	20793975	20797285	AT2G04160	1401268	1407745	between_species_paralog	4	3	IPR000209	Peptidase_S8/S53
LOC_Os09g07300	3589118	3606830	AT3G02260	430984	448489	ortholog_one2one	7	3	IPR013993	Znf_N-recognin_met
LOC_Os09g32470	19384195	19386611	AT3G07390	2365301	2366496	ortholog_one2many	4	2	IPR007613	DUF568_DOMON_lke
LOC_Os09g24560	14616481	14618068	AT3G15170	5109883	5111447	between_species_paralog	2	1	IPR003441	NAM
LOC_Os09g32260	19252742	19255559	AT3G15170	5109883	5111447	between_species_paralog	2	1	IPR003441	NAM
LOC_Os09g01960	655425	657374	AT3G50060	18557970	18559106	ortholog_many2many	5	3	IPR001005	SANT_DNA-bd
LOC_Os09g35870	20640984	20642658	AT4G14550	8347822	8350019	between_species_paralog	3	1	IPR003311	AUX_IAA
LOC_Os09g29760	18090034	18091233	AT4G33495	16110712	16112597	between_species_paralog	2	1	IPR001578	Peptidase_C12
LOC_Os09g28770	17475730	17478575	AT4G37070	17464785	17467109	possible_ortholog	3	2	IPR016035	Acyl_Trfase/lysoPlipase
LOC_Os09g35870	20640984	20642658	AT5G25890	9033415	9034834	between_species_paralog	3	1	IPR003311	AUX_IAA
LOC_Os09g36300	20945434	20952455	AT5G47040	19093152	19098715	ortholog_one2one	13	10	IPR011704	ATPase_AAA-5
LOC_Os09g36450	21032574	21036026	AT2G21170	9070754	9073233	ortholog_one2one	2	1	IPR000652	Triosephosphate_isomerase
LOC_Os09g35870	20640984	20642658	AT1G04550	1240375	1242121	between_species_paralog	3	1	IPR003311	AUX_IAA
LOC_Os09g32440	19363497	19368463	AT1G05630	1682318	1687363	ortholog_many2many	7	3	IPR001680	WD40_repeat
LOC_Os09g29200	17746171	17747912	AT1G10370	3397081	3398358	ortholog_many2many	4	4	IPR004046	GST_C
LOC_Os09g10980	6060400	6065866	AT1G13290	4550153	4551620	between_species_paralog	3	2	IPR015880	Znf_C2H2-like
LOC_Os09g13680	7994738	7995963	AT1G13290	4550153	4551620	ortholog_one2one	4	2	IPR015880	Znf_C2H2-like
LOC_Os09g31140	18734015	18738476	AT1G13290	4550153	4551620	between_species_paralog	3	2	IPR015880	Znf_C2H2-like
LOC_Os09g28940	17599529	17607512	AT1G17110	5845660	5850934	between_species_paralog	4	1	IPR001394	Peptidase_C19
LOC_Os09g20740	12493568	12497571	AT1G21210	7424106	7427041	ortholog_many2many	15	6	IPR002290	Ser_thr_pkinase
LOC_Os09g29510	17948935	17953034	AT1G21210	7424106	7427041	ortholog_many2many	15	6	IPR002290	Ser_thr_pkinase
LOC_Os09g29520	17960168	17961784	AT1G21210	7424106	7427041	ortholog_many2many	13	4	IPR002290	Ser_thr_pkinase
LOC_Os09g29560	17975510	17978417	AT1G21210	7424106	7427041	ortholog_many2many	15	6	IPR002290	Ser_thr_pkinase
LOC_Os09g29584	17986173	17995612	AT1G21210	7424106	7427041	ortholog_many2many	13	4	IPR002290	Ser_thr_pkinase
LOC_Os09g29600	18001497	18007035	AT1G21210	7424106	7427041	ortholog_many2many	13	3	IPR001881	EGF_Ca_bd
LOC_Os09g32770	19549496	19551995	AT1G23080	8180577	8183570	between_species_paralog	4	1	IPR004776	Auxin_eff
LOC_Os09g27220	16551512	16553781	AT1G31880	11445490	11450189	between_species_paralog	2	0
LOC_Os09g27230	16554670	16556678	AT1G31880	11445490	11450189	between_species_paralog	2	1	IPR013591	DiseaseR/Znf/csome_condsation
LOC_Os09g27220	16551512	16553781	AT1G31880	11445490	11450189	between_species_paralog	2	0
LOC_Os09g27230	16554670	16556678	AT1G31880	11445490	11450189	between_species_paralog	2	1	IPR013591	DiseaseR/Znf/csome_condsation
LOC_Os09g34330	20268382	20269236	AT1G32640	11798810	11800988	between_species_paralog	3	2	IPR001092	HLH_basic
LOC_Os09g37270	21525469	21529385	AT1G52240	19455766	19459586	between_species_paralog	3	1	IPR005512	Rop_nucl_exchang_PRONE
LOC_Os09g36230	20894431	20896238	AT1G53330	19896027	19897442	between_species_paralog	2	1	IPR002885	Pentatricopeptide_repeat
LOC_Os09g32770	19549496	19551995	AT1G70940	26743054	26746395	between_species_paralog	4	1	IPR004776	Auxin_eff
LOC_Os09g32948	19652979	19659356	AT1G71692	26952645	26955127	between_species_paralog	3	2	IPR002100	TF_MADSbox
LOC_Os09g32770	19549496	19551995	AT1G73590	27659673	27663178	between_species_paralog	4	1	IPR004776	Auxin_eff
LOC_Os09g32770	19549496	19551995	AT2G01420	180105	183328	between_species_paralog	4	1	IPR004776	Auxin_eff
LOC_Os09g14580	8629074	8632197	AT2G18470	8005285	8008052	between_species_paralog	9	4	IPR002290	Ser_thr_pkinase
LOC_Os09g21760	13173381	13177162	AT2G19560	8465768	8469116	ortholog_one2one	3	2	IPR000717	PCI
LOC_Os09g36450	21032574	21036026	AT2G21170	9070754	9073233	ortholog_one2one	2	1	IPR000652	Triosephosphate_isomerase
LOC_Os09g07300	3589118	3606830	AT3G02260	430984	448489	ortholog_one2one	7	3	IPR013993	Znf_N-recognin_met
LOC_Os09g24560	14616481	14618068	AT3G15170	5109883	5111447	between_species_paralog	2	1	IPR003441	NAM
LOC_Os09g32260	19252742	19255559	AT3G15170	5109883	5111447	between_species_paralog	2	1	IPR003441	NAM
LOC_Os09g24490	14582472	14585344	AT3G25710	9369519	9371394	ortholog_many2many	3	2	IPR001092	HLH_basic
LOC_Os09g28900	17564470	17565196	AT3G25710	9369519	9371394	between_species_paralog	4	2	IPR001092	HLH_basic
LOC_Os09g01960	655425	657374	AT3G50060	18557970	18559106	ortholog_many2many	5	3	IPR001005	SANT_DNA-bd
LOC_Os09g16330	9969564	9978282	AT3G53480	19825307	19831797	possible_ortholog	6	4	IPR003439	ABC_transporter-like
LOC_Os09g16380	10007837	10020831	AT3G53480	19825307	19831797	possible_ortholog	6	4	IPR003439	ABC_transporter-like
LOC_Os09g16458	10070432	10084738	AT3G53480	19825307	19831797	possible_ortholog	5	2	IPR003439	ABC_transporter-like
LOC_Os09g35760	20567501	20574416	AT4G00730	299359	304508	ortholog_many2many	8	3	IPR001356	Homeobox
LOC_Os09g27450	16673570	16675358	AT4G16780	9449114	9450743	between_species_paralog	10	4	IPR000047	HTH_lambrepressr
LOC_Os09g13940	8198884	8202350	AT4G23750	12376194	12378024	between_species_paralog	3	2	IPR001471	TF_ERF_DNA-bd
LOC_Os09g28940	17599529	17607512	AT4G24560	12679210	12684939	ortholog_many2many	4	1	IPR001394	Peptidase_C19
LOC_Os09g38340	22063973	22070270	AT5G03150	745644	749007	between_species_paralog	3	2	IPR015880	Znf_C2H2-like
LOC_Os09g39320	22598493	22607901	AT5G03730	974498	979849	ortholog_one2many	10	4	IPR002290	Ser_thr_pkinase
LOC_Os09g36160	20837886	20839811	AT5G12330	3987375	3989833	between_species_paralog	4	3	IPR006511	LRP1_C
LOC_Os09g36300	20945434	20952455	AT5G47040	19093152	19098715	ortholog_one2one	13	10	IPR011704	ATPase_AAA-5
LOC_Os09g08990	4774513	4777505	AT5G47990	19434827	19436689	between_species_paralog	7	3	IPR001128	Cyt_P450
LOC_Os09g26940	16360322	16362288	AT5G47990	19434827	19436689	between_species_paralog	8	3	IPR001128	Cyt_P450
LOC_Os09g26960	16386700	16389414	AT5G47990	19434827	19436689	between_species_paralog	7	3	IPR001128	Cyt_P450
LOC_Os09g26980	16402632	16407073	AT5G47990	19434827	19436689	between_species_paralog	7	3	IPR001128	Cyt_P450
LOC_Os09g07350	3653972	3657804	AT5G55730	22558148	22560461	ortholog_many2many	2	1	IPR000782	FAS1_domain
LOC_Os09g30010	18256643	18257801	AT5G55730	22558148	22560461	ortholog_many2many	3	1	IPR000782	FAS1_domain
LOC_Os09g30486	18610276	18612149	AT5G55730	22558148	22560461	between_species_paralog	4	1	IPR000782	FAS1_domain
LOC_Os09g36670	21151255	21153877	AT5G58710	23717775	23719765	between_species_paralog	4	2	IPR015891	Cyclophilin-like
LOC_Os09g26900	16346079	16346908	AT5G59030	23833728	23834511	between_species_paralog	2	1	IPR007274	Cop_transporter
LOC_Os09g29960	18233923	18234878	AT5G60200	24240975	24242523	between_species_paralog	3	1	IPR003851	Znf_Dof
LOC_Os09g21180	12779658	12782648	AT5G66700	26634320	26635885	between_species_paralog	7	4	IPR000047	HTH_lambrepressr
LOC_Os09g29460	17902163	17904337	AT5G66700	26634320	26635885	between_species_paralog	8	4	IPR000047	HTH_lambrepressr
LOC_Os09g35910	20671273	20672801	AT5G66700	26634320	26635885	between_species_paralog	7	4	IPR000047	HTH_lambrepressr
LOC_Os09g37270	21525469	21529385	AT1G52240	19455766	19459586	between_species_paralog	3	1	IPR005512	Rop_nucl_exchang_PRONE
LOC_Os09g32770	19549496	19551995	AT1G70940	26743054	26746395	between_species_paralog	4	1	IPR004776	Auxin_eff
LOC_Os09g29120	17693147	17694485	AT2G22475	9541401	9545010	ortholog_many2many	1	1	IPR004182	GRAM
LOC_Os09g25040	14958366	14961768	AT2G24260	10319334	10322222	ortholog_many2many	5	2	IPR001092	HLH_basic
LOC_Os09g37270	21525469	21529385	AT2G45890	18883473	18885566	between_species_paralog	2	1	IPR005512	Rop_nucl_exchang_PRONE
LOC_Os09g24490	14582472	14585344	AT3G25710	9369519	9371394	ortholog_many2many	3	2	IPR001092	HLH_basic
LOC_Os09g28900	17564470	17565196	AT3G25710	9369519	9371394	between_species_paralog	4	2	IPR001092	HLH_basic
LOC_Os09g32230	19238833	19240327	AT3G43960	15774055	15775657	between_species_paralog	5	2	IPR013201	Prot_inhib_I29
LOC_Os09g35760	20567501	20574416	AT4G00730	299359	304508	ortholog_many2many	8	3	IPR001356	Homeobox
LOC_Os09g04730	2511441	2516277	AT4G05530	2816392	2818365	ortholog_one2one	7	4	IPR002424	Insect_AlcDH_fam
LOC_Os09g25490	15280267	15284909	AT4G15290	8721487	8726669	between_species_paralog	4	1	IPR005150	Cellulose_synth
LOC_Os09g30105	18300263	18303036	AT4G15290	8721487	8726669	possible_ortholog	2	0
LOC_Os09g17000	10402687	10404802	AT4G26690	13456434	13460060	ortholog_many2many	3	1	IPR017946	PLC-like_Pdiesterase_TIM-brl
LOC_Os09g25040	14958366	14961768	AT4G30980	15079243	15081657	ortholog_many2many	5	2	IPR001092	HLH_basic
LOC_Os09g30330	18463851	18467651	AT4G34580	16515327	16519534	between_species_paralog	5	4	IPR001071	CRAL_bd_toc_tran
LOC_Os09g25040	14958366	14961768	AT5G58010	23483545	23484889	ortholog_many2many	5	2	IPR001092	HLH_basic
LOC_Os09g36930	21309648	21311067	AT5G60660	24375457	24376989	between_species_paralog	3	2	IPR012269	Aquaporin
LOC_Os09g23140	13687244	13689948	AT5G65090	26004017	26006851	between_species_paralog	3	2	IPR005135	Endo/exonuclease/phosphatase
LOC_Os10g22070	11327146	11327892	AT1G10370	3397081	3398358	ortholog_many2many	5	3	IPR004045	Glutathione_S-Trfase_N
LOC_Os10g25590	13192478	13194333	AT1G10370	3397081	3398358	ortholog_many2many	5	3	IPR004045	Glutathione_S-Trfase_N
LOC_Os10g34020	18074564	18078367	AT1G10370	3397081	3398358	ortholog_many2many	4	4	IPR004046	GST_C
LOC_Os10g38140	20360254	20361744	AT1G10370	3397081	3398358	ortholog_many2many	5	4	IPR004046	GST_C
LOC_Os10g38160	20366399	20367661	AT1G10370	3397081	3398358	ortholog_many2many	5	4	IPR004046	GST_C
LOC_Os10g38189	20377571	20378519	AT1G10370	3397081	3398358	ortholog_many2many	5	3	IPR004046	GST_C
LOC_Os10g38340	20417106	20418373	AT1G10370	3397081	3398358	ortholog_many2many	6	4	IPR004046	GST_C
LOC_Os10g38350	20421811	20422818	AT1G10370	3397081	3398358	ortholog_many2many	5	4	IPR004046	GST_C
LOC_Os10g38360	20426483	20427576	AT1G10370	3397081	3398358	ortholog_many2many	6	4	IPR004046	GST_C
LOC_Os10g38470	20479688	20480900	AT1G10370	3397081	3398358	ortholog_many2many	5	4	IPR004046	GST_C
LOC_Os10g38489	20482143	20489269	AT1G10370	3397081	3398358	ortholog_many2many	6	3	IPR004045	Glutathione_S-Trfase_N
LOC_Os10g38540	20503305	20504596	AT1G10370	3397081	3398358	ortholog_many2many	6	3	IPR004045	Glutathione_S-Trfase_N
LOC_Os10g38580	20518238	20519335	AT1G10370	3397081	3398358	ortholog_many2many	5	4	IPR004046	GST_C
LOC_Os10g38590	20520980	20522087	AT1G10370	3397081	3398358	ortholog_many2many	6	4	IPR004046	GST_C
LOC_Os10g38600	20523520	20524595	AT1G10370	3397081	3398358	ortholog_many2many	6	3	IPR004045	Glutathione_S-Trfase_N
LOC_Os10g38610	20525495	20526865	AT1G10370	3397081	3398358	ortholog_many2many	5	3	IPR004045	Glutathione_S-Trfase_N
LOC_Os10g38630	20528351	20530413	AT1G10370	3397081	3398358	ortholog_many2many	4	3	IPR004045	Glutathione_S-Trfase_N
LOC_Os10g38640	20532239	20533069	AT1G10370	3397081	3398358	ortholog_many2many	5	4	IPR004046	GST_C
LOC_Os10g38660	20535946	20536939	AT1G10370	3397081	3398358	ortholog_many2many	6	3	IPR004045	Glutathione_S-Trfase_N
LOC_Os10g38670	20538559	20539815	AT1G10370	3397081	3398358	ortholog_many2many	5	4	IPR004046	GST_C
LOC_Os10g38690	20545292	20546063	AT1G10370	3397081	3398358	ortholog_many2many	7	4	IPR004046	GST_C
LOC_Os10g38700	20547844	20549096	AT1G10370	3397081	3398358	ortholog_many2many	6	4	IPR004046	GST_C
LOC_Os10g38710	20550931	20551989	AT1G10370	3397081	3398358	ortholog_many2many	5	4	IPR004046	GST_C
LOC_Os10g38720	20557566	20558474	AT1G10370	3397081	3398358	ortholog_many2many	6	3	IPR004045	Glutathione_S-Trfase_N
LOC_Os10g38730	20559539	20560391	AT1G10370	3397081	3398358	ortholog_many2many	5	3	IPR004045	Glutathione_S-Trfase_N
LOC_Os10g38740	20561791	20563433	AT1G10370	3397081	3398358	ortholog_many2many	6	3	IPR004045	Glutathione_S-Trfase_N
LOC_Os10g38780	20574231	20575452	AT1G10370	3397081	3398358	ortholog_many2many	6	3	IPR004045	Glutathione_S-Trfase_N
LOC_Os10g39190	20844640	20845578	AT1G13260	4542168	4543742	between_species_paralog	5	1	IPR003340	TF_B3
LOC_Os10g01390	238156	241301	AT1G21210	7424106	7427041	ortholog_many2many	13	3	IPR002290	Ser_thr_pkinase
LOC_Os10g02250	791735	798344	AT1G21210	7424106	7427041	ortholog_many2many	15	7	IPR002290	Ser_thr_pkinase
LOC_Os10g02276	815226	816179	AT1G21210	7424106	7427041	ortholog_many2many	11	0
LOC_Os10g02284	817676	820860	AT1G21210	7424106	7427041	ortholog_many2many	14	6	IPR002290	Ser_thr_pkinase
LOC_Os10g02720	1065852	1071048	AT1G21210	7424106	7427041	ortholog_many2many	15	6	IPR002290	Ser_thr_pkinase
LOC_Os10g06030	3059913	3064524	AT1G21210	7424106	7427041	ortholog_many2many	15	6	IPR002290	Ser_thr_pkinase
LOC_Os10g06090	3089573	3096422	AT1G21210	7424106	7427041	ortholog_many2many	15	6	IPR002290	Ser_thr_pkinase
LOC_Os10g06140	3120996	3126249	AT1G21210	7424106	7427041	ortholog_many2many	15	6	IPR002290	Ser_thr_pkinase
LOC_Os10g07548	4050255	4054668	AT1G21210	7424106	7427041	ortholog_many2many	13	4	IPR002290	Ser_thr_pkinase
LOC_Os10g07556	4074620	4080597	AT1G21210	7424106	7427041	ortholog_many2many	15	7	IPR002290	Ser_thr_pkinase
LOC_Os10g09550	5174173	5177495	AT1G21210	7424106	7427041	ortholog_many2many	15	6	IPR002290	Ser_thr_pkinase
LOC_Os10g09620	5215480	5221183	AT1G21210	7424106	7427041	ortholog_many2many	14	6	IPR002290	Ser_thr_pkinase
LOC_Os10g09700	5258692	5261784	AT1G21210	7424106	7427041	ortholog_many2many	15	5	IPR002290	Ser_thr_pkinase
LOC_Os10g17890	8970821	8971732	AT1G21210	7424106	7427041	ortholog_many2many	11	0
LOC_Os10g17910	8985162	8986337	AT1G21210	7424106	7427041	ortholog_many2many	13	4	IPR002290	Ser_thr_pkinase
LOC_Os10g42710	22963812	22968187	AT1G32230	11612118	11616218	ortholog_many2many	4	1	IPR012317	PARP_catalytic
LOC_Os10g33760	17777861	17780170	AT1G56010	20946571	20949281	between_species_paralog	2	1	IPR003441	NAM
LOC_Os10g05690	2848573	2854786	AT1G77690	29200941	29203340	between_species_paralog	2	1	IPR013057	AA_transpt_TM
LOC_Os10g42710	22963812	22968187	AT2G35510	14916723	14920377	ortholog_many2many	3	1	IPR012317	PARP_catalytic
LOC_Os10g05690	2848573	2854786	AT2G38120	15972993	15977180	between_species_paralog	2	1	IPR013057	AA_transpt_TM
LOC_Os10g07510	3990764	3992624	AT2G42430	17663444	17665295	between_species_paralog	4	1	IPR004883	LOB
LOC_Os10g41360	22156100	22163731	AT2G44900	18511719	18516408	ortholog_one2many	5	2	IPR000225	Armadillo
LOC_Os10g20990	10554729	10559060	AT3G50060	18557970	18559106	between_species_paralog	7	3	IPR001005	SANT_DNA-bd
LOC_Os10g31820	16615599	16622388	AT3G53180	19706894	19711439	ortholog_one2one	4	2	IPR006992	Amidohydro_2
LOC_Os10g07510	3990764	3992624	AT3G58190	21548484	21549558	between_species_paralog	4	1	IPR004883	LOB
LOC_Os10g41360	22156100	22163731	AT3G60350	22306488	22311186	ortholog_one2many	5	2	IPR000225	Armadillo
LOC_Os10g09920	5385768	5386212	AT4G12550	7439115	7439805	between_species_paralog	3	2	IPR016140	Bifunc_inhib/LTP/seed_store
LOC_Os10g20830	10491944	10492662	AT4G12550	7439115	7439805	ortholog_many2many	3	2	IPR016140	Bifunc_inhib/LTP/seed_store
LOC_Os10g20840	10495239	10495748	AT4G12550	7439115	7439805	ortholog_many2many	3	2	IPR016140	Bifunc_inhib/LTP/seed_store
LOC_Os10g20860	10499697	10502810	AT4G12550	7439115	7439805	ortholog_many2many	3	2	IPR016140	Bifunc_inhib/LTP/seed_store
LOC_Os10g20880	10506631	10507777	AT4G12550	7439115	7439805	ortholog_many2many	3	2	IPR016140	Bifunc_inhib/LTP/seed_store
LOC_Os10g20890	10516103	10516785	AT4G12550	7439115	7439805	ortholog_many2many	3	2	IPR016140	Bifunc_inhib/LTP/seed_store
LOC_Os10g40420	21583869	21584729	AT4G12550	7439115	7439805	between_species_paralog	3	2	IPR016140	Bifunc_inhib/LTP/seed_store
LOC_Os10g40430	21586548	21587344	AT4G12550	7439115	7439805	ortholog_many2many	3	2	IPR016140	Bifunc_inhib/LTP/seed_store
LOC_Os10g40440	21590915	21591702	AT4G12550	7439115	7439805	ortholog_many2many	3	2	IPR016140	Bifunc_inhib/LTP/seed_store
LOC_Os10g40460	21595739	21596417	AT4G12550	7439115	7439805	ortholog_many2many	3	2	IPR016140	Bifunc_inhib/LTP/seed_store
LOC_Os10g40470	21598988	21599722	AT4G12550	7439115	7439805	ortholog_many2many	3	2	IPR016140	Bifunc_inhib/LTP/seed_store
LOC_Os10g40480	21603118	21603853	AT4G12550	7439115	7439805	ortholog_many2many	3	2	IPR016140	Bifunc_inhib/LTP/seed_store
LOC_Os10g40510	21618752	21619566	AT4G12550	7439115	7439805	ortholog_many2many	3	2	IPR016140	Bifunc_inhib/LTP/seed_store
LOC_Os10g40520	21622254	21622980	AT4G12550	7439115	7439805	ortholog_many2many	3	2	IPR016140	Bifunc_inhib/LTP/seed_store
LOC_Os10g40530	21625497	21626256	AT4G12550	7439115	7439805	ortholog_many2many	3	2	IPR016140	Bifunc_inhib/LTP/seed_store
LOC_Os10g40614	21714584	21715514	AT4G12550	7439115	7439805	ortholog_many2many	3	2	IPR016140	Bifunc_inhib/LTP/seed_store
LOC_Os10g36680	19544806	19547124	AT4G33495	16110712	16112597	between_species_paralog	2	1	IPR001578	Peptidase_C12
LOC_Os10g28340	14674867	14678941	AT5G45710	18540850	18542863	between_species_paralog	2	1	IPR000232	HSF_DNA_bd
LOC_Os10g37730	20113367	20118129	AT5G57740	23394585	23397650	between_species_paralog	6	2	IPR001841	Znf_RING
LOC_Os10g32600	17004870	17006751	AT2G25180	10724301	10726961	between_species_paralog	7	4	IPR006447	SHAQKYF_myb_bd
LOC_Os10g32600	17004870	17006751	AT3G16857	5755821	5759443	between_species_paralog	7	4	IPR006447	SHAQKYF_myb_bd
LOC_Os10g32600	17004870	17006751	AT4G31920	15444117	15446959	between_species_paralog	7	4	IPR006447	SHAQKYF_myb_bd
LOC_Os10g38834	20600278	20606871	AT1G33280	12072741	12073839	between_species_paralog	2	1	IPR003441	NAM
LOC_Os10g05690	2848573	2854786	AT1G77690	29200941	29203340	between_species_paralog	2	1	IPR013057	AA_transpt_TM
LOC_Os10g38834	20600278	20606871	AT1G79580	29940850	29943602	between_species_paralog	2	1	IPR003441	NAM
LOC_Os10g05690	2848573	2854786	AT2G21050	9034090	9036636	ortholog_one2many	2	1	IPR013057	AA_transpt_TM
LOC_Os10g33940	17980631	17985684	AT2G28350	12114331	12116848	between_species_paralog	4	2	IPR003340	TF_B3
LOC_Os10g05690	2848573	2854786	AT2G38120	15972993	15977180	between_species_paralog	2	1	IPR013057	AA_transpt_TM
LOC_Os10g31820	16615599	16622388	AT3G53180	19706894	19711439	ortholog_one2one	4	2	IPR006992	Amidohydro_2
LOC_Os10g38834	20600278	20606871	AT4G10350	6415256	6416829	between_species_paralog	2	1	IPR003441	NAM
LOC_Os10g33940	17980631	17985684	AT4G30080	14703201	14706336	between_species_paralog	4	2	IPR003340	TF_B3
LOC_Os10g05690	2848573	2854786	AT5G01240	97894	101835	between_species_paralog	2	1	IPR013057	AA_transpt_TM
LOC_Os10g36950	19729517	19732267	AT1G01550	199639	201775	ortholog_one2many	2	0
LOC_Os10g22070	11327146	11327892	AT1G10370	3397081	3398358	ortholog_many2many	5	3	IPR004045	Glutathione_S-Trfase_N
LOC_Os10g25590	13192478	13194333	AT1G10370	3397081	3398358	ortholog_many2many	5	3	IPR004045	Glutathione_S-Trfase_N
LOC_Os10g34020	18074564	18078367	AT1G10370	3397081	3398358	ortholog_many2many	4	4	IPR004046	GST_C
LOC_Os10g38140	20360254	20361744	AT1G10370	3397081	3398358	ortholog_many2many	5	4	IPR004046	GST_C
LOC_Os10g38160	20366399	20367661	AT1G10370	3397081	3398358	ortholog_many2many	5	4	IPR004046	GST_C
LOC_Os10g38189	20377571	20378519	AT1G10370	3397081	3398358	ortholog_many2many	5	3	IPR004046	GST_C
LOC_Os10g38340	20417106	20418373	AT1G10370	3397081	3398358	ortholog_many2many	6	4	IPR004046	GST_C
LOC_Os10g38350	20421811	20422818	AT1G10370	3397081	3398358	ortholog_many2many	5	4	IPR004046	GST_C
LOC_Os10g38360	20426483	20427576	AT1G10370	3397081	3398358	ortholog_many2many	6	4	IPR004046	GST_C
LOC_Os10g38470	20479688	20480900	AT1G10370	3397081	3398358	ortholog_many2many	5	4	IPR004046	GST_C
LOC_Os10g38489	20482143	20489269	AT1G10370	3397081	3398358	ortholog_many2many	6	3	IPR004045	Glutathione_S-Trfase_N
LOC_Os10g38540	20503305	20504596	AT1G10370	3397081	3398358	ortholog_many2many	6	3	IPR004045	Glutathione_S-Trfase_N
LOC_Os10g38580	20518238	20519335	AT1G10370	3397081	3398358	ortholog_many2many	5	4	IPR004046	GST_C
LOC_Os10g38590	20520980	20522087	AT1G10370	3397081	3398358	ortholog_many2many	6	4	IPR004046	GST_C
LOC_Os10g38600	20523520	20524595	AT1G10370	3397081	3398358	ortholog_many2many	6	3	IPR004045	Glutathione_S-Trfase_N
LOC_Os10g38610	20525495	20526865	AT1G10370	3397081	3398358	ortholog_many2many	5	3	IPR004045	Glutathione_S-Trfase_N
LOC_Os10g38630	20528351	20530413	AT1G10370	3397081	3398358	ortholog_many2many	4	3	IPR004045	Glutathione_S-Trfase_N
LOC_Os10g38640	20532239	20533069	AT1G10370	3397081	3398358	ortholog_many2many	5	4	IPR004046	GST_C
LOC_Os10g38660	20535946	20536939	AT1G10370	3397081	3398358	ortholog_many2many	6	3	IPR004045	Glutathione_S-Trfase_N
LOC_Os10g38670	20538559	20539815	AT1G10370	3397081	3398358	ortholog_many2many	5	4	IPR004046	GST_C
LOC_Os10g38690	20545292	20546063	AT1G10370	3397081	3398358	ortholog_many2many	7	4	IPR004046	GST_C
LOC_Os10g38700	20547844	20549096	AT1G10370	3397081	3398358	ortholog_many2many	6	4	IPR004046	GST_C
LOC_Os10g38710	20550931	20551989	AT1G10370	3397081	3398358	ortholog_many2many	5	4	IPR004046	GST_C
LOC_Os10g38720	20557566	20558474	AT1G10370	3397081	3398358	ortholog_many2many	6	3	IPR004045	Glutathione_S-Trfase_N
LOC_Os10g38730	20559539	20560391	AT1G10370	3397081	3398358	ortholog_many2many	5	3	IPR004045	Glutathione_S-Trfase_N
LOC_Os10g38740	20561791	20563433	AT1G10370	3397081	3398358	ortholog_many2many	6	3	IPR004045	Glutathione_S-Trfase_N
LOC_Os10g38780	20574231	20575452	AT1G10370	3397081	3398358	ortholog_many2many	6	3	IPR004045	Glutathione_S-Trfase_N
LOC_Os10g39190	20844640	20845578	AT1G13260	4542168	4543742	between_species_paralog	5	1	IPR003340	TF_B3
LOC_Os10g01390	238156	241301	AT1G21210	7424106	7427041	ortholog_many2many	13	3	IPR002290	Ser_thr_pkinase
LOC_Os10g02250	791735	798344	AT1G21210	7424106	7427041	ortholog_many2many	15	7	IPR002290	Ser_thr_pkinase
LOC_Os10g02276	815226	816179	AT1G21210	7424106	7427041	ortholog_many2many	11	0
LOC_Os10g02284	817676	820860	AT1G21210	7424106	7427041	ortholog_many2many	14	6	IPR002290	Ser_thr_pkinase
LOC_Os10g02720	1065852	1071048	AT1G21210	7424106	7427041	ortholog_many2many	15	6	IPR002290	Ser_thr_pkinase
LOC_Os10g06030	3059913	3064524	AT1G21210	7424106	7427041	ortholog_many2many	15	6	IPR002290	Ser_thr_pkinase
LOC_Os10g06090	3089573	3096422	AT1G21210	7424106	7427041	ortholog_many2many	15	6	IPR002290	Ser_thr_pkinase
LOC_Os10g06140	3120996	3126249	AT1G21210	7424106	7427041	ortholog_many2many	15	6	IPR002290	Ser_thr_pkinase
LOC_Os10g07548	4050255	4054668	AT1G21210	7424106	7427041	ortholog_many2many	13	4	IPR002290	Ser_thr_pkinase
LOC_Os10g07556	4074620	4080597	AT1G21210	7424106	7427041	ortholog_many2many	15	7	IPR002290	Ser_thr_pkinase
LOC_Os10g09550	5174173	5177495	AT1G21210	7424106	7427041	ortholog_many2many	15	6	IPR002290	Ser_thr_pkinase
LOC_Os10g09620	5215480	5221183	AT1G21210	7424106	7427041	ortholog_many2many	14	6	IPR002290	Ser_thr_pkinase
LOC_Os10g09700	5258692	5261784	AT1G21210	7424106	7427041	ortholog_many2many	15	5	IPR002290	Ser_thr_pkinase
LOC_Os10g17890	8970821	8971732	AT1G21210	7424106	7427041	ortholog_many2many	11	0
LOC_Os10g17910	8985162	8986337	AT1G21210	7424106	7427041	ortholog_many2many	13	4	IPR002290	Ser_thr_pkinase
LOC_Os10g02814	1125704	1130461	AT1G31930	11464985	11469185	between_species_paralog	5	1	IPR001019	Gprotein_alph_bd
LOC_Os10g42430	22785596	22788359	AT1G32640	11798810	11800988	ortholog_one2many	3	2	IPR001092	HLH_basic
LOC_Os10g21910	11202713	11213820	AT1G36160	13533411	13544009	ortholog_many2many	15	9	IPR011053	Single_hybrid_motif
LOC_Os10g40270	21513485	21516085	AT1G52240	19455766	19459586	between_species_paralog	4	1	IPR005512	Rop_nucl_exchang_PRONE
LOC_Os10g33760	17777861	17780170	AT1G56010	20946571	20949281	between_species_paralog	2	1	IPR003441	NAM
LOC_Os10g27220	14270542	14274951	AT1G59820	22011328	22020294	ortholog_one2one	4	1	IPR001757	ATPase_P-typ_ion-transptr
LOC_Os10g39130	20791431	20802276	AT1G71692	26952645	26955127	between_species_paralog	3	2	IPR002100	TF_MADSbox
LOC_Os10g26410	13651121	13651501	AT1G74500	27998175	27998821	between_species_paralog	3	2	IPR001092	HLH_basic
LOC_Os10g26460	13702486	13703138	AT1G74500	27998175	27998821	ortholog_many2many	3	2	IPR001092	HLH_basic
LOC_Os10g33940	17980631	17985684	AT1G77850	29272313	29275419	between_species_paralog	3	2	IPR003340	TF_B3
LOC_Os10g33720	17723106	17728604	AT1G78240	29432829	29436571	between_species_paralog	3	1	IPR004159	DUF248_MeTrfase
LOC_Os10g01560	371226	374691	AT2G18470	8005285	8008052	ortholog_many2many	9	4	IPR002290	Ser_thr_pkinase
LOC_Os10g32600	17004870	17006751	AT2G25180	10724301	10726961	between_species_paralog	7	4	IPR006447	SHAQKYF_myb_bd
LOC_Os10g38950	20684568	20688500	AT2G43790	18138307	18140988	between_species_paralog	13	6	IPR008351	JNK_MAPK
LOC_Os10g41360	22156100	22163731	AT2G44900	18511719	18516408	ortholog_one2many	5	2	IPR000225	Armadillo
LOC_Os10g32600	17004870	17006751	AT3G16857	5755821	5759443	between_species_paralog	7	4	IPR006447	SHAQKYF_myb_bd
LOC_Os10g20990	10554729	10559060	AT3G50060	18557970	18559106	between_species_paralog	7	3	IPR001005	SANT_DNA-bd
LOC_Os10g41360	22156100	22163731	AT3G60350	22306488	22311186	ortholog_one2many	5	2	IPR000225	Armadillo
LOC_Os10g33960	18014307	18021271	AT4G00730	299359	304508	between_species_paralog	6	3	IPR001356	Homeobox
LOC_Os10g42490	22838932	22844675	AT4G00730	299359	304508	between_species_paralog	7	3	IPR001356	Homeobox
LOC_Os10g34720	18469116	18471351	AT4G14850	8513859	8516360	between_species_paralog	2	1	IPR002885	Pentatricopeptide_repeat
LOC_Os10g01470	283701	285941	AT4G16780	9449114	9450743	between_species_paralog	8	4	IPR000047	HTH_lambrepressr
LOC_Os10g39720	21155932	21156649	AT4G16780	9449114	9450743	ortholog_many2many	6	2	IPR001356	Homeobox
LOC_Os10g41230	22081105	22082637	AT4G16780	9449114	9450743	ortholog_many2many	9	5	IPR006712	HD-ZIP_N
LOC_Os10g32600	17004870	17006751	AT4G31920	15444117	15446959	between_species_paralog	7	4	IPR006447	SHAQKYF_myb_bd
LOC_Os10g05180	2524033	2530506	AT4G38630	18057130	18059540	ortholog_one2many	3	1	IPR002035	VWF_A
LOC_Os10g28330	14668335	14671511	AT5G03150	745644	749007	between_species_paralog	3	2	IPR015880	Znf_C2H2-like
LOC_Os10g29540	15270653	15279763	AT5G03730	974498	979849	between_species_paralog	10	4	IPR002290	Ser_thr_pkinase
LOC_Os10g35940	19130077	19135339	AT5G05980	1799490	1804492	ortholog_many2many	5	3	IPR004101	Mur_ligase_C
LOC_Os10g36650	19535373	19539384	AT5G09810	3052097	3054614	ortholog_one2many	3	1	IPR004000	Actin-like
LOC_Os10g28340	14674867	14678941	AT5G45710	18540850	18542863	between_species_paralog	2	1	IPR000232	HSF_DNA_bd
LOC_Os10g16974	8423110	8433191	AT5G47990	19434827	19436689	between_species_paralog	7	3	IPR001128	Cyt_P450
LOC_Os10g17260	8608172	8610146	AT5G47990	19434827	19436689	between_species_paralog	7	3	IPR001128	Cyt_P450
LOC_Os10g36848	19656754	19663541	AT5G47990	19434827	19436689	between_species_paralog	6	3	IPR001128	Cyt_P450
LOC_Os10g10040	5477938	5483776	AT5G48000	19444138	19447850	ortholog_many2many	6	4	IPR002397	Cyt_P450_B
LOC_Os10g19140	9673245	9676552	AT5G48000	19444138	19447850	ortholog_many2many	6	4	IPR002397	Cyt_P450_B
LOC_Os10g23090	11970419	11972050	AT5G66700	26634320	26635885	between_species_paralog	7	4	IPR000047	HTH_lambrepressr
LOC_Os10g26500	13733580	13735501	AT5G66700	26634320	26635885	between_species_paralog	9	4	IPR000047	HTH_lambrepressr
LOC_Os10g19342	9807254	9809327	AT1G04160	1086495	1096146	between_species_paralog	7	1	IPR000048	IQ_CaM_bd_region
LOC_Os10g19860	9836124	9846535	AT1G04160	1086495	1096146	between_species_paralog	7	3	IPR000048	IQ_CaM_bd_region
LOC_Os10g25560	13159972	13166827	AT1G04160	1086495	1096146	between_species_paralog	7	1	IPR018444	Dil_domain
LOC_Os10g39110	20774762	20775986	AT1G12560	4276519	4277899	ortholog_many2many	7	5	IPR005132	RlpA
LOC_Os10g36650	19535373	19539384	AT1G49240	18215872	18218313	between_species_paralog	3	1	IPR004000	Actin-like
LOC_Os10g40270	21513485	21516085	AT1G52240	19455766	19459586	between_species_paralog	4	1	IPR005512	Rop_nucl_exchang_PRONE
LOC_Os10g32590	17002922	17004068	AT2G03720	1132170	1133379	between_species_paralog	2	1	IPR006016	UspA
LOC_Os10g35470	18909883	18913769	AT2G17720	7697336	7699568	possible_ortholog	4	2	IPR006620	Pro_4_hyd_alph
LOC_Os10g34730	18473600	18474798	AT2G22475	9541401	9545010	between_species_paralog	1	1	IPR004182	GRAM
LOC_Os10g36650	19535373	19539384	AT2G37620	15779174	15781561	between_species_paralog	3	1	IPR004000	Actin-like
LOC_Os10g05690	2848573	2854786	AT2G38120	15972993	15977180	between_species_paralog	2	1	IPR013057	AA_transpt_TM
LOC_Os10g40390	21555936	21565284	AT2G45160	18617862	18620150	ortholog_many2many	2	1	IPR005202	GRAS
LOC_Os10g40270	21513485	21516085	AT2G45890	18883473	18885566	ortholog_many2many	3	1	IPR005512	Rop_nucl_exchang_PRONE
LOC_Os10g27340	14356994	14361147	AT3G06300	1907582	1909804	between_species_paralog	4	3	IPR006620	Pro_4_hyd_alph
LOC_Os10g36650	19535373	19539384	AT3G18780	6474842	6477204	between_species_paralog	3	1	IPR004000	Actin-like
LOC_Os10g40390	21555936	21565284	AT3G60630	22410365	22412608	ortholog_many2many	2	1	IPR005202	GRAS
LOC_Os10g40390	21555936	21565284	AT4G00150	57199	59286	ortholog_many2many	2	1	IPR005202	GRAS
LOC_Os10g33960	18014307	18021271	AT4G00730	299359	304508	between_species_paralog	6	3	IPR001356	Homeobox
LOC_Os10g42490	22838932	22844675	AT4G00730	299359	304508	between_species_paralog	7	3	IPR001356	Homeobox
LOC_Os10g20090	10018271	10023880	AT4G15290	8721487	8726669	ortholog_many2many	2	1	IPR005150	Cellulose_synth
LOC_Os10g32980	17190725	17195386	AT4G15290	8721487	8726669	between_species_paralog	3	1	IPR005150	Cellulose_synth
LOC_Os10g03400	1446337	1450325	AT4G34580	16515327	16519534	ortholog_many2many	5	4	IPR001071	CRAL_bd_toc_tran
LOC_Os10g05180	2524033	2530506	AT4G38630	18057130	18059540	ortholog_one2many	3	1	IPR002035	VWF_A
LOC_Os10g35940	19130077	19135339	AT5G05980	1799490	1804492	ortholog_many2many	5	3	IPR004101	Mur_ligase_C
LOC_Os10g36650	19535373	19539384	AT5G09810	3052097	3054614	ortholog_one2many	3	1	IPR004000	Actin-like
LOC_Os10g42750	22990927	22994765	AT5G16910	5561679	5565580	ortholog_many2many	2	1	IPR005150	Cellulose_synth
LOC_Os10g25565	13173280	13183899	AT5G20490	6926623	6937506	between_species_paralog	9	2	IPR003593	ATPase_AAA+_core
LOC_Os10g25565	13173280	13183899	AT5G43900	17656894	17667451	between_species_paralog	7	2	IPR003593	ATPase_AAA+_core
LOC_Os10g34000	18069556	18071214	AT5G60660	24375457	24376989	ortholog_many2many	3	1	IPR000425	MIP
LOC_Os10g28660	14873037	14877766	AT5G65090	26004017	26006851	between_species_paralog	3	2	IPR005135	Endo/exonuclease/phosphatase
LOC_Os11g27450	15336244	15340245	AT1G12820	4368760	4371293	between_species_paralog	6	1	IPR006553	Leu-rich_rpt_Cys-con_subtyp
LOC_Os11g31620	18019166	18024771	AT1G12820	4368760	4371293	ortholog_many2many	5	2	IPR001810	F-box
LOC_Os11g05740	2627611	2629467	AT1G13260	4542168	4543742	between_species_paralog	4	1	IPR003340	TF_B3
LOC_Os11g46810	27566939	27569020	AT1G21210	7424106	7427041	ortholog_many2many	12	3	IPR002290	Ser_thr_pkinase
LOC_Os11g46860	27596065	27598952	AT1G21210	7424106	7427041	ortholog_many2many	15	6	IPR002290	Ser_thr_pkinase
LOC_Os11g46870	27618971	27625116	AT1G21210	7424106	7427041	ortholog_many2many	15	6	IPR002290	Ser_thr_pkinase
LOC_Os11g46880	27636678	27642080	AT1G21210	7424106	7427041	ortholog_many2many	14	5	IPR002290	Ser_thr_pkinase
LOC_Os11g46900	27651760	27656774	AT1G21210	7424106	7427041	ortholog_many2many	15	6	IPR002290	Ser_thr_pkinase
LOC_Os11g46950	27691989	27700043	AT1G21210	7424106	7427041	ortholog_many2many	14	6	IPR002290	Ser_thr_pkinase
LOC_Os11g47110	27798505	27804757	AT1G21210	7424106	7427041	ortholog_many2many	15	6	IPR002290	Ser_thr_pkinase
LOC_Os11g47140	27833767	27839509	AT1G21210	7424106	7427041	ortholog_many2many	14	6	IPR002290	Ser_thr_pkinase
LOC_Os11g47150	27842362	27846663	AT1G21210	7424106	7427041	ortholog_many2many	14	4	IPR002290	Ser_thr_pkinase
LOC_Os11g35400	20277617	20282385	AT1G49430	18291043	18295825	ortholog_one2one	3	2	IPR000873	AMP-dep_Synth/Lig
LOC_Os11g36719	21208904	21218651	AT1G55020	20525708	20530273	ortholog_many2many	5	4	IPR013819	LipOase_C
LOC_Os11g06820	3338876	3340595	AT1G77690	29200941	29203340	ortholog_one2one	3	1	IPR013057	AA_transpt_TM
LOC_Os11g04840	2055250	2059246	AT1G77740	29220538	29224220	between_species_paralog	5	4	IPR016034	PInositol-4P-5-kinase_core_sub
LOC_Os11g15520	8784529	8792759	AT2G04160	1401268	1407745	between_species_paralog	4	2	IPR000209	Peptidase_S8/S53
LOC_Os11g40030	23399915	23401778	AT2G23430	9976746	9978021	ortholog_one2many	5	2	IPR016701	CDK_inhib_pln
LOC_Os11g06820	3338876	3340595	AT2G38120	15972993	15977180	between_species_paralog	3	1	IPR013057	AA_transpt_TM
LOC_Os11g03310	1239059	1244395	AT3G15170	5109883	5111447	between_species_paralog	2	1	IPR003441	NAM
LOC_Os11g03370	1268315	1270304	AT3G15170	5109883	5111447	between_species_paralog	2	1	IPR003441	NAM
LOC_Os11g43900	26039285	26041549	AT3G16640	5669373	5670842	ortholog_one2many	5	2	IPR018105	Translational_control_tumour_p
LOC_Os11g36719	21208904	21218651	AT3G22400	7926879	7931351	ortholog_many2many	5	4	IPR013819	LipOase_C
LOC_Os11g11490	6377420	6381591	AT3G59420	21959647	21963041	between_species_paralog	11	5	IPR002290	Ser_thr_pkinase
LOC_Os11g44250	26270305	26272294	AT3G59420	21959647	21963041	between_species_paralog	10	4	IPR002290	Ser_thr_pkinase
LOC_Os11g44260	26279289	26280752	AT3G59420	21959647	21963041	between_species_paralog	11	3	IPR002290	Ser_thr_pkinase
LOC_Os11g44390	26372900	26380144	AT3G59420	21959647	21963041	between_species_paralog	10	3	IPR002290	Ser_thr_pkinase
LOC_Os11g44415	26401759	26402300	AT3G59420	21959647	21963041	between_species_paralog	9	1	IPR011009	Kinase-like
LOC_Os11g44420	26403754	26404504	AT3G59420	21959647	21963041	between_species_paralog	9	0
LOC_Os11g44430	26406261	26408434	AT3G59420	21959647	21963041	between_species_paralog	11	4	IPR002290	Ser_thr_pkinase
LOC_Os11g44460	26431717	26432061	AT3G59420	21959647	21963041	between_species_paralog	9	0
LOC_Os11g44500	26444881	26446774	AT3G59420	21959647	21963041	between_species_paralog	10	4	IPR002290	Ser_thr_pkinase
LOC_Os11g44520	26452103	26453539	AT3G59420	21959647	21963041	between_species_paralog	10	1	IPR011009	Kinase-like
LOC_Os11g44550	26462556	26463824	AT3G59420	21959647	21963041	between_species_paralog	10	3	IPR002290	Ser_thr_pkinase
LOC_Os11g44560	26468406	26475274	AT3G59420	21959647	21963041	between_species_paralog	10	4	IPR002290	Ser_thr_pkinase
LOC_Os11g27450	15336244	15340245	AT3G62980	23273116	23276375	between_species_paralog	5	1	IPR006553	Leu-rich_rpt_Cys-con_subtyp
LOC_Os11g31620	18019166	18024771	AT3G62980	23273116	23276375	between_species_paralog	4	2	IPR001810	F-box
LOC_Os11g11410	6331645	6338061	AT4G14550	8347822	8350019	between_species_paralog	4	1	IPR003311	AUX_IAA
LOC_Os11g34160	19535929	19539372	AT4G33495	16110712	16112597	between_species_paralog	2	1	IPR001578	Peptidase_C12
LOC_Os11g39990	23378486	23382437	AT4G37070	17464785	17467109	between_species_paralog	4	2	IPR016035	Acyl_Trfase/lysoPlipase
LOC_Os11g40009	23385892	23394750	AT4G37070	17464785	17467109	between_species_paralog	3	2	IPR016035	Acyl_Trfase/lysoPlipase
LOC_Os11g05880	2755659	2760888	AT5G03540	889566	894167	ortholog_many2many	2	1	IPR004140	Exo70
LOC_Os11g29870	16885937	16889672	AT5G13080	4149740	4151150	ortholog_one2many	2	1	IPR003657	WRKY_DNA_bd
LOC_Os11g11410	6331645	6338061	AT5G25890	9033415	9034834	between_species_paralog	4	1	IPR003311	AUX_IAA
LOC_Os11g27450	15336244	15340245	AT1G12820	4368760	4371293	between_species_paralog	6	1	IPR006553	Leu-rich_rpt_Cys-con_subtyp
LOC_Os11g31620	18019166	18024771	AT1G12820	4368760	4371293	ortholog_many2many	5	2	IPR001810	F-box
LOC_Os11g41880	24715139	24717316	AT3G07780	2484469	2487024	ortholog_many2many	5	2	IPR001965	Znf_PHD
LOC_Os11g41880	24715139	24717316	AT5G48160	19527833	19530316	ortholog_many2many	5	2	IPR001965	Znf_PHD
LOC_Os11g05614	2546455	2549032	AT1G26870	9312856	9314983	between_species_paralog	2	1	IPR003441	NAM
LOC_Os11g45950	27332563	27333353	AT1G26870	9312856	9314983	between_species_paralog	2	1	IPR003441	NAM
LOC_Os11g06820	3338876	3340595	AT1G77690	29200941	29203340	ortholog_one2one	3	1	IPR013057	AA_transpt_TM
LOC_Os11g06820	3338876	3340595	AT2G21050	9034090	9036636	between_species_paralog	3	1	IPR013057	AA_transpt_TM
LOC_Os11g06820	3338876	3340595	AT2G38120	15972993	15977180	between_species_paralog	3	1	IPR013057	AA_transpt_TM
LOC_Os11g11490	6377420	6381591	AT3G59420	21959647	21963041	between_species_paralog	11	5	IPR002290	Ser_thr_pkinase
LOC_Os11g44250	26270305	26272294	AT3G59420	21959647	21963041	between_species_paralog	10	4	IPR002290	Ser_thr_pkinase
LOC_Os11g44260	26279289	26280752	AT3G59420	21959647	21963041	between_species_paralog	11	3	IPR002290	Ser_thr_pkinase
LOC_Os11g44390	26372900	26380144	AT3G59420	21959647	21963041	between_species_paralog	10	3	IPR002290	Ser_thr_pkinase
LOC_Os11g44415	26401759	26402300	AT3G59420	21959647	21963041	between_species_paralog	9	1	IPR011009	Kinase-like
LOC_Os11g44420	26403754	26404504	AT3G59420	21959647	21963041	between_species_paralog	9	0
LOC_Os11g44430	26406261	26408434	AT3G59420	21959647	21963041	between_species_paralog	11	4	IPR002290	Ser_thr_pkinase
LOC_Os11g44460	26431717	26432061	AT3G59420	21959647	21963041	between_species_paralog	9	0
[truncated: 207 more rows]
